# Supplementary material for: iPoLNG—An unsupervised model for the integrative analysis of single-cell multiomics data
Source: Front Genet. 2023 Feb 7;14:998504. doi: 10.3389/fgene.2023.998504 (PMC9972291; doi:10.3389/fgene.2023.998504)
Supplement: Supplementary file 2 [file Table2.XLS]

## Sheet: SupplementaryFile2
# GREAT version 4.0.4	Species assembly: hg38	Association rule: Basal+extension: 5000 bp upstream, 1000 bp downstream, 1000000 bp max extension, curated regulatory domains included
# Term Name	Binom Rank	Binom Raw P-Value	Binom FDR Q-Val	Binom Fold Enrichment	Binom Observed Region Hits	Binom Region Set Coverage	Hyper Rank	Hyper FDR Q-Val	Hyper Fold Enrichment	Hyper Observed Gene Hits	Hyper Total Genes	Hyper Gene Set Coverage
regulation of immune response	4	8.86898e-16	2.91767e-12	2.05811	140	0.14	23	0.000302227	1.60661	108	914	0.0782042
positive regulation of immune response	6	6.18112e-13	1.35562e-09	2.1954	99	0.099	41	0.00302028	1.67379	73	593	0.0528602
positive regulation of lymphocyte activation	7	8.85904e-12	1.66537e-08	2.51151	69	0.069	13	7.7907e-05	2.33531	45	262	0.0325851
regulation of lymphocyte activation	8	1.90303e-11	3.13024e-08	2.16753	89	0.089	7	5.23833e-06	2.17547	64	400	0.0463432
positive regulation of cell activation	9	3.45835e-11	5.05649e-08	2.36126	73	0.073	18	0.00011598	2.19157	49	304	0.0354815
B cell receptor signaling pathway	10	3.7268e-11	4.9041e-08	5.83925	23	0.023	92	0.0214368	3.88476	10	35	0.00724113
regulation of leukocyte activation	11	5.16003e-11	6.17281e-08	2.05422	96	0.096	6	5.94399e-06	2.08053	71	464	0.051412
immune response-regulating cell surface receptor signaling pathway	12	5.60646e-11	6.14795e-08	2.48463	65	0.065	115	0.0296151	1.76972	41	315	0.0296886
positive regulation of gliogenesis	14	6.43943e-11	6.05261e-08	4.61235	28	0.028	102	0.0271218	3.2632	12	50	0.00868936
positive regulation of leukocyte activation	17	5.06057e-10	3.91717e-07	2.28092	69	0.069	30	0.000947621	2.08112	45	294	0.0325851
regulation of antigen receptor-mediated signaling pathway	19	6.37663e-10	4.41632e-07	4.81508	24	0.024	80	0.014963	3.33503	13	53	0.00941347
immune response-regulating signaling pathway	20	6.90086e-10	4.54042e-07	2.16134	76	0.076	100	0.0260711	1.67495	51	414	0.0369298
regulation of leukocyte cell-cell adhesion	21	9.68233e-10	6.06713e-07	2.18489	73	0.073	19	0.000120082	2.14684	51	323	0.0369298
hemostasis	25	1.79688e-09	9.45806e-07	2.34921	61	0.061	69	0.00880351	1.87993	43	311	0.0311369
regulation of T cell activation	26	1.8787e-09	9.50838e-07	2.22314	68	0.068	26	0.000714012	2.07482	47	308	0.0340333
regulation of B cell activation	27	2.88298e-09	1.40508e-06	3.06673	38	0.038	17	0.0001063	3.12844	26	113	0.0188269
positive regulation of leukocyte cell-cell adhesion	29	3.94253e-09	1.78896e-06	2.44926	54	0.054	46	0.00313228	2.20137	34	210	0.0246198
positive regulation of T cell activation	30	5.23885e-09	2.29793e-06	2.50504	51	0.051	53	0.00688548	2.16464	32	201	0.0231716
blood coagulation	33	8.07106e-09	3.2184e-06	2.29076	59	0.059	90	0.0202402	1.82178	41	306	0.0296886
coagulation	35	8.36461e-09	3.14485e-06	2.28841	59	0.059	96	0.0218801	1.80995	41	308	0.0296886
positive regulation of cytokine production	48	8.18522e-08	2.24394e-05	2.02453	67	0.067	27	0.000825304	1.93735	55	386	0.0398262
regulation of B cell proliferation	55	4.02575e-07	9.63178e-05	3.50698	23	0.023	47	0.0047108	3.45678	15	59	0.0108617
positive regulation of cell-cell adhesion	62	7.44392e-07	0.000157991	2.04164	56	0.056	59	0.00755812	2.0395	36	240	0.0260681
positive regulation of B cell activation	66	1.09142e-06	0.000217606	3.11257	25	0.025	35	0.00225476	3.2632	18	75	0.013034
positive regulation of peptidase activity	71	2.04858e-06	0.00037968	2.45347	35	0.035	132	0.0395654	2.07266	25	164	0.0181028
pons maturation	73	2.16498e-06	0.00039026	25.1709	5	0.005	133	0.0392825	13.5967	3	3	0.00217234
regulation of lymphocyte proliferation	80	3.30939e-06	0.000544353	2.12601	45	0.045	73	0.0111708	2.10748	31	200	0.0224475
regulation of mononuclear cell proliferation	81	3.60261e-06	0.000585268	2.11883	45	0.045	75	0.0119684	2.097	31	201	0.0224475
B cell activation	84	4.69136e-06	0.000734924	2.39571	34	0.034	54	0.00715667	2.42798	25	140	0.0181028
regulation of leukocyte proliferation	97	1.09304e-05	0.00148281	2.02542	45	0.045	91	0.0206037	2.01673	31	209	0.0224475
