# Supplementary material for: iPoLNG—An unsupervised model for the integrative analysis of single-cell multiomics data
Source: Front Genet. 2023 Feb 7;14:998504. doi: 10.3389/fgene.2023.998504 (PMC9972291; doi:10.3389/fgene.2023.998504)
Supplement: Supplementary file 4 [file Table1.XLSX]

## Sheet: Annotation
Factor28	Gene ID	Type	Tax ID	Homologene Gene ID	Homologene Gene Tax ID	Gene Symbol	Description	Biological Process (GO)	Kinase Class (UniProt)	Protein Function (Protein Atlas)	Subcellular Location (Protein Atlas)	Drug (DrugBank)	Canonical Pathways	Hallmark Gene Sets	GO:0002429 immune response-activating cel	GO:0051249 regulation of lymphocyte activ	WP5218 Extrafollicular B cell activat	GO:0050864 regulation of B cell activatio	R-HSA-983695 Antigen activates B Cell Recep	R-HSA-1280215 Cytokine Signaling in Immune s	R-HSA-156902 Peptide chain elongation	WP3995 Prion disease pathway	R-HSA-2029480 Fcgamma receptor (FCGR) depend	GO:0002431 Fc receptor mediated stimulato	GO:0002699 positive regulation of immune	hsa04666 Fc gamma R-mediated phagocytos	GO:0006468 protein phosphorylation	WP3888 VEGFA-VEGFR2 signaling pathway	GO:0002683 negative regulation of immune	GO:0045577 regulation of B cell different	GO:0030029 actin filament-based process	hsa04064 NF-kappa B signaling pathway	GO:0042100 B cell proliferation	GO:0007169 transmembrane receptor protein
IGLC2	3538	symbol	H. sapiens	3538	H. sapiens	IGLC2	immunoglobulin lambda constant 2	GO:0006910 phagocytosis, recognition;GO:0006958 complement activation, classical pathway;GO:0002455 humoral immune response mediated by circulating immunoglobulin		Predicted intracellular proteins; Predicted secreted proteins					1.0	1.0	0.0	1.0	0.0	0.0	0.0	0.0	0.0	0.0	0.0	0.0	0.0	0.0	0.0	0.0	0.0	0.0	0.0	0.0
TCF4	6925	symbol	H. sapiens	6925	H. sapiens	TCF4	transcription factor 4	GO:0045666 positive regulation of neuron differentiation;GO:0045664 regulation of neuron differentiation;GO:0065004 protein-DNA complex assembly		Human disease related genes:Congenital malformations:Other congenital malformations; Transcription factors:Basic domains; Human disease related genes:Nervous system diseases:Eye disease; Disease related genes; Predicted intracellular proteins	Cytosol;Nucleoplasm (Supported)		(M58)PID AR PATHWAY; (M223)PID BETA CATENIN NUC PATHWAY		0.0	0.0	0.0	0.0	0.0	0.0	0.0	0.0	0.0	0.0	0.0	0.0	0.0	0.0	0.0	0.0	0.0	0.0	0.0	0.0
IGHM	3507	symbol	H. sapiens	3507	H. sapiens	IGHM	immunoglobulin heavy constant mu	GO:0019731 antibacterial humoral response;GO:0050829 defense response to Gram-negative bacterium;GO:0006910 phagocytosis, recognition		Disease related genes; Predicted intracellular proteins; Predicted secreted proteins					1.0	1.0	0.0	1.0	0.0	0.0	0.0	0.0	0.0	0.0	0.0	0.0	0.0	0.0	0.0	0.0	0.0	0.0	0.0	0.0
IGLC1	3537	symbol	H. sapiens	3537	H. sapiens	IGLC1	immunoglobulin lambda constant 1	GO:0006910 phagocytosis, recognition;GO:0006958 complement activation, classical pathway;GO:0002455 humoral immune response mediated by circulating immunoglobulin		Predicted intracellular proteins; Predicted secreted proteins					1.0	1.0	0.0	1.0	0.0	0.0	0.0	0.0	0.0	0.0	0.0	0.0	0.0	0.0	0.0	0.0	0.0	0.0	0.0	0.0
SOX5	6660	symbol	H. sapiens	6660	H. sapiens	SOX5	SRY-box transcription factor 5	GO:2000741 positive regulation of mesenchymal stem cell differentiation;GO:0055059 asymmetric neuroblast division;GO:2000739 regulation of mesenchymal stem cell differentiation		Disease related genes; Transcription factors:Other all-alpha-helical DNA-binding domains; Predicted intracellular proteins; Human disease related genes:Other congenital disorders:Chromosomal abnormalities	Nucleoplasm (Supported)				0.0	0.0	0.0	0.0	0.0	0.0	0.0	0.0	0.0	0.0	0.0	0.0	0.0	0.0	0.0	0.0	0.0	0.0	0.0	0.0
BANK1	55024	symbol	H. sapiens	55024	H. sapiens	BANK1	B cell scaffold protein with ankyrin repeats 1	GO:0045947 negative regulation of translational initiation;GO:0050869 negative regulation of B cell activation;GO:0051898 negative regulation of protein kinase B signaling		Disease related genes; Predicted intracellular proteins; Human disease related genes:Skin diseases:Skin and soft tissue diseases; Human disease related genes:Immune system diseases:Allergies and autoimmune diseases	Cytosol;Plasma membrane (Approved); Additional: Nucleoplasm			(M5913)HALLMARK INTERFERON GAMMA RESPONSE	1.0	1.0	0.0	1.0	1.0	0.0	0.0	0.0	0.0	1.0	0.0	0.0	0.0	0.0	1.0	0.0	0.0	1.0	0.0	0.0
HLA-DPB1	3115	symbol	H. sapiens	3115	H. sapiens	HLA-DPB1	major histocompatibility complex, class II, DP beta 1	GO:0002399 MHC class II protein complex assembly;GO:0002503 peptide antigen assembly with MHC class II protein complex;GO:0002396 MHC protein complex assembly		Human disease related genes:Skin diseases:Skin and soft tissue diseases; Human disease related genes:Immune system diseases:Allergies and autoimmune diseases; Human disease related genes:Cardiovascular diseases:Cardiac diseases	Cell Junctions (Approved); Additional: Nucleoplasm				1.0	1.0	0.0	1.0	1.0	1.0	0.0	0.0	0.0	0.0	0.0	0.0	0.0	0.0	0.0	0.0	0.0	0.0	0.0	0.0
GPM6A	2823	symbol	H. sapiens	2823	H. sapiens	GPM6A	glycoprotein M6A	GO:0051491 positive regulation of filopodium assembly;GO:0051489 regulation of filopodium assembly;GO:0003407 neural retina development		Predicted intracellular proteins					1.0	0.0	0.0	0.0	0.0	0.0	0.0	0.0	0.0	0.0	0.0	0.0	0.0	0.0	0.0	0.0	1.0	0.0	0.0	0.0
MS4A1	931	symbol	H. sapiens	931	H. sapiens	MS4A1	membrane spanning 4-domains A1	GO:1902656 calcium ion import into cytosol;GO:0002115 store-operated calcium entry;GO:0042100 B cell proliferation		Transporters:Transporter channels and pores; CD markers; Disease related genes; Human disease related genes:Immune system diseases:Primary immunodeficiency; Predicted intracellular proteins; FDA approved drug targets:Small molecule drugs; FDA approved drug targets:Biotech drugs	Plasma membrane (Supported)	Rituximab; Ibritumomab tiuxetan; Tositumomab; Ofatumumab; Obinutuzumab; Technetium Tc-99m nofetumomab merpentan; Ocrelizumab			1.0	1.0	1.0	0.0	1.0	0.0	0.0	0.0	0.0	0.0	0.0	0.0	0.0	0.0	0.0	0.0	0.0	0.0	1.0	0.0
CD79A	973	symbol	H. sapiens	973	H. sapiens	CD79A	CD79a molecule	GO:0042100 B cell proliferation;GO:0046651 lymphocyte proliferation;GO:0032943 mononuclear cell proliferation		Cancer-related genes; CD markers; Disease related genes; Human disease related genes:Cancers:Cancers of haematopoietic and lymphoid tissues; Human disease related genes:Immune system diseases:Primary immunodeficiency; Predicted intracellular proteins			(M10)PID BCR 5PATHWAY	(M5950)HALLMARK ALLOGRAFT REJECTION	1.0	1.0	1.0	0.0	1.0	0.0	0.0	0.0	0.0	0.0	0.0	0.0	0.0	0.0	0.0	0.0	0.0	0.0	1.0	0.0
HLA-DPA1	3113	symbol	H. sapiens	3113	H. sapiens	HLA-DPA1	major histocompatibility complex, class II, DP alpha 1	GO:0002399 MHC class II protein complex assembly;GO:0002503 peptide antigen assembly with MHC class II protein complex;GO:0002396 MHC protein complex assembly		Predicted intracellular proteins; Human disease related genes:Skin diseases:Skin and soft tissue diseases; Human disease related genes:Immune system diseases:Allergies and autoimmune diseases; Human disease related genes:Cardiovascular diseases:Cardiac diseases	Vesicles (Supported)				0.0	1.0	0.0	1.0	1.0	1.0	0.0	0.0	0.0	0.0	0.0	0.0	0.0	0.0	0.0	0.0	0.0	0.0	0.0	0.0
CD74	972	symbol	H. sapiens	972	H. sapiens	CD74	CD74 molecule	GO:0035691 macrophage migration inhibitory factor signaling pathway;GO:2000448 positive regulation of macrophage migration inhibitory factor signaling pathway;GO:2000446 regulation of macrophage migration inhibitory factor signaling pathway		Transporters; CD markers; Disease related genes; Potential drug targets; Cancer-related genes:Candidate cancer biomarkers	Golgi apparatus (Supported)			(M5911)HALLMARK INTERFERON ALPHA RESPONSE; (M5913)HALLMARK INTERFERON GAMMA RESPONSE; (M5950)HALLMARK ALLOGRAFT REJECTION	1.0	1.0	0.0	1.0	1.0	0.0	0.0	0.0	0.0	1.0	1.0	0.0	0.0	0.0	1.0	0.0	0.0	1.0	0.0	0.0
HLA-DQA1	3117	symbol	H. sapiens	3117	H. sapiens	HLA-DQA1	major histocompatibility complex, class II, DQ alpha 1	GO:0002399 MHC class II protein complex assembly;GO:0002503 peptide antigen assembly with MHC class II protein complex;GO:0002396 MHC protein complex assembly		Predicted intracellular proteins; Transporters; Human disease related genes:Immune system diseases:Allergies and autoimmune diseases; Human disease related genes:Endocrine and metabolic diseases:Diabetes; Human disease related genes:Cardiovascular diseases:Cardiac diseases; Human disease related genes:Digestive system diseases:Gastrointestinal diseases; Human disease related genes:Skin diseases:S…				(M5913)HALLMARK INTERFERON GAMMA RESPONSE; (M5950)HALLMARK ALLOGRAFT REJECTION	0.0	1.0	0.0	0.0	1.0	1.0	0.0	0.0	0.0	0.0	0.0	0.0	0.0	0.0	0.0	0.0	0.0	0.0	0.0	0.0
IFNG-AS1	100885789	symbol	H. sapiens	100885789	H. sapiens	IFNG-AS1	IFNG antisense RNA 1								0.0	0.0	1.0	0.0	0.0	0.0	0.0	0.0	0.0	0.0	0.0	0.0	0.0	0.0	0.0	0.0	0.0	0.0	0.0	0.0
HLA-DRA	3122	symbol	H. sapiens	3122	H. sapiens	HLA-DRA	major histocompatibility complex, class II, DR alpha	GO:0002491 antigen processing and presentation of endogenous peptide antigen via MHC class II;GO:0002469 myeloid dendritic cell antigen processing and presentation;GO:0002468 dendritic cell antigen processing and presentation				1D09C3; Coccidioides immitis spherule	(M290)PID IL12 STAT4 PATHWAY; (M54)PID IL12 2PATHWAY; (M34)PID TCR PATHWAY	(M5950)HALLMARK ALLOGRAFT REJECTION	1.0	1.0	0.0	0.0	1.0	1.0	0.0	0.0	0.0	1.0	1.0	0.0	0.0	0.0	0.0	1.0	0.0	0.0	0.0	0.0
RALGPS2	55103	symbol	H. sapiens	55103	H. sapiens	RALGPS2	Ral GEF with PH domain and SH3 binding motif 2	GO:0032485 regulation of Ral protein signal transduction;GO:0046578 regulation of Ras protein signal transduction;GO:0007265 Ras protein signal transduction		Disease related genes; Predicted intracellular proteins	Cytosol;Nucleoplasm (Uncertain)				0.0	0.0	0.0	0.0	0.0	0.0	0.0	0.0	0.0	0.0	0.0	0.0	0.0	0.0	0.0	0.0	0.0	0.0	0.0	0.0
EBF1	1879	symbol	H. sapiens	1879	H. sapiens	EBF1	EBF transcription factor 1	GO:0006357 regulation of transcription by RNA polymerase II;GO:0006355 regulation of transcription, DNA-templated;GO:1903506 regulation of nucleic acid-templated transcription		Transcription factors:Immunoglobulin fold; Cancer-related genes; Predicted intracellular proteins	Nucleoplasm (Approved); Additional: Vesicles				0.0	0.0	0.0	0.0	0.0	0.0	0.0	1.0	0.0	0.0	0.0	0.0	0.0	0.0	0.0	0.0	0.0	0.0	0.0	0.0
CCSER1	401145	symbol	H. sapiens	401145	H. sapiens	CCSER1	coiled-coil serine rich protein 1			Predicted intracellular proteins					0.0	0.0	0.0	0.0	0.0	0.0	0.0	0.0	0.0	0.0	0.0	0.0	0.0	0.0	0.0	0.0	0.0	0.0	0.0	0.0
AL589693.1						None	None	None	None	None	None	None	None	None	nan	nan	nan	nan	nan	nan	nan	nan	nan	nan	nan	nan	nan	nan	nan	nan	nan	nan	nan	nan
OSBPL10	114884	symbol	H. sapiens	114884	H. sapiens	OSBPL10	oxysterol binding protein like 10	GO:0036150 phosphatidylserine acyl-chain remodeling;GO:0006658 phosphatidylserine metabolic process;GO:0015918 sterol transport		Predicted intracellular proteins	Cytosol;Golgi apparatus;Plasma membrane (Approved)				0.0	0.0	0.0	0.0	0.0	0.0	0.0	0.0	0.0	0.0	0.0	0.0	0.0	0.0	0.0	0.0	0.0	0.0	0.0	0.0
AFF3	3899	symbol	H. sapiens	3899	H. sapiens	AFF3	AF4/FMR2 family member 3	GO:0035116 embryonic hindlimb morphogenesis;GO:0035137 hindlimb morphogenesis;GO:0030326 embryonic limb morphogenesis		Cancer-related genes; Predicted intracellular proteins	Nucleoplasm (Supported); Additional: Cytosol				0.0	0.0	0.0	0.0	0.0	0.0	0.0	0.0	0.0	0.0	0.0	0.0	0.0	0.0	0.0	0.0	0.0	0.0	0.0	0.0
LIX1-AS1	101926893	symbol	H. sapiens	101926893	H. sapiens	LIX1-AS1	LIX1 and RIOK2 antisense RNA 1								0.0	0.0	0.0	0.0	0.0	0.0	0.0	0.0	0.0	0.0	0.0	0.0	0.0	0.0	0.0	0.0	0.0	0.0	0.0	0.0
HLA-DRB1	3123	symbol	H. sapiens	3123	H. sapiens	HLA-DRB1	major histocompatibility complex, class II, DR beta 1	GO:0002491 antigen processing and presentation of endogenous peptide antigen via MHC class II;GO:0002469 myeloid dendritic cell antigen processing and presentation;GO:0002468 dendritic cell antigen processing and presentation		Human disease related genes:Nervous system diseases:Other nervous and sensory system diseases; Human disease related genes:Immune system diseases:Allergies and autoimmune diseases; Human disease related genes:Immune system diseases:Other immune system diseases; Human disease related genes:Endocrine and metabolic diseases:Diabetes; Human disease related genes:Cardiovascular diseases:Cardiac diseas…				(M5913)HALLMARK INTERFERON GAMMA RESPONSE	1.0	1.0	0.0	1.0	1.0	1.0	0.0	0.0	0.0	0.0	1.0	0.0	1.0	0.0	1.0	1.0	0.0	0.0	0.0	0.0
TCL1A	8115	symbol	H. sapiens	8115	H. sapiens	TCL1A	TCL1 family AKT coactivator A	GO:0010918 positive regulation of mitochondrial membrane potential;GO:0045838 positive regulation of membrane potential;GO:0051881 regulation of mitochondrial membrane potential		Disease related genes; Cancer-related genes; Predicted intracellular proteins	Cytosol;Endoplasmic reticulum (Enhanced); Additional: Nucleoplasm			(M5956)HALLMARK KRAS SIGNALING DN	0.0	0.0	0.0	0.0	0.0	0.0	0.0	0.0	0.0	0.0	0.0	0.0	0.0	0.0	0.0	0.0	1.0	0.0	0.0	0.0
PDE4D	5144	symbol	H. sapiens	5144	H. sapiens	PDE4D	phosphodiesterase 4D	GO:0086024 adenylate cyclase-activating adrenergic receptor signaling pathway involved in positive regulation of heart rate;GO:1901898 negative regulation of relaxation of cardiac muscle;GO:0140200 adenylate cyclase-activating adrenergic receptor signaling pathway involved in regulation of heart rate		Predicted intracellular proteins; Human disease related genes:Congenital malformations:Congenital malformations of the musculoskeletal system; ENZYME proteins:Hydrolases; Disease related genes; Enzymes; FDA approved drug targets:Small molecule drugs	Plasma membrane (Supported); Additional: Cytosol	Adenosine phosphate; Dyphylline; Iloprost; Roflumilast; Piclamilast; Rolipram; 3,5-Dimethyl-1-(3-Nitrophenyl)-1h-Pyrazole-4-Carboxylic Acid Ethyl Ester; 2-[3-(2-Hydroxy-1,1-Dihydroxymethyl-Ethylamino)-Propylamino]-2-Hydroxymethyl-Propane-1,3-Diol; Zardaverine; 1-(4-Aminophenyl)-3,5-Dimethyl-1h-Pyrazole-4-Carboxylic Acid Ethyl Ester; (S)-Rolipram; Cilomilast; (R)-Rolipram; 3,5-Dimethyl-1h-Pyrazole…			1.0	0.0	0.0	1.0	0.0	0.0	0.0	0.0	0.0	0.0	0.0	0.0	0.0	0.0	0.0	0.0	1.0	1.0	0.0	0.0
PAX5	5079	symbol	H. sapiens	5079	H. sapiens	PAX5	paired box 5	GO:0021670 lateral ventricle development;GO:0051573 negative regulation of histone H3-K9 methylation;GO:0031061 negative regulation of histone methylation		Disease related genes; Human disease related genes:Cancers:Cancers of haematopoietic and lymphoid tissues; Transcription factors:Helix-turn-helix domains; Predicted intracellular proteins; Cancer-related genes:Candidate cancer biomarkers	Nucleoplasm (Supported); Additional: Cytosol;Nucleoli fibrillar center;Vesicles		(M195)PID CMYB PATHWAY		1.0	0.0	1.0	0.0	0.0	0.0	0.0	1.0	0.0	0.0	0.0	0.0	0.0	0.0	0.0	0.0	0.0	1.0	0.0	0.0
BCL11A	53335	symbol	H. sapiens	53335	H. sapiens	BCL11A	BAF chromatin remodeling complex subunit BCL11A	GO:1904799 regulation of neuron remodeling;GO:1904800 negative regulation of neuron remodeling;GO:2000173 negative regulation of branching morphogenesis of a nerve		Disease related genes; Transcription factors:Zinc-coordinating DNA-binding domains; Predicted intracellular proteins; Cancer-related genes:Candidate cancer biomarkers; Human disease related genes:Other diseases:Mental and behavioural disorders	Nucleoplasm (Supported); Additional: Nuclear bodies				0.0	0.0	0.0	0.0	0.0	0.0	0.0	1.0	0.0	0.0	0.0	0.0	0.0	0.0	0.0	0.0	0.0	0.0	0.0	0.0
IRF8	3394	symbol	H. sapiens	3394	H. sapiens	IRF8	interferon regulatory factor 8	GO:0002273 plasmacytoid dendritic cell differentiation;GO:0002270 plasmacytoid dendritic cell activation;GO:0002316 follicular B cell differentiation		Disease related genes; Transcription factors:Helix-turn-helix domains; Human disease related genes:Immune system diseases:Primary immunodeficiency; Predicted intracellular proteins	Nucleoplasm (Enhanced)		(M22)PID GMCSF PATHWAY; (M254)PID MYC REPRESS PATHWAY	(M5947)HALLMARK IL2 STAT5 SIGNALING; (M5913)HALLMARK INTERFERON GAMMA RESPONSE; (M5934)HALLMARK XENOBIOTIC METABOLISM	1.0	1.0	1.0	1.0	1.0	1.0	0.0	0.0	0.0	1.0	0.0	0.0	0.0	0.0	0.0	0.0	0.0	0.0	0.0	0.0
IGKC	3514	symbol	H. sapiens	3514	H. sapiens	IGKC	immunoglobulin kappa constant	GO:0001895 retina homeostasis;GO:0006910 phagocytosis, recognition;GO:0006958 complement activation, classical pathway		Predicted intracellular proteins; Predicted secreted proteins					1.0	1.0	0.0	1.0	0.0	0.0	0.0	0.0	0.0	0.0	0.0	0.0	0.0	0.0	0.0	0.0	0.0	0.0	0.0	0.0
MTSS1	9788	symbol	H. sapiens	9788	H. sapiens	MTSS1	MTSS I-BAR domain containing 1	GO:0072160 nephron tubule epithelial cell differentiation;GO:0030035 microspike assembly;GO:2001013 epithelial cell proliferation involved in renal tubule morphogenesis		Predicted intracellular proteins	Cytosol;Plasma membrane (Approved)		(M219)PID HEDGEHOG GLI PATHWAY		0.0	0.0	0.0	0.0	0.0	0.0	0.0	0.0	0.0	0.0	0.0	0.0	0.0	0.0	0.0	0.0	1.0	0.0	1.0	1.0
IGHD	3495	symbol	H. sapiens	3495	H. sapiens	IGHD	immunoglobulin heavy constant delta	GO:0032732 positive regulation of interleukin-1 production;GO:0006910 phagocytosis, recognition;GO:0006958 complement activation, classical pathway		Predicted intracellular proteins; Predicted secreted proteins					1.0	1.0	0.0	1.0	0.0	0.0	0.0	0.0	0.0	0.0	0.0	0.0	0.0	0.0	0.0	0.0	0.0	0.0	0.0	0.0
COL19A1	1310	symbol	H. sapiens	1310	H. sapiens	COL19A1	collagen type XIX alpha 1 chain	GO:0007519 skeletal muscle tissue development;GO:0060538 skeletal muscle organ development;GO:0030198 extracellular matrix organization		Predicted intracellular proteins; Predicted secreted proteins			(M3005)NABA COLLAGENS; (M5884)NABA CORE MATRISOME; (M5889)NABA MATRISOME		0.0	0.0	0.0	0.0	0.0	0.0	0.0	0.0	0.0	0.0	0.0	0.0	0.0	0.0	0.0	0.0	0.0	0.0	0.0	0.0
FCRL1	115350	symbol	H. sapiens	115350	H. sapiens	FCRL1	Fc receptor like 1	GO:0042113 B cell activation;GO:0046649 lymphocyte activation;GO:0045321 leukocyte activation		Predicted intracellular proteins; CD markers					0.0	0.0	0.0	0.0	1.0	0.0	0.0	0.0	0.0	0.0	0.0	0.0	0.0	0.0	0.0	0.0	0.0	0.0	0.0	0.0
COBLL1	22837	symbol	H. sapiens	22837	H. sapiens	COBLL1	cordon-bleu WH2 repeat protein like 1			Predicted intracellular proteins	Cell Junctions (Approved)				0.0	0.0	0.0	0.0	0.0	0.0	0.0	0.0	0.0	0.0	0.0	0.0	0.0	0.0	0.0	0.0	0.0	0.0	0.0	0.0
BLK	640	symbol	H. sapiens	640	H. sapiens	BLK	BLK proto-oncogene, Src family tyrosine kinase	GO:0070667 negative regulation of mast cell proliferation;GO:0070666 regulation of mast cell proliferation;GO:2000670 positive regulation of dendritic cell apoptotic process	Tyr protein kinase family	Predicted intracellular proteins; ENZYME proteins:Transferases; Human disease related genes:Endocrine and metabolic diseases:Diabetes; Disease related genes; Kinases:Tyr protein kinases; Potential drug targets; Enzymes; Cancer-related genes:Candidate cancer biomarkers	Nucleoplasm (Uncertain)	Fostamatinib; Zanubrutinib	(M33)PID GLYPICAN 1PATHWAY; (M76)PID P38 ALPHA BETA PATHWAY; (M257)PID EPHRINB REV PATHWAY		1.0	1.0	0.0	1.0	1.0	0.0	0.0	0.0	1.0	1.0	1.0	0.0	1.0	0.0	1.0	0.0	0.0	0.0	0.0	1.0
NIBAN3	199786	symbol	H. sapiens	199786	H. sapiens	NIBAN3	niban apoptosis regulator 3			Predicted intracellular proteins	Cytosol;Nucleoplasm (Approved)				0.0	0.0	0.0	0.0	0.0	0.0	0.0	0.0	0.0	0.0	0.0	0.0	0.0	0.0	0.0	0.0	0.0	0.0	0.0	0.0
HLA-DRB5	3127	symbol	H. sapiens	3127	H. sapiens	HLA-DRB5	major histocompatibility complex, class II, DR beta 5	GO:0002399 MHC class II protein complex assembly;GO:0002503 peptide antigen assembly with MHC class II protein complex;GO:0002396 MHC protein complex assembly		Human disease related genes:Cancers:Cancers of haematopoietic and lymphoid tissues					0.0	1.0	0.0	0.0	1.0	1.0	0.0	0.0	0.0	0.0	1.0	0.0	0.0	0.0	0.0	1.0	0.0	0.0	0.0	0.0
HLA-DQB1	3119	symbol	H. sapiens	3119	H. sapiens	HLA-DQB1	major histocompatibility complex, class II, DQ beta 1	GO:0002399 MHC class II protein complex assembly;GO:0002503 peptide antigen assembly with MHC class II protein complex;GO:0002396 MHC protein complex assembly		Human disease related genes:Nervous system diseases:Other nervous and sensory system diseases; Predicted intracellular proteins; Human disease related genes:Immune system diseases:Allergies and autoimmune diseases; Human disease related genes:Endocrine and metabolic diseases:Diabetes; Human disease related genes:Cardiovascular diseases:Cardiac diseases; Human disease related genes:Digestive syste…	Rods & Rings (Supported); Additional: Golgi apparatus	Insulin pork			1.0	1.0	0.0	0.0	1.0	1.0	0.0	0.0	0.0	0.0	0.0	0.0	0.0	0.0	0.0	0.0	0.0	0.0	0.0	0.0
SPIB	6689	symbol	H. sapiens	6689	H. sapiens	SPIB	Spi-B transcription factor	GO:0045944 positive regulation of transcription by RNA polymerase II;GO:0045893 positive regulation of transcription, DNA-templated;GO:1903508 positive regulation of nucleic acid-templated transcription		Transcription factors:Helix-turn-helix domains; Predicted intracellular proteins					0.0	0.0	0.0	0.0	0.0	0.0	0.0	0.0	0.0	0.0	0.0	0.0	0.0	0.0	0.0	0.0	0.0	0.0	0.0	0.0
SEL1L3	23231	symbol	H. sapiens	23231	H. sapiens	SEL1L3	SEL1L family member 3			Predicted intracellular proteins	Nucleoplasm (Enhanced)				0.0	0.0	0.0	0.0	0.0	0.0	0.0	0.0	0.0	0.0	0.0	0.0	0.0	0.0	0.0	0.0	0.0	0.0	0.0	0.0
AUTS2	26053	symbol	H. sapiens	26053	H. sapiens	AUTS2	activator of transcription and developmental regulator AUTS2	GO:2000620 positive regulation of histone H4-K16 acetylation;GO:0035022 positive regulation of Rac protein signal transduction;GO:2000618 regulation of histone H4-K16 acetylation		Disease related genes; Predicted intracellular proteins; Human disease related genes:Other diseases:Mental and behavioural disorders	Nucleoplasm (Approved); Additional: Cytosol			(M5913)HALLMARK INTERFERON GAMMA RESPONSE	0.0	0.0	0.0	0.0	0.0	0.0	0.0	0.0	0.0	0.0	0.0	0.0	0.0	0.0	0.0	0.0	1.0	0.0	0.0	0.0
HDAC9	9734	symbol	H. sapiens	9734	H. sapiens	HDAC9	histone deacetylase 9	GO:1990678 histone H4-K16 deacetylation;GO:0051005 negative regulation of lipoprotein lipase activity;GO:0034983 peptidyl-lysine deacetylation		ENZYME proteins:Hydrolases; Enzymes; Disease related genes; Predicted intracellular proteins; FDA approved drug targets:Small molecule drugs	Nucleoplasm (Approved)	Valproic acid	(M30)PID HDAC CLASSII PATHWAY; (M101)PID HDAC CLASSI PATHWAY	(M5950)HALLMARK ALLOGRAFT REJECTION; (M5953)HALLMARK KRAS SIGNALING UP	0.0	0.0	0.0	0.0	1.0	0.0	0.0	0.0	0.0	0.0	0.0	0.0	0.0	1.0	1.0	0.0	0.0	0.0	0.0	0.0
CD79B	974	symbol	H. sapiens	974	H. sapiens	CD79B	CD79b molecule	GO:0050853 B cell receptor signaling pathway;GO:0030183 B cell differentiation;GO:0042113 B cell activation		Cancer-related genes:Mutated cancer genes; Disease related genes; CD markers; Human disease related genes:Cancers:Cancers of haematopoietic and lymphoid tissues; Human disease related genes:Immune system diseases:Primary immunodeficiency; FDA approved drug targets:Biotech drugs	Plasma membrane (Supported); Additional: Cytosol;Nucleoplasm	Polatuzumab vedotin	(M10)PID BCR 5PATHWAY	(M5947)HALLMARK IL2 STAT5 SIGNALING	1.0	1.0	0.0	0.0	1.0	0.0	0.0	0.0	0.0	0.0	0.0	0.0	0.0	0.0	0.0	0.0	0.0	0.0	0.0	0.0
PLEKHG1	57480	symbol	H. sapiens	57480	H. sapiens	PLEKHG1	pleckstrin homology and RhoGEF domain containing G1	GO:0051056 regulation of small GTPase mediated signal transduction;GO:1902531 regulation of intracellular signal transduction;GO:0050790 regulation of catalytic activity		Predicted intracellular proteins	Nucleoplasm (Enhanced)				0.0	0.0	0.0	0.0	0.0	0.0	0.0	0.0	0.0	0.0	0.0	0.0	0.0	0.0	0.0	0.0	0.0	0.0	0.0	0.0
LINC00926	283663	symbol	H. sapiens	283663	H. sapiens	LINC00926	long intergenic non-protein coding RNA 926								0.0	0.0	0.0	0.0	0.0	0.0	0.0	0.0	0.0	0.0	0.0	0.0	0.0	0.0	0.0	0.0	0.0	0.0	0.0	0.0
CDK14	5218	symbol	H. sapiens	5218	H. sapiens	CDK14	cyclin dependent kinase 14	GO:0000083 regulation of transcription involved in G1/S transition of mitotic cell cycle;GO:0000086 G2/M transition of mitotic cell cycle;GO:0044839 cell cycle G2/M phase transition	CMGC Ser/Thr protein kinase family	ENZYME proteins:Transferases; Predicted intracellular proteins; Enzymes; Kinases:CMGC Ser/Thr protein kinases	Cytosol;Nucleoplasm (Supported)				0.0	0.0	0.0	0.0	0.0	0.0	0.0	0.0	0.0	0.0	0.0	0.0	1.0	0.0	0.0	0.0	0.0	0.0	0.0	0.0
WDFY4	57705	symbol	H. sapiens	57705	H. sapiens	WDFY4	WDFY family member 4	GO:0036037 CD8-positive, alpha-beta T cell activation;GO:0046631 alpha-beta T cell activation;GO:0098586 cellular response to virus		Predicted intracellular proteins	Nucleoplasm (Approved); Additional: Cytosol				0.0	1.0	0.0	0.0	1.0	0.0	0.0	0.0	0.0	0.0	0.0	0.0	0.0	0.0	0.0	0.0	0.0	0.0	0.0	0.0
ADAM28	10863	symbol	H. sapiens	10863	H. sapiens	ADAM28	ADAM metallopeptidase domain 28	GO:0007283 spermatogenesis;GO:0048232 male gamete generation;GO:0007276 gamete generation		Predicted secreted proteins; Transporters:Accessory Factors Involved in Transport	Plasma membrane (Approved); Additional: Mitochondria	N-[(Furan-2-Yl)Carbonyl]-(S)-Leucyl-(R)-[1-Amino-2(1h-Indol-3-Yl)Ethyl]-Phosphonic Acid; Furoyl-Leucine; Ilomastat; 2-(Thiomethylene)-4-Methylpentanoic Acid; Pidolic acid; Batimastat; (2R,3R)-N^1^-[(1S)-2,2-DIMETHYL-1-(METHYLCARBAMOYL)PROPYL]-N^4^-HYDROXY-2-(2-METHYLPROPYL)-3-{[(1,3-THIAZOL-2-YLCARBONYL)AMINO]METHYL}BUTANEDIAMIDE	(M277)PID INTEGRIN A4B1 PATHWAY; (M3468)NABA ECM REGULATORS; (M5885)NABA MATRISOME ASSOCIATED		0.0	0.0	0.0	0.0	0.0	0.0	0.0	0.0	0.0	0.0	0.0	0.0	0.0	0.0	0.0	0.0	0.0	0.0	0.0	0.0
ZEB2	9839	symbol	H. sapiens	9839	H. sapiens	ZEB2	zinc finger E-box binding homeobox 2	GO:0097324 melanocyte migration;GO:1903056 regulation of melanosome organization;GO:0045636 positive regulation of melanocyte differentiation		Disease related genes; Transcription factors:Helix-turn-helix domains; Predicted intracellular proteins; Human disease related genes:Congenital malformations:Other congenital malformations	Nucleoli (Supported); Additional: Cytosol;Nucleoplasm				0.0	0.0	1.0	0.0	0.0	0.0	0.0	0.0	0.0	0.0	0.0	0.0	0.0	0.0	0.0	0.0	0.0	0.0	1.0	0.0
LARGE1	9215	symbol	H. sapiens	9215	H. sapiens	LARGE1	LARGE xylosyl- and glucuronyltransferase 1	GO:0035269 protein O-linked mannosylation;GO:0006044 N-acetylglucosamine metabolic process;GO:0046716 muscle cell cellular homeostasis		Disease related genes; Human disease related genes:Congenital disorders of metabolism:Congenital disorders of glycan/glycoprotein metabolism; Predicted intracellular proteins				(M5891)HALLMARK HYPOXIA; (M5907)HALLMARK ESTROGEN RESPONSE LATE; (M5909)HALLMARK MYOGENESIS	0.0	0.0	0.0	0.0	0.0	0.0	1.0	0.0	0.0	0.0	0.0	0.0	0.0	0.0	0.0	0.0	0.0	0.0	0.0	0.0
STEAP1B	256227	symbol	H. sapiens	256227	H. sapiens	STEAP1B	STEAP family member 1B								0.0	0.0	0.0	0.0	0.0	0.0	0.0	0.0	0.0	0.0	0.0	0.0	0.0	0.0	0.0	0.0	0.0	0.0	0.0	0.0
AC120193.1						None	None	None	None	None	None	None	None	None	nan	nan	nan	nan	nan	nan	nan	nan	nan	nan	nan	nan	nan	nan	nan	nan	nan	nan	nan	nan
KHDRBS2	202559	symbol	H. sapiens	202559	H. sapiens	KHDRBS2	KH RNA binding domain containing, signal transduction associated 2	GO:0000381 regulation of alternative mRNA splicing, via spliceosome;GO:0048024 regulation of mRNA splicing, via spliceosome;GO:0050684 regulation of mRNA processing		Predicted intracellular proteins					0.0	0.0	0.0	0.0	0.0	0.0	0.0	0.0	0.0	0.0	0.0	0.0	0.0	0.0	0.0	0.0	0.0	0.0	0.0	0.0
FCER2	2208	symbol	H. sapiens	2208	H. sapiens	FCER2	Fc epsilon receptor II	GO:0051712 positive regulation of killing of cells of another organism;GO:0002925 positive regulation of humoral immune response mediated by circulating immunoglobulin;GO:0051709 regulation of killing of cells of another organism		Predicted intracellular proteins; Predicted secreted proteins; Cancer-related genes:Candidate cancer biomarkers; CD markers		Lumiliximab	(M28)PID IL4 2PATHWAY		1.0	1.0	0.0	0.0	0.0	1.0	0.0	0.0	0.0	0.0	1.0	0.0	0.0	0.0	1.0	0.0	0.0	0.0	0.0	0.0
GNG7	2788	symbol	H. sapiens	2788	H. sapiens	GNG7	G protein subunit gamma 7	GO:0008277 regulation of G protein-coupled receptor signaling pathway;GO:0007186 G protein-coupled receptor signaling pathway;GO:0009966 regulation of signal transduction		RAS pathway related proteins; Predicted intracellular proteins					0.0	0.0	0.0	0.0	0.0	0.0	0.0	0.0	1.0	1.0	0.0	0.0	0.0	0.0	0.0	0.0	0.0	0.0	0.0	0.0
AL050309.1						None	None	None	None	None	None	None	None	None	nan	nan	nan	nan	nan	nan	nan	nan	nan	nan	nan	nan	nan	nan	nan	nan	nan	nan	nan	nan
SETBP1	26040	symbol	H. sapiens	26040	H. sapiens	SETBP1	SET binding protein 1			Human disease related genes:Congenital malformations:Other congenital malformations; Cancer-related genes; Disease related genes; Human disease related genes:Cancers:Cancers of haematopoietic and lymphoid tissues; Predicted intracellular proteins; Human disease related genes:Other diseases:Mental and behavioural disorders	Nucleoplasm (Supported); Additional: Cytosol;Nuclear bodies				0.0	0.0	0.0	0.0	0.0	0.0	0.0	0.0	0.0	0.0	0.0	0.0	0.0	0.0	0.0	0.0	0.0	0.0	0.0	0.0
ARHGAP24	83478	symbol	H. sapiens	83478	H. sapiens	ARHGAP24	Rho GTPase activating protein 24	GO:0035021 negative regulation of Rac protein signal transduction;GO:1900028 negative regulation of ruffle assembly;GO:0035313 wound healing, spreading of epidermal cells		Predicted intracellular proteins	Cytosol;Plasma membrane (Approved)				0.0	0.0	0.0	0.0	0.0	0.0	0.0	0.0	1.0	0.0	0.0	0.0	0.0	0.0	0.0	0.0	0.0	1.0	0.0	0.0
BLNK	29760	symbol	H. sapiens	29760	H. sapiens	BLNK	B cell linker	GO:0050853 B cell receptor signaling pathway;GO:0030183 B cell differentiation;GO:0042113 B cell activation		Disease related genes; Human disease related genes:Immune system diseases:Primary immunodeficiency; Predicted intracellular proteins	Plasma membrane (Supported); Additional: Vesicles		(M17200)SA B CELL RECEPTOR COMPLEXES; (M8626)SIG BCR SIGNALING PATHWAY; (M141)PID PI3KCI PATHWAY		1.0	1.0	1.0	0.0	1.0	1.0	0.0	0.0	0.0	1.0	0.0	0.0	0.0	0.0	0.0	0.0	0.0	1.0	0.0	1.0
AP002075.1						None	None	None	None	None	None	None	None	None	nan	nan	nan	nan	nan	nan	nan	nan	nan	nan	nan	nan	nan	nan	nan	nan	nan	nan	nan	nan
DENND5B	160518	symbol	H. sapiens	160518	H. sapiens	DENND5B	DENN domain containing 5B	GO:1901508 positive regulation of acylglycerol transport;GO:1905885 positive regulation of triglyceride transport;GO:1901506 regulation of acylglycerol transport		Predicted intracellular proteins	Microtubules (Approved); Additional: Nucleoli				0.0	0.0	0.0	0.0	0.0	0.0	0.0	0.0	0.0	0.0	0.0	0.0	0.0	0.0	0.0	0.0	0.0	0.0	0.0	0.0
LTB	4050	symbol	H. sapiens	4050	H. sapiens	LTB	lymphotoxin beta	GO:0048535 lymph node development;GO:0032735 positive regulation of interleukin-12 production;GO:0032655 regulation of interleukin-12 production		Predicted intracellular proteins; Cancer-related genes:Candidate cancer biomarkers	Centrosome (Approved)		(M5883)NABA SECRETED FACTORS; (M5885)NABA MATRISOME ASSOCIATED; (M5889)NABA MATRISOME	(M5897)HALLMARK IL6 JAK STAT3 SIGNALING; (M5947)HALLMARK IL2 STAT5 SIGNALING; (M5950)HALLMARK ALLOGRAFT REJECTION	0.0	1.0	0.0	1.0	1.0	1.0	0.0	0.0	0.0	0.0	0.0	0.0	0.0	0.0	0.0	0.0	0.0	1.0	0.0	0.0
ACTG1	71	symbol	H. sapiens	71	H. sapiens	ACTG1	actin gamma 1	GO:0150111 regulation of transepithelial transport;GO:1902396 protein localization to bicellular tight junction;GO:0098974 postsynaptic actin cytoskeleton organization		Disease related genes; Human disease related genes:Nervous system diseases:Ear disease; Predicted intracellular proteins; Human disease related genes:Congenital malformations:Other congenital malformations		Copper; Artenimol	(M16801)SIG REGULATION OF THE ACTIN CYTOSKELETON BY RHO GTPASES	(M5892)HALLMARK CHOLESTEROL HOMEOSTASIS; (M5915)HALLMARK APICAL JUNCTION	1.0	1.0	0.0	0.0	1.0	0.0	1.0	0.0	1.0	1.0	0.0	0.0	0.0	1.0	0.0	1.0	1.0	0.0	0.0	0.0
MYO1E	4643	symbol	H. sapiens	4643	H. sapiens	MYO1E	myosin IE	GO:0035166 post-embryonic hemopoiesis;GO:0072015 podocyte development;GO:0032836 glomerular basement membrane development		Disease related genes; Human disease related genes:Urinary system diseases:Kidney diseases; Predicted intracellular proteins	Nucleoplasm;Plasma membrane (Approved); Additional: Cytosol	Imidazole		(M5893)HALLMARK MITOTIC SPINDLE; (M5947)HALLMARK IL2 STAT5 SIGNALING	1.0	0.0	0.0	0.0	1.0	0.0	0.0	0.0	1.0	0.0	0.0	0.0	0.0	0.0	0.0	0.0	1.0	0.0	1.0	1.0
CD22	933	symbol	H. sapiens	933	H. sapiens	CD22	CD22 molecule	GO:0050859 negative regulation of B cell receptor signaling pathway;GO:0002638 negative regulation of immunoglobulin production;GO:0050849 negative regulation of calcium-mediated signaling		Predicted intracellular proteins; FDA approved drug targets:Biotech drugs; CD markers		Epratuzumab; Inotuzumab ozogamicin; Moxetumomab Pasudotox	(M8626)SIG BCR SIGNALING PATHWAY; (M10)PID BCR 5PATHWAY		0.0	1.0	1.0	1.0	1.0	0.0	0.0	0.0	0.0	1.0	1.0	0.0	0.0	0.0	1.0	0.0	0.0	1.0	0.0	0.0
CR1	1378	symbol	H. sapiens	1378	H. sapiens	CR1	complement C3b/C4b receptor 1 (Knops blood group)	GO:0002435 immune complex clearance by erythrocytes;GO:1900099 negative regulation of plasma cell differentiation;GO:0001970 positive regulation of activation of membrane attack complex		Blood group antigen proteins; CD markers				(M5921)HALLMARK COMPLEMENT	1.0	1.0	1.0	1.0	0.0	0.0	0.0	0.0	0.0	1.0	1.0	0.0	0.0	0.0	1.0	1.0	0.0	0.0	0.0	0.0
KCNQ5	56479	symbol	H. sapiens	56479	H. sapiens	KCNQ5	potassium voltage-gated channel subfamily Q member 5	GO:0071805 potassium ion transmembrane transport;GO:0006813 potassium ion transport;GO:0034765 regulation of ion transmembrane transport		Disease related genes; Voltage-gated ion channels:Voltage-Gated Potassium Channels; Potential drug targets; Predicted intracellular proteins; Human disease related genes:Other diseases:Mental and behavioural disorders	Vesicles (Approved)	Gabapentin; Ezogabine; ICA-105665			0.0	0.0	0.0	0.0	0.0	0.0	0.0	0.0	0.0	0.0	0.0	0.0	0.0	0.0	0.0	0.0	0.0	1.0	0.0	0.0
LYN	4067	symbol	H. sapiens	4067	H. sapiens	LYN	LYN proto-oncogene, Src family tyrosine kinase	GO:0070668 positive regulation of mast cell proliferation;GO:0070667 negative regulation of mast cell proliferation;GO:0002349 histamine production involved in inflammatory response	Tyr protein kinase family	Predicted intracellular proteins; ENZYME proteins:Transferases; Disease related genes; Kinases:Tyr protein kinases; Potential drug targets; Cancer-related genes:Mutational cancer driver genes; Enzymes	Golgi apparatus;Plasma membrane (Supported); Additional: Vesicles	Dasatinib; 1-Tert-Butyl-3-(4-Chloro-Phenyl)-1h-Pyrazolo[3,4-D]Pyrimidin-4-Ylamine; Bosutinib; Ponatinib; Nintedanib; Fostamatinib	(M135)PID IL5 PATHWAY; (M17200)SA B CELL RECEPTOR COMPLEXES; (M33)PID GLYPICAN 1PATHWAY	(M5916)HALLMARK APICAL SURFACE; (M5941)HALLMARK UV RESPONSE UP; (M5921)HALLMARK COMPLEMENT	1.0	1.0	0.0	1.0	1.0	1.0	1.0	0.0	1.0	1.0	1.0	1.0	1.0	0.0	1.0	1.0	0.0	1.0	1.0	1.0
RUBCNL	80183	symbol	H. sapiens	80183	H. sapiens	RUBCNL	rubicon like autophagy enhancer	GO:0061910 autophagosome-endosome fusion;GO:0061909 autophagosome-lysosome fusion;GO:0070873 regulation of glycogen metabolic process		Predicted intracellular proteins	Cytosol (Approved)				0.0	0.0	0.0	0.0	0.0	0.0	0.0	0.0	0.0	0.0	0.0	0.0	0.0	0.0	0.0	0.0	0.0	0.0	0.0	0.0
CD83	9308	symbol	H. sapiens	9308	H. sapiens	CD83	CD83 molecule	GO:0032713 negative regulation of interleukin-4 production;GO:0043372 positive regulation of CD4-positive, alpha-beta T cell differentiation;GO:0032673 regulation of interleukin-4 production		CD markers	Vesicles (Approved); Additional: Golgi apparatus			(M5947)HALLMARK IL2 STAT5 SIGNALING; (M5890)HALLMARK TNFA SIGNALING VIA NFKB	1.0	1.0	0.0	1.0	0.0	0.0	0.0	0.0	0.0	0.0	1.0	0.0	0.0	0.0	1.0	0.0	0.0	0.0	0.0	0.0
MEF2C	4208	symbol	H. sapiens	4208	H. sapiens	MEF2C	myocyte enhancer factor 2C	GO:0003185 sinoatrial valve morphogenesis;GO:0003172 sinoatrial valve development;GO:0007521 muscle cell fate determination		Transcription factors:alpha-Helices exposed by beta-structures; Disease related genes; Human disease related genes:Other congenital disorders:Chromosomal abnormalities; Predicted intracellular proteins; Human disease related genes:Other diseases:Mental and behavioural disorders	Nucleoplasm;Vesicles (Supported)		(M30)PID HDAC CLASSII PATHWAY; (M270)PID MAPK TRK PATHWAY; (M229)PID P38 ALPHA BETA DOWNSTREAM PATHWAY	(M5909)HALLMARK MYOGENESIS	1.0	1.0	0.0	1.0	1.0	1.0	1.0	1.0	1.0	1.0	1.0	0.0	0.0	1.0	0.0	0.0	0.0	1.0	1.0	0.0
LINC02397	100507616	symbol	H. sapiens	100507616	H. sapiens	LINC02397	long intergenic non-protein coding RNA 2397								0.0	0.0	0.0	0.0	0.0	0.0	0.0	0.0	0.0	0.0	0.0	0.0	0.0	0.0	0.0	0.0	0.0	0.0	0.0	0.0
PELI1	57162	symbol	H. sapiens	57162	H. sapiens	PELI1	pellino E3 ubiquitin protein ligase 1	GO:0008592 regulation of Toll signaling pathway;GO:0034141 positive regulation of toll-like receptor 3 signaling pathway;GO:0034139 regulation of toll-like receptor 3 signaling pathway		ENZYME proteins:Transferases; Predicted intracellular proteins; Enzymes	Intermediate filaments;Nucleoli;Nucleoplasm (Approved)			(M5913)HALLMARK INTERFERON GAMMA RESPONSE	1.0	1.0	0.0	1.0	0.0	1.0	0.0	0.0	0.0	0.0	0.0	0.0	0.0	0.0	1.0	0.0	0.0	0.0	0.0	0.0
CPED1	79974	symbol	H. sapiens	79974	H. sapiens	CPED1	cadherin like and PC-esterase domain containing 1			Predicted intracellular proteins	Nucleoplasm (Approved)				0.0	0.0	0.0	0.0	0.0	0.0	0.0	0.0	0.0	0.0	0.0	0.0	0.0	0.0	0.0	0.0	0.0	0.0	0.0	0.0
TMSB4X	7114	symbol	H. sapiens	7114	H. sapiens	TMSB4X	thymosin beta 4 X-linked	GO:1905271 regulation of proton-transporting ATP synthase activity, rotational mechanism;GO:1905273 positive regulation of proton-transporting ATP synthase activity, rotational mechanism;GO:1903026 negative regulation of RNA polymerase II regulatory region sequence-specific DNA binding		Predicted intracellular proteins	Cytosol;Nucleoplasm;Vesicles (Approved)				0.0	0.0	0.0	0.0	0.0	0.0	0.0	0.0	1.0	1.0	0.0	0.0	0.0	1.0	1.0	0.0	1.0	1.0	0.0	0.0
TBC1D9	23158	symbol	H. sapiens	23158	H. sapiens	TBC1D9	TBC1 domain family member 9	GO:0090630 activation of GTPase activity;GO:0043547 positive regulation of GTPase activity;GO:0043087 regulation of GTPase activity		Predicted intracellular proteins	Cytosol (Approved)				0.0	0.0	0.0	0.0	0.0	0.0	0.0	0.0	0.0	0.0	0.0	0.0	0.0	0.0	0.0	0.0	0.0	0.0	0.0	0.0
VPREB3	29802	symbol	H. sapiens	29802	H. sapiens	VPREB3	V-set pre-B cell surrogate light chain 3	GO:0002377 immunoglobulin production;GO:0002440 production of molecular mediator of immune response;GO:0006955 immune response		Predicted intracellular proteins					0.0	1.0	0.0	0.0	0.0	0.0	0.0	0.0	0.0	1.0	0.0	0.0	0.0	0.0	0.0	0.0	0.0	0.0	0.0	0.0
HIST1H4C	8364	gene_synonym	H. sapiens	8364	H. sapiens	H4C3	H4 clustered histone 3	GO:0061644 protein localization to CENP-A containing chromatin;GO:0045653 negative regulation of megakaryocyte differentiation;GO:0006335 DNA replication-dependent chromatin assembly		Disease related genes; Predicted intracellular proteins				(M5945)HALLMARK HEME METABOLISM	0.0	1.0	0.0	0.0	0.0	0.0	1.0	0.0	1.0	0.0	1.0	0.0	0.0	0.0	0.0	0.0	0.0	0.0	0.0	0.0
FCHSD2	9873	symbol	H. sapiens	9873	H. sapiens	FCHSD2	FCH and double SH3 domains 2	GO:2000601 positive regulation of Arp2/3 complex-mediated actin nucleation;GO:0051127 positive regulation of actin nucleation;GO:0007274 neuromuscular synaptic transmission		Predicted intracellular proteins	Actin filaments;Plasma membrane (Approved); Additional: Focal adhesion sites;Nuclear speckles				1.0	0.0	0.0	0.0	0.0	0.0	0.0	0.0	0.0	0.0	0.0	0.0	0.0	0.0	0.0	0.0	1.0	0.0	0.0	0.0
TPD52	7163	symbol	H. sapiens	7163	H. sapiens	TPD52	tumor protein D52	GO:0030183 B cell differentiation;GO:0042113 B cell activation;GO:0030098 lymphocyte differentiation		Predicted intracellular proteins; Cancer-related genes:Candidate cancer biomarkers	Cytosol (Approved); Additional: Golgi apparatus			(M5910)HALLMARK PROTEIN SECRETION; (M5908)HALLMARK ANDROGEN RESPONSE; (M5891)HALLMARK HYPOXIA	0.0	0.0	0.0	0.0	1.0	0.0	0.0	0.0	0.0	0.0	0.0	0.0	0.0	0.0	0.0	0.0	0.0	0.0	0.0	0.0
CSGALNACT1	55790	symbol	H. sapiens	55790	H. sapiens	CSGALNACT1	chondroitin sulfate N-acetylgalactosaminyltransferase 1	GO:0046398 UDP-glucuronate metabolic process;GO:0050653 chondroitin sulfate proteoglycan biosynthetic process, polysaccharide chain biosynthetic process;GO:0019276 UDP-N-acetylgalactosamine metabolic process		Enzymes; ENZYME proteins:Transferases; Disease related genes; Potential drug targets; Predicted intracellular proteins	Cytosol (Approved); Additional: Golgi apparatus				0.0	0.0	0.0	0.0	0.0	0.0	1.0	0.0	0.0	0.0	0.0	0.0	0.0	0.0	0.0	0.0	0.0	0.0	0.0	0.0
GRK3	157	symbol	H. sapiens	157	H. sapiens	GRK3	G protein-coupled receptor kinase 3	GO:0002029 desensitization of G protein-coupled receptor signaling pathway;GO:0022401 negative adaptation of signaling pathway;GO:0023058 adaptation of signaling pathway	AGC Ser/Thr protein kinase family	ENZYME proteins:Transferases; Predicted intracellular proteins; Enzymes; Kinases:AGC Ser/Thr protein kinases	Nucleoplasm (Approved); Additional: Plasma membrane	ATP	(M238)PID THROMBIN PAR1 PATHWAY; (M99)PID TXA2PATHWAY		1.0	0.0	0.0	0.0	0.0	0.0	0.0	0.0	1.0	1.0	0.0	0.0	1.0	0.0	0.0	0.0	0.0	0.0	0.0	0.0
AL592429.2						None	None	None	None	None	None	None	None	None	nan	nan	nan	nan	nan	nan	nan	nan	nan	nan	nan	nan	nan	nan	nan	nan	nan	nan	nan	nan
ANGPTL1	9068	symbol	H. sapiens	9068	H. sapiens	ANGPTL1	angiopoietin like 1	GO:0007169 transmembrane receptor protein tyrosine kinase signaling pathway;GO:0007167 enzyme-linked receptor protein signaling pathway;GO:0007166 cell surface receptor signaling pathway		Predicted secreted proteins			(M5883)NABA SECRETED FACTORS; (M5885)NABA MATRISOME ASSOCIATED; (M5889)NABA MATRISOME		0.0	0.0	0.0	0.0	0.0	0.0	0.0	0.0	0.0	0.0	0.0	0.0	0.0	0.0	0.0	0.0	0.0	0.0	0.0	1.0
NCF1	653361	symbol	H. sapiens	653361	H. sapiens	NCF1	neutrophil cytosolic factor 1	GO:0060264 regulation of respiratory burst involved in inflammatory response;GO:0045741 positive regulation of epidermal growth factor-activated receptor activity;GO:1903409 reactive oxygen species biosynthetic process		Disease related genes; Human disease related genes:Immune system diseases:Primary immunodeficiency; Predicted intracellular proteins			(M278)PID RAC1 PATHWAY		0.0	1.0	0.0	0.0	1.0	0.0	1.0	0.0	1.0	1.0	1.0	1.0	0.0	1.0	0.0	0.0	0.0	0.0	0.0	0.0
AC008014.1						None	None	None	None	None	None	None	None	None	nan	nan	nan	nan	nan	nan	nan	nan	nan	nan	nan	nan	nan	nan	nan	nan	nan	nan	nan	nan
BCL2	596	symbol	H. sapiens	596	H. sapiens	BCL2	BCL2 apoptosis regulator	GO:0032848 negative regulation of cellular pH reduction;GO:0046671 negative regulation of retinal cell programmed cell death;GO:0043375 CD8-positive, alpha-beta T cell lineage commitment		Human disease related genes:Cancers:Cancers of soft tissues and bone; Predicted intracellular proteins; Human disease related genes:Cancers:Head and neck cancers; Transporters:Transporter channels and pores; Disease related genes; Human disease related genes:Cancers:Cancers of the lung and pleura; Human disease related genes:Cancers:Cancers of haematopoietic and lymphoid tissues; Cancer-related g…	Nuclear membrane (Supported); Additional: Nucleoplasm	Ibuprofen; Paclitaxel; Docetaxel; Rasagiline; Paclitaxel docosahexaenoic acid; Apoptone; Glycine betaine; Eribulin; Dexibuprofen; Isosorbide; Venetoclax; Obatoclax; Navitoclax	(M5060)SA FAS SIGNALING; (M13096)SA PROGRAMMED CELL DEATH; (M162)PID RXR VDR PATHWAY	(M5947)HALLMARK IL2 STAT5 SIGNALING; (M5891)HALLMARK HYPOXIA; (M5906)HALLMARK ESTROGEN RESPONSE EARLY	1.0	1.0	0.0	1.0	1.0	1.0	0.0	1.0	1.0	1.0	0.0	0.0	1.0	1.0	0.0	0.0	1.0	1.0	1.0	0.0
FCRL2	79368	symbol	H. sapiens	79368	H. sapiens	FCRL2	Fc receptor like 2	GO:0007267 cell-cell signaling;GO:0007166 cell surface receptor signaling pathway;GO:0007165 signal transduction		CD markers					0.0	0.0	0.0	0.0	0.0	0.0	0.0	0.0	0.0	0.0	0.0	0.0	0.0	0.0	0.0	0.0	0.0	0.0	0.0	0.0
LYST	1130	symbol	H. sapiens	1130	H. sapiens	LYST	lysosomal trafficking regulator	GO:0033364 mast cell secretory granule organization;GO:0032510 endosome to lysosome transport via multivesicular body sorting pathway;GO:0042832 defense response to protozoan		Disease related genes; Human disease related genes:Immune system diseases:Primary immunodeficiency; Predicted intracellular proteins	Nucleoplasm (Supported); Additional: Centriolar satellite;Plasma membrane				1.0	1.0	0.0	0.0	0.0	0.0	0.0	0.0	0.0	0.0	0.0	0.0	0.0	0.0	0.0	0.0	0.0	0.0	1.0	0.0
UBE2E2	7325	symbol	H. sapiens	7325	H. sapiens	UBE2E2	ubiquitin conjugating enzyme E2 E2	GO:0032020 ISG15-protein conjugation;GO:0070979 protein K11-linked ubiquitination;GO:0070534 protein K63-linked ubiquitination		ENZYME proteins:Transferases; Predicted intracellular proteins; Enzymes	Nucleoplasm (Approved)				0.0	0.0	0.0	0.0	1.0	0.0	0.0	0.0	0.0	0.0	0.0	0.0	0.0	0.0	0.0	0.0	0.0	0.0	0.0	0.0
MARCH3	115123	gene_synonym	H. sapiens	115123	H. sapiens	MARCHF3	membrane associated ring-CH-type finger 3	GO:0006897 endocytosis;GO:0016567 protein ubiquitination;GO:0032446 protein modification by small protein conjugation		ENZYME proteins:Transferases; Predicted intracellular proteins; Enzymes	Vesicles (Supported)				1.0	0.0	0.0	0.0	0.0	0.0	0.0	0.0	0.0	0.0	0.0	0.0	0.0	0.0	0.0	0.0	0.0	0.0	0.0	0.0
BACH2	60468	symbol	H. sapiens	60468	H. sapiens	BACH2	BTB domain and CNC homolog 2	GO:0090720 primary adaptive immune response;GO:0090721 primary adaptive immune response involving T cells and B cells;GO:0051170 import into nucleus		Disease related genes; Transcription factors:Basic domains; Predicted intracellular proteins; Human disease related genes:Endocrine and metabolic diseases:Diabetes	Nucleoplasm (Supported); Additional: Cytosol				0.0	1.0	1.0	0.0	0.0	0.0	0.0	0.0	0.0	0.0	0.0	0.0	0.0	0.0	0.0	0.0	0.0	0.0	0.0	0.0
HLA-DMA	3108	symbol	H. sapiens	3108	H. sapiens	HLA-DMA	major histocompatibility complex, class II, DM alpha	GO:0002399 MHC class II protein complex assembly;GO:0002503 peptide antigen assembly with MHC class II protein complex;GO:0002396 MHC protein complex assembly		Predicted intracellular proteins; Human disease related genes:Immune system diseases:Allergies and autoimmune diseases	Vesicles (Approved)			(M5913)HALLMARK INTERFERON GAMMA RESPONSE; (M5950)HALLMARK ALLOGRAFT REJECTION	0.0	1.0	0.0	0.0	0.0	0.0	0.0	0.0	0.0	0.0	0.0	0.0	0.0	0.0	0.0	0.0	0.0	0.0	0.0	0.0
SWAP70	23075	symbol	H. sapiens	23075	H. sapiens	SWAP70	switching B cell complex subunit SWAP70	GO:0033633 negative regulation of cell-cell adhesion mediated by integrin;GO:1902309 negative regulation of peptidyl-serine dephosphorylation;GO:1902308 regulation of peptidyl-serine dephosphorylation		Predicted intracellular proteins	Plasma membrane (Supported); Additional: Actin filaments			(M5947)HALLMARK IL2 STAT5 SIGNALING	0.0	1.0	0.0	0.0	1.0	0.0	0.0	0.0	0.0	1.0	0.0	0.0	0.0	0.0	1.0	0.0	1.0	1.0	0.0	0.0
STAP1	26228	symbol	H. sapiens	26228	H. sapiens	STAP1	signal transducing adaptor family member 1	GO:1904140 negative regulation of microglial cell migration;GO:1902227 negative regulation of macrophage colony-stimulating factor signaling pathway;GO:1903976 negative regulation of glial cell migration		Predicted intracellular proteins	Nucleoplasm;Vesicles (Uncertain)		(M231)PID KIT PATHWAY		1.0	1.0	0.0	0.0	0.0	0.0	0.0	0.0	0.0	1.0	1.0	0.0	0.0	0.0	1.0	0.0	1.0	1.0	0.0	1.0
MARCH1	55016	gene_synonym	H. sapiens	55016	H. sapiens	MARCHF1	membrane associated ring-CH-type finger 1	GO:0002495 antigen processing and presentation of peptide antigen via MHC class II;GO:0002504 antigen processing and presentation of peptide or polysaccharide antigen via MHC class II;GO:0048002 antigen processing and presentation of peptide antigen		ENZYME proteins:Transferases; Predicted intracellular proteins; Enzymes; Transporters:Accessory Factors Involved in Transport	Vesicles (Supported); Additional: Endoplasmic reticulum;Golgi apparatus			(M5913)HALLMARK INTERFERON GAMMA RESPONSE	0.0	1.0	0.0	0.0	0.0	0.0	0.0	0.0	0.0	0.0	0.0	0.0	0.0	0.0	0.0	0.0	0.0	0.0	0.0	0.0
STRBP	55342	symbol	H. sapiens	55342	H. sapiens	STRBP	spermatid perinuclear RNA binding protein	GO:0007638 mechanosensory behavior;GO:0007286 spermatid development;GO:0048515 spermatid differentiation		Predicted intracellular proteins				(M5951)HALLMARK SPERMATOGENESIS	0.0	0.0	0.0	0.0	0.0	0.0	0.0	0.0	0.0	0.0	0.0	0.0	0.0	0.0	0.0	0.0	0.0	0.0	0.0	0.0
ADAM19	8728	symbol	H. sapiens	8728	H. sapiens	ADAM19	ADAM metallopeptidase domain 19	GO:2000049 positive regulation of cell-cell adhesion mediated by cadherin;GO:0042987 amyloid precursor protein catabolic process;GO:0006509 membrane protein ectodomain proteolysis			Vesicles (Approved)		(M3468)NABA ECM REGULATORS; (M5885)NABA MATRISOME ASSOCIATED; (M5889)NABA MATRISOME	(M5947)HALLMARK IL2 STAT5 SIGNALING	0.0	1.0	0.0	0.0	0.0	0.0	0.0	0.0	0.0	0.0	0.0	0.0	0.0	0.0	0.0	0.0	0.0	0.0	0.0	0.0
RASGRP3	25780	symbol	H. sapiens	25780	H. sapiens	RASGRP3	RAS guanyl releasing protein 3	GO:0000165 MAPK cascade;GO:0007265 Ras protein signal transduction;GO:0007264 small GTPase mediated signal transduction		RAS pathway related proteins; Predicted intracellular proteins	Nucleoplasm (Approved); Additional: Golgi apparatus		(M269)PID RAS PATHWAY		0.0	0.0	0.0	0.0	1.0	0.0	0.0	0.0	0.0	0.0	0.0	0.0	0.0	0.0	0.0	0.0	0.0	0.0	0.0	0.0
PALM2-AKAP2	445815	gene_synonym	H. sapiens	445815	H. sapiens	PALM2AKAP2	PALM2 and AKAP2 fusion	GO:0008360 regulation of cell shape;GO:0022604 regulation of cell morphogenesis;GO:0022603 regulation of anatomical structure morphogenesis		Predicted intracellular proteins	Plasma membrane (Approved); Additional: Nuclear bodies;Nucleoplasm				0.0	0.0	0.0	0.0	0.0	0.0	0.0	0.0	0.0	0.0	0.0	0.0	0.0	1.0	0.0	0.0	0.0	0.0	0.0	0.0
CAMK2D	817	symbol	H. sapiens	817	H. sapiens	CAMK2D	calcium/calmodulin dependent protein kinase II delta	GO:1901897 regulation of relaxation of cardiac muscle;GO:0098909 regulation of cardiac muscle cell action potential involved in regulation of contraction;GO:1901725 regulation of histone deacetylase activity	CAMK Ser/Thr protein kinase family	ENZYME proteins:Transferases; Predicted intracellular proteins; Enzymes; Kinases:CAMK Ser/Thr protein kinases	Plasma membrane (Approved); Additional: Cell Junctions;Cytosol	2-[4-[4-[(5-cyclopropyl-1H-pyrazol-3-yl)amino]quinazolin-2-yl]iminocyclohexa-2,5-dien-1-yl]acetonitrile; (3Z)-N,N-DIMETHYL-2-OXO-3-(4,5,6,7-TETRAHYDRO-1H-INDOL-2-YLMETHYLIDENE)-2,3-DIHYDRO-1H-INDOLE-5-SULFONAMIDE; Fostamatinib	(M161)PID IFNG PATHWAY; (M288)PID HES HEY PATHWAY		0.0	1.0	0.0	0.0	0.0	1.0	1.0	0.0	1.0	1.0	0.0	0.0	1.0	0.0	0.0	0.0	1.0	1.0	0.0	0.0
FUT8	2530	symbol	H. sapiens	2530	H. sapiens	FUT8	fucosyltransferase 8	GO:0033578 protein glycosylation in Golgi;GO:0036071 N-glycan fucosylation;GO:0046368 GDP-L-fucose metabolic process		Predicted intracellular proteins; ENZYME proteins:Transferases; Disease related genes; Potential drug targets; Human disease related genes:Congenital disorders of metabolism:Congenital disorders of carbohydrate metabolism; Enzymes	Golgi apparatus (Approved); Additional: Cytosol;Nucleoplasm			(M5937)HALLMARK GLYCOLYSIS	0.0	0.0	0.0	0.0	0.0	0.0	1.0	0.0	0.0	1.0	0.0	0.0	0.0	0.0	0.0	0.0	0.0	0.0	0.0	1.0
MT-CO1	4512	gene_synonym	H. sapiens	4512	H. sapiens	COX1	cytochrome c oxidase subunit I	GO:0015988 energy coupled proton transmembrane transport, against electrochemical gradient;GO:0015990 electron transport coupled proton transport;GO:0006123 mitochondrial electron transport, cytochrome c to oxygen		Human disease related genes:Nervous system diseases:Neurodegenerative diseases; Disease related genes; ENZYME proteins; Transporters:Primary Active Transporters; Potential drug targets; Enzymes; Human disease related genes:Congenital disorders of metabolism:Mitochondrial diseases	Mitochondria (Supported)	Cholic Acid; N-Formylmethionine; Oxygen			0.0	0.0	0.0	0.0	0.0	0.0	1.0	0.0	0.0	0.0	0.0	0.0	0.0	0.0	0.0	0.0	0.0	0.0	0.0	0.0
TMSB10	9168	symbol	H. sapiens	9168	H. sapiens	TMSB10	thymosin beta 10	GO:0042989 sequestering of actin monomers;GO:0030837 negative regulation of actin filament polymerization;GO:0032507 maintenance of protein location in cell		Predicted intracellular proteins					0.0	0.0	1.0	0.0	0.0	0.0	0.0	0.0	0.0	0.0	0.0	0.0	0.0	1.0	0.0	0.0	1.0	0.0	0.0	0.0
CYB561A3	220002	symbol	H. sapiens	220002	H. sapiens	CYB561A3	cytochrome b561 family member A3	GO:0006879 cellular iron ion homeostasis;GO:0055072 iron ion homeostasis;GO:0046916 cellular transition metal ion homeostasis			Vesicles (Approved); Additional: Nucleoli				0.0	0.0	0.0	0.0	0.0	0.0	0.0	0.0	0.0	0.0	0.0	0.0	0.0	0.0	0.0	0.0	0.0	0.0	0.0	0.0
PIK3AP1	118788	symbol	H. sapiens	118788	H. sapiens	PIK3AP1	phosphoinositide-3-kinase adaptor protein 1	GO:0034134 toll-like receptor 2 signaling pathway;GO:0034154 toll-like receptor 7 signaling pathway;GO:0034162 toll-like receptor 9 signaling pathway		Predicted intracellular proteins	Cytosol (Approved); Additional: Nucleoplasm;Plasma membrane				1.0	0.0	0.0	0.0	1.0	0.0	0.0	0.0	0.0	1.0	0.0	0.0	0.0	0.0	0.0	0.0	0.0	0.0	0.0	0.0
UST	10090	symbol	H. sapiens	10090	H. sapiens	UST	uronyl 2-sulfotransferase	GO:0030208 dermatan sulfate biosynthetic process;GO:0030205 dermatan sulfate metabolic process;GO:0006477 protein sulfation							0.0	0.0	0.0	0.0	0.0	0.0	1.0	0.0	0.0	0.0	0.0	0.0	0.0	0.0	0.0	0.0	0.0	0.0	0.0	0.0
PIP5K1B	8395	symbol	H. sapiens	8395	H. sapiens	PIP5K1B	phosphatidylinositol-4-phosphate 5-kinase type 1 beta	GO:0046854 phosphatidylinositol phosphate biosynthetic process;GO:0014066 regulation of phosphatidylinositol 3-kinase signaling;GO:0006661 phosphatidylinositol biosynthetic process		ENZYME proteins:Transferases; Predicted intracellular proteins; Enzymes	Nucleoplasm (Approved); Additional: Vesicles		(M90)PID WNT CANONICAL PATHWAY; (M12)PID RHOA PATHWAY; (M278)PID RAC1 PATHWAY		0.0	0.0	0.0	0.0	1.0	0.0	0.0	0.0	1.0	0.0	0.0	1.0	0.0	0.0	0.0	0.0	0.0	0.0	0.0	0.0
PTK2	5747	symbol	H. sapiens	5747	H. sapiens	PTK2	protein tyrosine kinase 2	GO:0120041 positive regulation of macrophage proliferation;GO:0035995 detection of muscle stretch;GO:0120040 regulation of macrophage proliferation	Tyr protein kinase family	Predicted intracellular proteins; ENZYME proteins:Transferases; Disease related genes; Kinases:Tyr protein kinases; Potential drug targets; Enzymes; Cancer-related genes:Candidate cancer biomarkers	Focal adhesion sites (Supported); Additional: Cytosol;Vesicles	Endostatin; 7-PYRIDIN-2-YL-N-(3,4,5-TRIMETHOXYPHENYL)-7H-PYRROLO[2,3-D]PYRIMIDIN-2-AMINE; 2-({5-CHLORO-2-[(2-METHOXY-4-MORPHOLIN-4-YLPHENYL)AMINO]PYRIMIDIN-4-YL}AMINO)-N-METHYLBENZAMIDE; Fostamatinib	(M273)PID EPHA2 FWD PATHWAY; (M125)PID IGF1 PATHWAY; (M72)PID NECTIN PATHWAY	(M5944)HALLMARK ANGIOGENESIS; (M5902)HALLMARK APOPTOSIS; (M5915)HALLMARK APICAL JUNCTION	1.0	1.0	0.0	1.0	0.0	0.0	1.0	1.0	1.0	1.0	0.0	0.0	1.0	1.0	1.0	0.0	1.0	0.0	0.0	1.0
MCTP2	55784	symbol	H. sapiens	55784	H. sapiens	MCTP2	multiple C2 and transmembrane domain containing 2	GO:0046928 regulation of neurotransmitter secretion;GO:0051588 regulation of neurotransmitter transport;GO:0019722 calcium-mediated signaling		Disease related genes; Predicted intracellular proteins; Transporters; Potential drug targets	Cytosol;Nucleoplasm (Enhanced)				0.0	0.0	0.0	0.0	0.0	0.0	0.0	0.0	0.0	0.0	0.0	0.0	0.0	0.0	0.0	0.0	0.0	0.0	0.0	0.0
HLA-DMB	3109	symbol	H. sapiens	3109	H. sapiens	HLA-DMB	major histocompatibility complex, class II, DM beta	GO:2001190 positive regulation of T cell activation via T cell receptor contact with antigen bound to MHC molecule on antigen presenting cell;GO:2001188 regulation of T cell activation via T cell receptor contact with antigen bound to MHC molecule on antigen presenting cell;GO:0002399 MHC class II protein complex assembly		Predicted intracellular proteins	Vesicles (Supported)			(M5950)HALLMARK ALLOGRAFT REJECTION	1.0	1.0	0.0	1.0	1.0	0.0	0.0	0.0	0.0	0.0	1.0	0.0	0.0	0.0	0.0	0.0	0.0	0.0	0.0	0.0
EAF2	55840	symbol	H. sapiens	55840	H. sapiens	EAF2	ELL associated factor 2	GO:0060770 negative regulation of epithelial cell proliferation involved in prostate gland development;GO:0060768 regulation of epithelial cell proliferation involved in prostate gland development;GO:2000242 negative regulation of reproductive process		Predicted intracellular proteins					0.0	0.0	0.0	0.0	0.0	0.0	0.0	0.0	0.0	0.0	0.0	0.0	0.0	0.0	0.0	0.0	0.0	0.0	0.0	0.0
CIITA	4261	symbol	H. sapiens	4261	H. sapiens	CIITA	class II major histocompatibility complex transactivator	GO:0045345 positive regulation of MHC class I biosynthetic process;GO:0045343 regulation of MHC class I biosynthetic process;GO:0045348 positive regulation of MHC class II biosynthetic process		Predicted intracellular proteins; Cancer-related genes; ENZYME proteins:Transferases; Disease related genes; Potential drug targets; Human disease related genes:Immune system diseases:Primary immunodeficiency; Enzymes	Nucleoplasm (Supported)			(M5913)HALLMARK INTERFERON GAMMA RESPONSE	0.0	1.0	0.0	0.0	0.0	1.0	0.0	0.0	0.0	0.0	0.0	0.0	1.0	0.0	0.0	0.0	0.0	0.0	0.0	0.0
SLC9A7	84679	symbol	H. sapiens	84679	H. sapiens	SLC9A7	solute carrier family 9 member A7	GO:1905526 regulation of Golgi lumen acidification;GO:0032847 regulation of cellular pH reduction;GO:0098719 sodium ion import across plasma membrane		Disease related genes; Transporters:Electrochemical Potential-driven transporters; Potential drug targets; Human disease related genes:Other diseases:Mental and behavioural disorders	Vesicles (Supported)				0.0	0.0	0.0	0.0	0.0	0.0	0.0	0.0	0.0	0.0	0.0	0.0	0.0	0.0	0.0	0.0	0.0	0.0	0.0	0.0
TRIO	7204	symbol	H. sapiens	7204	H. sapiens	TRIO	trio Rho guanine nucleotide exchange factor	GO:0007185 transmembrane receptor protein tyrosine phosphatase signaling pathway;GO:0045599 negative regulation of fat cell differentiation;GO:0045598 regulation of fat cell differentiation	CAMK Ser/Thr protein kinase family	Predicted intracellular proteins; Kinases:CAMK Ser/Thr protein kinases; ENZYME proteins:Transferases; Disease related genes; Potential drug targets; Cancer-related genes:Mutational cancer driver genes; Enzymes; Human disease related genes:Other diseases:Mental and behavioural disorders	Cytosol (Approved); Additional: Vesicles		(M108)PID NETRIN PATHWAY; (M241)PID RAC1 REG PATHWAY; (M68)PID RHOA REG PATHWAY	(M5893)HALLMARK MITOTIC SPINDLE	0.0	0.0	0.0	0.0	0.0	0.0	1.0	0.0	0.0	0.0	0.0	0.0	1.0	0.0	0.0	0.0	0.0	0.0	0.0	1.0
BMP2K	55589	symbol	H. sapiens	55589	H. sapiens	BMP2K	BMP2 inducible kinase	GO:2000369 regulation of clathrin-dependent endocytosis;GO:0045747 positive regulation of Notch signaling pathway;GO:0030500 regulation of bone mineralization	Other	ENZYME proteins:Transferases; Predicted intracellular proteins; Kinases; Enzymes	Nuclear speckles (Supported)	Fostamatinib		(M5945)HALLMARK HEME METABOLISM	0.0	0.0	0.0	0.0	0.0	0.0	0.0	0.0	0.0	1.0	0.0	0.0	1.0	0.0	0.0	0.0	0.0	0.0	0.0	0.0
WWOX	51741	symbol	H. sapiens	51741	H. sapiens	WWOX	WW domain containing oxidoreductase	GO:2001241 positive regulation of extrinsic apoptotic signaling pathway in absence of ligand;GO:2001239 regulation of extrinsic apoptotic signaling pathway in absence of ligand;GO:2001238 positive regulation of extrinsic apoptotic signaling pathway		Disease related genes; Human disease related genes:Nervous system diseases:Neurodegenerative diseases; Predicted intracellular proteins; Human disease related genes:Nervous system diseases:Epilepsy	Golgi apparatus (Supported); Additional: Cytosol		(M13)PID ERBB4 PATHWAY; (M19)PID P73PATHWAY		0.0	0.0	0.0	0.0	0.0	0.0	0.0	0.0	1.0	0.0	0.0	0.0	0.0	0.0	0.0	0.0	0.0	0.0	0.0	0.0
ALOX5	240	symbol	H. sapiens	240	H. sapiens	ALOX5	arachidonate 5-lipoxygenase	GO:1901753 leukotriene A4 biosynthetic process;GO:1901751 leukotriene A4 metabolic process;GO:0002538 arachidonic acid metabolite production involved in inflammatory response		ENZYME proteins:Oxidoreductases; Predicted intracellular proteins; Enzymes; FDA approved drug targets:Small molecule drugs	Nucleoplasm (Supported)	Vitamin E; Masoprocol; Aminosalicylic acid; Mesalazine; Montelukast; Diethylcarbamazine; Zileuton; Sulfasalazine; Meclofenamic acid; Balsalazide; Minocycline; Hyperforin; Resveratrol; Licofelone; MLN-977; Morniflumate; Diacerein; Fostamatinib; Rhein; alpha-Tocopherol succinate; D-alpha-Tocopherol acetate			1.0	1.0	0.0	0.0	0.0	1.0	0.0	0.0	1.0	1.0	0.0	0.0	0.0	0.0	0.0	0.0	0.0	0.0	0.0	0.0
DLEU2	8847	symbol	H. sapiens	8847	H. sapiens	DLEU2	deleted in lymphocytic leukemia 2								0.0	0.0	0.0	0.0	0.0	0.0	0.0	0.0	0.0	0.0	0.0	0.0	0.0	0.0	0.0	0.0	0.0	0.0	0.0	0.0
POU2F2	5452	symbol	H. sapiens	5452	H. sapiens	POU2F2	POU class 2 homeobox 2	GO:0098586 cellular response to virus;GO:0032755 positive regulation of interleukin-6 production;GO:0032675 regulation of interleukin-6 production		Transcription factors:Helix-turn-helix domains; Predicted intracellular proteins; Cancer-related genes:Candidate cancer biomarkers; Cancer-related genes:Mutated cancer genes	Nucleoplasm;Vesicles (Enhanced)		(M236)PID DELTA NP63 PATHWAY; (M10)PID BCR 5PATHWAY		1.0	1.0	0.0	1.0	1.0	0.0	0.0	1.0	1.0	0.0	0.0	0.0	0.0	0.0	0.0	0.0	0.0	0.0	0.0	0.0
SYK	6850	symbol	H. sapiens	6850	H. sapiens	SYK	spleen associated tyrosine kinase	GO:0032752 positive regulation of interleukin-3 production;GO:0001820 serotonin secretion;GO:0002351 serotonin production involved in inflammatory response	Tyr protein kinase family	Predicted intracellular proteins; ENZYME proteins:Transferases; Cancer-related genes; Kinases:Tyr protein kinases; Enzymes; FDA approved drug targets:Small molecule drugs	Cytosol;Plasma membrane (Approved); Additional: Vesicles	Staurosporine; N-(2-hydroxy-1,1-dimethylethyl)-1-methyl-3-(1H-pyrrolo[2,3-b]pyridin-2-yl)-1H-indole-5-carboxamide; Tamatinib; 2-{2-[(3,5-dimethylphenyl)amino]pyrimidin-4-yl}-N-[(1S)-2-hydroxy-1-methylethyl]-4-methyl-1,3-thiazole-5-carboxamide; 2-{[(1R,2S)-2-aminocyclohexyl]amino}-4-[(3-methylphenyl)amino]pyrimidine-5-carboxamide; Ellagic acid; Fostamatinib	(M26)PID NFKAPPAB ATYPICAL PATHWAY; (M17200)SA B CELL RECEPTOR COMPLEXES; (M63)PID AVB3 OPN PATHWAY	(M5915)HALLMARK APICAL JUNCTION	1.0	1.0	1.0	1.0	1.0	1.0	1.0	0.0	1.0	1.0	1.0	1.0	1.0	0.0	1.0	1.0	1.0	1.0	0.0	1.0
SIPA1L1	26037	symbol	H. sapiens	26037	H. sapiens	SIPA1L1	signal induced proliferation associated 1 like 1	GO:0061001 regulation of dendritic spine morphogenesis;GO:0048013 ephrin receptor signaling pathway;GO:0048814 regulation of dendrite morphogenesis		Predicted intracellular proteins	Plasma membrane (Enhanced); Additional: Actin filaments			(M5942)HALLMARK UV RESPONSE DN	0.0	0.0	0.0	0.0	0.0	0.0	0.0	0.0	0.0	1.0	0.0	0.0	0.0	0.0	0.0	0.0	1.0	0.0	0.0	1.0
RAB30	27314	symbol	H. sapiens	27314	H. sapiens	RAB30	RAB30, member RAS oncogene family	GO:0032482 Rab protein signal transduction;GO:0007030 Golgi organization;GO:0007265 Ras protein signal transduction		Predicted intracellular proteins	Vesicles (Enhanced)				0.0	0.0	0.0	0.0	0.0	0.0	0.0	0.0	0.0	0.0	0.0	0.0	0.0	0.0	0.0	0.0	0.0	0.0	0.0	0.0
MICAL3	57553	symbol	H. sapiens	57553	H. sapiens	MICAL3	microtubule associated monooxygenase, calponin and LIM domain containing 3	GO:0030042 actin filament depolymerization;GO:0051261 protein depolymerization;GO:0008154 actin polymerization or depolymerization		ENZYME proteins:Oxidoreductases; Predicted intracellular proteins; Enzymes	Midbody ring;Nucleoplasm (Supported); Additional: Cytosol;Plasma membrane				0.0	0.0	0.0	0.0	0.0	0.0	0.0	0.0	0.0	0.0	0.0	0.0	0.0	0.0	0.0	0.0	1.0	0.0	0.0	0.0
PARP14	54625	symbol	H. sapiens	54625	H. sapiens	PARP14	poly(ADP-ribose) polymerase family member 14	GO:1902216 positive regulation of interleukin-4-mediated signaling pathway;GO:1902214 regulation of interleukin-4-mediated signaling pathway;GO:0060331 negative regulation of response to interferon-gamma		Predicted intracellular proteins	Cytosol (Supported)		(M28)PID IL4 2PATHWAY	(M5911)HALLMARK INTERFERON ALPHA RESPONSE; (M5913)HALLMARK INTERFERON GAMMA RESPONSE	0.0	0.0	0.0	0.0	0.0	0.0	1.0	0.0	0.0	0.0	0.0	0.0	0.0	0.0	1.0	0.0	0.0	1.0	0.0	0.0
SMC6	79677	symbol	H. sapiens	79677	H. sapiens	SMC6	structural maintenance of chromosomes 6	GO:0000722 telomere maintenance via recombination;GO:0006312 mitotic recombination;GO:0051984 positive regulation of chromosome segregation		Predicted intracellular proteins	Nucleoplasm (Supported)			(M5925)HALLMARK E2F TARGETS	0.0	0.0	0.0	0.0	0.0	0.0	0.0	0.0	0.0	0.0	0.0	0.0	0.0	0.0	0.0	0.0	0.0	0.0	0.0	0.0
P2RX5	5026	symbol	H. sapiens	5026	H. sapiens	P2RX5	purinergic receptor P2X 5	GO:0010524 positive regulation of calcium ion transport into cytosol;GO:0010522 regulation of calcium ion transport into cytosol;GO:0035590 purinergic nucleotide receptor signaling pathway		Predicted intracellular proteins; Transporters:Transporter channels and pores	Cytosol (Supported)				0.0	0.0	0.0	0.0	0.0	0.0	0.0	0.0	0.0	1.0	0.0	0.0	1.0	0.0	0.0	0.0	0.0	1.0	0.0	0.0
LY86	9450	symbol	H. sapiens	9450	H. sapiens	LY86	lymphocyte antigen 86	GO:0031666 positive regulation of lipopolysaccharide-mediated signaling pathway;GO:0031664 regulation of lipopolysaccharide-mediated signaling pathway;GO:0002833 positive regulation of response to biotic stimulus		Predicted secreted proteins				(M5950)HALLMARK ALLOGRAFT REJECTION	0.0	0.0	0.0	0.0	0.0	0.0	0.0	0.0	0.0	0.0	0.0	0.0	0.0	0.0	0.0	0.0	0.0	0.0	0.0	0.0
USP6NL	9712	symbol	H. sapiens	9712	H. sapiens	USP6NL	USP6 N-terminal like	GO:0035526 retrograde transport, plasma membrane to Golgi;GO:0048227 plasma membrane to endosome transport;GO:1903358 regulation of Golgi organization		Predicted intracellular proteins			(M164)PID ERBB1 DOWNSTREAM PATHWAY; (M186)PID PDGFRB PATHWAY		0.0	0.0	0.0	0.0	0.0	0.0	0.0	0.0	0.0	1.0	0.0	0.0	0.0	0.0	0.0	0.0	0.0	0.0	0.0	0.0
RPLP0	6175	symbol	H. sapiens	6175	H. sapiens	RPLP0	ribosomal protein lateral stalk subunit P0	GO:0000027 ribosomal large subunit assembly;GO:0042255 ribosome assembly;GO:0042273 ribosomal large subunit biogenesis		Ribosomal proteins; Predicted intracellular proteins	Cytosol;Endoplasmic reticulum (Supported)			(M5926)HALLMARK MYC TARGETS V1	0.0	0.0	0.0	0.0	0.0	1.0	1.0	0.0	0.0	0.0	0.0	0.0	0.0	0.0	0.0	0.0	0.0	0.0	0.0	0.0
CD69	969	symbol	H. sapiens	969	H. sapiens	CD69	CD69 molecule	GO:0071466 cellular response to xenobiotic stimulus;GO:0009410 response to xenobiotic stimulus;GO:0070887 cellular response to chemical stimulus		CD markers				(M5902)HALLMARK APOPTOSIS; (M5890)HALLMARK TNFA SIGNALING VIA NFKB; (M5913)HALLMARK INTERFERON GAMMA RESPONSE	0.0	0.0	1.0	0.0	0.0	0.0	0.0	0.0	0.0	0.0	0.0	0.0	0.0	0.0	0.0	0.0	0.0	1.0	0.0	0.0
ARID5B	84159	symbol	H. sapiens	84159	H. sapiens	ARID5B	AT-rich interaction domain 5B	GO:0060613 fat pad development;GO:0010761 fibroblast migration;GO:0030325 adrenal gland development		Cancer-related genes:Mutated cancer genes; Disease related genes; Cancer-related genes:Mutational cancer driver genes; Transcription factors:Helix-turn-helix domains; Predicted intracellular proteins	Endoplasmic reticulum (Approved); Additional: Cytosol;Nucleoplasm;Plasma membrane			(M5908)HALLMARK ANDROGEN RESPONSE; (M5913)HALLMARK INTERFERON GAMMA RESPONSE	0.0	0.0	0.0	0.0	0.0	0.0	0.0	0.0	0.0	0.0	0.0	0.0	0.0	0.0	0.0	0.0	0.0	0.0	0.0	1.0
TMEM156	80008	symbol	H. sapiens	80008	H. sapiens	TMEM156	transmembrane protein 156								0.0	0.0	0.0	0.0	0.0	0.0	0.0	0.0	0.0	0.0	0.0	0.0	0.0	0.0	0.0	0.0	0.0	0.0	0.0	0.0
SIPA1L3	23094	symbol	H. sapiens	23094	H. sapiens	SIPA1L3	signal induced proliferation associated 1 like 3	GO:0090162 establishment of epithelial cell polarity;GO:0003382 epithelial cell morphogenesis;GO:0002244 hematopoietic progenitor cell differentiation		Disease related genes; Predicted intracellular proteins; Human disease related genes:Nervous system diseases:Eye disease	Plasma membrane (Supported); Additional: Golgi apparatus;Nucleoplasm				0.0	0.0	0.0	0.0	1.0	0.0	0.0	0.0	0.0	0.0	0.0	0.0	0.0	0.0	0.0	0.0	0.0	0.0	0.0	0.0
RRAS2	22800	symbol	H. sapiens	22800	H. sapiens	RRAS2	RAS related 2	GO:0001649 osteoblast differentiation;GO:0007265 Ras protein signal transduction;GO:0007264 small GTPase mediated signal transduction		Disease related genes; RAS pathway related proteins; Predicted intracellular proteins; Human disease related genes:Congenital malformations:Other congenital malformations	Cytosol;Nucleoplasm (Approved)				0.0	0.0	0.0	0.0	0.0	0.0	0.0	0.0	1.0	1.0	0.0	0.0	0.0	0.0	0.0	0.0	0.0	0.0	0.0	0.0
SMYD3	64754	symbol	H. sapiens	64754	H. sapiens	SMYD3	SET and MYND domain containing 3	GO:0071549 cellular response to dexamethasone stimulus;GO:0014904 myotube cell development;GO:0071548 response to dexamethasone		ENZYME proteins:Transferases; Predicted intracellular proteins; Enzymes; Cancer-related genes:Candidate cancer biomarkers	Nucleoplasm (Approved); Additional: Cytosol				0.0	0.0	0.0	0.0	0.0	0.0	0.0	0.0	0.0	0.0	0.0	0.0	0.0	0.0	0.0	0.0	0.0	1.0	0.0	0.0
PHTF2	57157	symbol	H. sapiens	57157	H. sapiens	PHTF2	putative homeodomain transcription factor 2			Transcription factors:Helix-turn-helix domains	Nucleoplasm (Approved); Additional: Cytosol			(M5947)HALLMARK IL2 STAT5 SIGNALING	0.0	0.0	0.0	0.0	0.0	0.0	0.0	0.0	0.0	0.0	0.0	0.0	0.0	0.0	0.0	0.0	0.0	0.0	0.0	0.0
EEF1A1	1915	symbol	H. sapiens	1915	H. sapiens	EEF1A1	eukaryotic translation elongation factor 1 alpha 1	GO:1900022 regulation of D-erythro-sphingosine kinase activity;GO:1904714 regulation of chaperone-mediated autophagy;GO:0006414 translational elongation		Cancer-related genes:Mutational cancer driver genes; Predicted intracellular proteins	Cytosol (Supported)	Zinc; Guanosine-5'-Diphosphate; Copper; Artenimol; Zinc acetate; Zinc chloride; Zinc sulfate, unspecified form			0.0	1.0	0.0	0.0	0.0	0.0	1.0	0.0	0.0	0.0	0.0	0.0	0.0	0.0	0.0	0.0	0.0	0.0	0.0	0.0
PLAC8	51316	symbol	H. sapiens	51316	H. sapiens	PLAC8	placenta associated 8	GO:0040015 negative regulation of multicellular organism growth;GO:0050873 brown fat cell differentiation;GO:0009409 response to cold		Predicted intracellular proteins	Cytosol (Approved)			(M5891)HALLMARK HYPOXIA	1.0	0.0	0.0	0.0	0.0	0.0	0.0	0.0	0.0	0.0	0.0	0.0	0.0	0.0	0.0	0.0	0.0	0.0	0.0	0.0
ATP2B1	490	symbol	H. sapiens	490	H. sapiens	ATP2B1	ATPase plasma membrane Ca2+ transporting 1	GO:0071386 cellular response to corticosterone stimulus;GO:1990034 calcium ion export across plasma membrane;GO:0003056 regulation of vascular associated smooth muscle contraction		ENZYME proteins; Enzymes; FDA approved drug targets:Small molecule drugs; Transporters:Primary Active Transporters	Plasma membrane (Supported)	Halothane	(M195)PID CMYB PATHWAY	(M5942)HALLMARK UV RESPONSE DN; (M5890)HALLMARK TNFA SIGNALING VIA NFKB; (M5932)HALLMARK INFLAMMATORY RESPONSE	0.0	0.0	0.0	0.0	0.0	0.0	0.0	1.0	0.0	1.0	0.0	0.0	0.0	0.0	1.0	0.0	1.0	1.0	0.0	0.0
CARD11	84433	symbol	H. sapiens	84433	H. sapiens	CARD11	caspase recruitment domain family member 11	GO:0046710 GDP metabolic process;GO:0038202 TORC1 signaling;GO:0050862 positive regulation of T cell receptor signaling pathway		Cancer-related genes:Mutated cancer genes; Disease related genes; Human disease related genes:Cancers:Cancers of haematopoietic and lymphoid tissues; Human disease related genes:Immune system diseases:Primary immunodeficiency; Predicted intracellular proteins			(M88)PID CD8 TCR PATHWAY; (M10)PID BCR 5PATHWAY; (M34)PID TCR PATHWAY		1.0	1.0	0.0	1.0	1.0	0.0	0.0	0.0	0.0	1.0	1.0	0.0	0.0	0.0	0.0	1.0	0.0	1.0	1.0	0.0
JAZF1	221895	symbol	H. sapiens	221895	H. sapiens	JAZF1	JAZF zinc finger 1	GO:0000122 negative regulation of transcription by RNA polymerase II;GO:0006629 lipid metabolic process;GO:0045892 negative regulation of transcription, DNA-templated		Disease related genes; Predicted intracellular proteins; Human disease related genes:Endocrine and metabolic diseases:Diabetes	Nucleoli fibrillar center;Nucleoplasm (Supported)				0.0	0.0	0.0	0.0	0.0	0.0	0.0	0.0	0.0	0.0	0.0	0.0	0.0	0.0	0.0	0.0	0.0	0.0	0.0	0.0
EIF4G3	8672	symbol	H. sapiens	8672	H. sapiens	EIF4G3	eukaryotic translation initiation factor 4 gamma 3	GO:0006413 translational initiation;GO:0006446 regulation of translational initiation;GO:0006412 translation		Predicted intracellular proteins	Cytosol (Approved)			(M5950)HALLMARK ALLOGRAFT REJECTION	0.0	1.0	0.0	0.0	0.0	1.0	1.0	0.0	0.0	0.0	0.0	0.0	0.0	0.0	0.0	0.0	0.0	0.0	0.0	0.0
PRKCE	5581	symbol	H. sapiens	5581	H. sapiens	PRKCE	protein kinase C epsilon	GO:2001029 regulation of cellular glucuronidation;GO:2001031 positive regulation of cellular glucuronidation;GO:0035668 TRAM-dependent toll-like receptor signaling pathway	AGC Ser/Thr protein kinase family	Predicted intracellular proteins; ENZYME proteins:Transferases; Cancer-related genes:Candidate cancer biomarkers; Kinases:AGC Ser/Thr protein kinases; Enzymes; FDA approved drug targets:Small molecule drugs	Cytosol;Intermediate filaments (Supported); Additional: Plasma membrane;Vesicles	KAI-1455; Bryostatin 1; Fostamatinib	(M56)PID LPA4 PATHWAY; (M252)PID IL8 CXCR1 PATHWAY; (M269)PID RAS PATHWAY	(M5942)HALLMARK UV RESPONSE DN	1.0	1.0	0.0	0.0	1.0	0.0	0.0	0.0	1.0	1.0	0.0	1.0	1.0	1.0	0.0	1.0	1.0	1.0	0.0	0.0
IKZF3	22806	symbol	H. sapiens	22806	H. sapiens	IKZF3	IKAROS family zinc finger 3	GO:0045577 regulation of B cell differentiation;GO:0030888 regulation of B cell proliferation;GO:0007498 mesoderm development		Transcription factors:Zinc-coordinating DNA-binding domains; Predicted intracellular proteins	Nucleoplasm (Supported); Additional: Cytosol		(M122)PID IL2 1PATHWAY		1.0	1.0	0.0	1.0	1.0	0.0	0.0	0.0	0.0	0.0	1.0	0.0	1.0	0.0	0.0	1.0	0.0	0.0	0.0	0.0
BIRC3	330	symbol	H. sapiens	330	H. sapiens	BIRC3	baculoviral IAP repeat containing 3	GO:0070424 regulation of nucleotide-binding oligomerization domain containing signaling pathway;GO:0060546 negative regulation of necroptotic process;GO:0062099 negative regulation of programmed necrotic cell death		Predicted intracellular proteins; ENZYME proteins:Transferases; Disease related genes; Potential drug targets; Enzymes; Cancer-related genes:Candidate cancer biomarkers	Cytosol;Nucleoplasm (Supported)		(M7997)SA CASPASE CASCADE; (M45)PID CD40 PATHWAY; (M197)PID HIV NEF PATHWAY	(M5902)HALLMARK APOPTOSIS; (M5890)HALLMARK TNFA SIGNALING VIA NFKB; (M5953)HALLMARK KRAS SIGNALING UP	0.0	1.0	0.0	0.0	0.0	1.0	0.0	1.0	1.0	0.0	0.0	0.0	0.0	0.0	0.0	0.0	0.0	1.0	0.0	0.0
PPP1R16B	26051	symbol	H. sapiens	26051	H. sapiens	PPP1R16B	protein phosphatase 1 regulatory subunit 16B	GO:1902309 negative regulation of peptidyl-serine dephosphorylation;GO:1902308 regulation of peptidyl-serine dephosphorylation;GO:1903589 positive regulation of blood vessel endothelial cell proliferation involved in sprouting angiogenesis		Predicted intracellular proteins	Plasma membrane (Supported); Additional: Nuclear speckles				0.0	0.0	0.0	0.0	0.0	0.0	0.0	0.0	0.0	0.0	0.0	0.0	0.0	0.0	0.0	0.0	0.0	1.0	0.0	0.0
FAM117B	150864	symbol	H. sapiens	150864	H. sapiens	FAM117B	family with sequence similarity 117 member B			Predicted intracellular proteins	Nucleoplasm (Approved); Additional: Centrosome				0.0	0.0	0.0	0.0	0.0	0.0	0.0	0.0	0.0	0.0	0.0	0.0	0.0	0.0	0.0	0.0	0.0	0.0	0.0	0.0
IMMP2L	83943	symbol	H. sapiens	83943	H. sapiens	IMMP2L	inner mitochondrial membrane peptidase subunit 2	GO:0061300 cerebellum vasculature development;GO:0006627 protein processing involved in protein targeting to mitochondrion;GO:0034982 mitochondrial protein processing		Peptidases:Serine-type peptidases; Enzymes; Disease related genes; Potential drug targets; Predicted intracellular proteins	Mitochondria (Approved)				0.0	0.0	0.0	0.0	0.0	0.0	1.0	0.0	1.0	0.0	0.0	0.0	0.0	0.0	0.0	0.0	0.0	0.0	0.0	0.0
ISG20	3669	symbol	H. sapiens	3669	H. sapiens	ISG20	interferon stimulated exonuclease gene 20	GO:0000738 DNA catabolic process, exonucleolytic;GO:0006308 DNA catabolic process;GO:0090503 RNA phosphodiester bond hydrolysis, exonucleolytic		Predicted intracellular proteins; Enzymes; ENZYME proteins:Hydrolases		Uridine monophosphate		(M5911)HALLMARK INTERFERON ALPHA RESPONSE; (M5902)HALLMARK APOPTOSIS; (M5891)HALLMARK HYPOXIA	0.0	1.0	0.0	0.0	0.0	1.0	0.0	0.0	0.0	0.0	0.0	0.0	0.0	0.0	0.0	0.0	0.0	0.0	0.0	0.0
RPS12	6206	symbol	H. sapiens	6206	H. sapiens	RPS12	ribosomal protein S12	GO:0090263 positive regulation of canonical Wnt signaling pathway;GO:0002181 cytoplasmic translation;GO:0030177 positive regulation of Wnt signaling pathway		Ribosomal proteins; Predicted intracellular proteins	Cytosol (Supported); Additional: Golgi apparatus;Vesicles			(M5939)HALLMARK P53 PATHWAY	0.0	0.0	0.0	0.0	0.0	0.0	1.0	0.0	0.0	0.0	0.0	0.0	0.0	0.0	0.0	0.0	0.0	0.0	0.0	0.0
VAV3	10451	symbol	H. sapiens	10451	H. sapiens	VAV3	vav guanine nucleotide exchange factor 3	GO:0002433 immune response-regulating cell surface receptor signaling pathway involved in phagocytosis;GO:0038096 Fc-gamma receptor signaling pathway involved in phagocytosis;GO:0002431 Fc receptor mediated stimulatory signaling pathway		Predicted intracellular proteins			(M273)PID EPHA2 FWD PATHWAY; (M17200)SA B CELL RECEPTOR COMPLEXES; (M83)PID CDC42 REG PATHWAY	(M5923)HALLMARK PI3K AKT MTOR SIGNALING	1.0	1.0	0.0	1.0	1.0	0.0	1.0	0.0	1.0	1.0	0.0	1.0	0.0	0.0	0.0	1.0	1.0	0.0	0.0	0.0
AKT3	10000	symbol	H. sapiens	10000	H. sapiens	AKT3	AKT serine/threonine kinase 3	GO:1905653 positive regulation of artery morphogenesis;GO:0045793 positive regulation of cell size;GO:1905651 regulation of artery morphogenesis	AGC Ser/Thr protein kinase family	Human disease related genes:Congenital malformations:Other congenital malformations; RAS pathway related proteins; Predicted intracellular proteins; ENZYME proteins:Transferases; Disease related genes; Kinases:AGC Ser/Thr protein kinases; Potential drug targets; Enzymes; Cancer-related genes:Candidate cancer biomarkers	Cytosol (Supported)		(M12771)SA PTEN PATHWAY; (M18895)SA TRKA RECEPTOR; (M1718)SIG IL4RECEPTOR IN B LYPHOCYTES	(M5957)HALLMARK PANCREAS BETA CELLS; (M5942)HALLMARK UV RESPONSE DN; (M5915)HALLMARK APICAL JUNCTION	0.0	1.0	0.0	0.0	1.0	1.0	1.0	0.0	1.0	1.0	0.0	1.0	1.0	0.0	0.0	1.0	1.0	0.0	0.0	0.0
RPS18	6222	symbol	H. sapiens	6222	H. sapiens	RPS18	ribosomal protein S18	GO:0002181 cytoplasmic translation;GO:0006412 translation;GO:0043043 peptide biosynthetic process		Ribosomal proteins; Predicted intracellular proteins	Cytosol (Supported)	Artenimol			0.0	0.0	0.0	0.0	0.0	0.0	1.0	0.0	0.0	0.0	0.0	0.0	0.0	0.0	0.0	0.0	0.0	0.0	0.0	0.0
RPLP1	6176	symbol	H. sapiens	6176	H. sapiens	RPLP1	ribosomal protein lateral stalk subunit P1	GO:0006414 translational elongation;GO:0002181 cytoplasmic translation;GO:0032147 activation of protein kinase activity		Ribosomal proteins; Predicted intracellular proteins	Cytosol;Endoplasmic reticulum (Supported)				0.0	0.0	0.0	0.0	0.0	0.0	1.0	0.0	0.0	0.0	0.0	0.0	0.0	0.0	0.0	0.0	0.0	0.0	0.0	0.0
HLA-DOB	3112	symbol	H. sapiens	3112	H. sapiens	HLA-DOB	major histocompatibility complex, class II, DO beta	GO:0002587 negative regulation of antigen processing and presentation of peptide antigen via MHC class II;GO:0002581 negative regulation of antigen processing and presentation of peptide or polysaccharide antigen via MHC class II;GO:0002584 negative regulation of antigen processing and presentation of peptide antigen		Predicted intracellular proteins				(M5950)HALLMARK ALLOGRAFT REJECTION	0.0	1.0	0.0	0.0	1.0	0.0	0.0	0.0	0.0	0.0	0.0	0.0	0.0	0.0	1.0	0.0	0.0	0.0	0.0	0.0
MT-CO2	4513	gene_synonym	H. sapiens	4513	H. sapiens	COX2	cytochrome c oxidase subunit II	GO:0010729 positive regulation of hydrogen peroxide biosynthetic process;GO:0010726 positive regulation of hydrogen peroxide metabolic process;GO:0010728 regulation of hydrogen peroxide biosynthetic process		Disease related genes; ENZYME proteins; Transporters:Primary Active Transporters; Potential drug targets; Enzymes; Human disease related genes:Congenital disorders of metabolism:Mitochondrial diseases		Cholic Acid; N-Formylmethionine; Talmapimod	(M223)PID BETA CATENIN NUC PATHWAY		0.0	0.0	0.0	0.0	0.0	0.0	1.0	0.0	0.0	0.0	0.0	0.0	0.0	0.0	0.0	0.0	0.0	0.0	0.0	0.0
DIPK1A	388650	symbol	H. sapiens	388650	H. sapiens	DIPK1A	divergent protein kinase domain 1A			Predicted intracellular proteins	Cytosol (Approved); Additional: Nucleoplasm				0.0	0.0	0.0	0.0	0.0	0.0	0.0	0.0	0.0	0.0	0.0	0.0	0.0	0.0	0.0	0.0	0.0	0.0	0.0	0.0
CHPT1	56994	symbol	H. sapiens	56994	H. sapiens	CHPT1	choline phosphotransferase 1	GO:0006663 platelet activating factor biosynthetic process;GO:0006657 CDP-choline pathway;GO:0046469 platelet activating factor metabolic process		ENZYME proteins:Transferases; Enzymes	Vesicles (Supported)			(M5906)HALLMARK ESTROGEN RESPONSE EARLY; (M5907)HALLMARK ESTROGEN RESPONSE LATE	0.0	0.0	0.0	0.0	0.0	0.0	0.0	0.0	0.0	0.0	0.0	0.0	0.0	0.0	0.0	0.0	0.0	0.0	0.0	0.0
ADK	132	symbol	H. sapiens	132	H. sapiens	ADK	adenosine kinase	GO:0006175 dATP biosynthetic process;GO:0009216 purine deoxyribonucleoside triphosphate biosynthetic process;GO:0046060 dATP metabolic process		Predicted intracellular proteins; Human disease related genes:Congenital disorders of metabolism:Congenital disorders of amino acid metabolism; ENZYME proteins:Transferases; Disease related genes; Potential drug targets; Enzymes	Cytosol;Nucleoplasm (Supported); Additional: Plasma membrane	Adenosine phosphate; 7-(5-DEOXY-BETA-D-RIBOFURANOSYL)-5-IODO-7H-PYRROLO[2,3-D]PYRIMIDIN-4-AMINE; 5-[4-(DIMETHYLAMINO)PHENYL]-6-[(6-MORPHOLIN-4-YLPYRIDIN-3-YL)ETHYNYL]PYRIMIDIN-4-AMINE			0.0	0.0	0.0	0.0	0.0	0.0	0.0	0.0	0.0	0.0	0.0	0.0	0.0	0.0	0.0	0.0	0.0	0.0	0.0	0.0
HVCN1	84329	symbol	H. sapiens	84329	H. sapiens	HVCN1	hydrogen voltage gated channel 1	GO:0032930 positive regulation of superoxide anion generation;GO:0032928 regulation of superoxide anion generation;GO:0071294 cellular response to zinc ion		Predicted intracellular proteins; Transporters:Transporter channels and pores					0.0	0.0	0.0	0.0	0.0	0.0	0.0	0.0	0.0	0.0	0.0	0.0	0.0	0.0	0.0	0.0	0.0	1.0	0.0	0.0
EIF2AK3	9451	symbol	H. sapiens	9451	H. sapiens	EIF2AK3	eukaryotic translation initiation factor 2 alpha kinase 3	GO:0060734 regulation of endoplasmic reticulum stress-induced eIF2 alpha phosphorylation;GO:0036492 eiF2alpha phosphorylation in response to endoplasmic reticulum stress;GO:1990737 response to manganese-induced endoplasmic reticulum stress	Other	ENZYME proteins:Transferases; Kinases; Human disease related genes:Endocrine and metabolic diseases:Diabetes; Disease related genes; Potential drug targets; Enzymes				(M5922)HALLMARK UNFOLDED PROTEIN RESPONSE	0.0	1.0	0.0	1.0	0.0	0.0	1.0	0.0	1.0	1.0	0.0	0.0	1.0	1.0	0.0	0.0	0.0	0.0	0.0	1.0
ACYP2	98	symbol	H. sapiens	98	H. sapiens	ACYP2	acylphosphatase 2	GO:0006796 phosphate-containing compound metabolic process;GO:0006793 phosphorus metabolic process;GO:0044237 cellular metabolic process		Predicted intracellular proteins; Enzymes; ENZYME proteins:Hydrolases	Nucleoplasm (Approved)	Formic acid			0.0	0.0	0.0	0.0	0.0	0.0	0.0	0.0	0.0	0.0	0.0	0.0	0.0	0.0	0.0	0.0	0.0	0.0	0.0	0.0
TRAK1	22906	symbol	H. sapiens	22906	H. sapiens	TRAK1	trafficking kinesin protein 1	GO:0098957 anterograde axonal transport of mitochondrion;GO:0048311 mitochondrion distribution;GO:0019896 axonal transport of mitochondrion		Disease related genes; Predicted intracellular proteins; Human disease related genes:Nervous system diseases:Epilepsy	Endoplasmic reticulum (Approved); Additional: Nucleoplasm				0.0	0.0	0.0	0.0	0.0	0.0	1.0	0.0	0.0	0.0	0.0	0.0	0.0	0.0	0.0	0.0	0.0	0.0	0.0	0.0
ITPR1	3708	symbol	H. sapiens	3708	H. sapiens	ITPR1	inositol 1,4,5-trisphosphate receptor type 1	GO:0050882 voluntary musculoskeletal movement;GO:0042045 epithelial fluid transport;GO:0099566 regulation of postsynaptic cytosolic calcium ion concentration		Human disease related genes:Nervous system diseases:Neurodegenerative diseases; Disease related genes; Potential drug targets; Predicted intracellular proteins; Transporters:Transporter channels and pores	Vesicles (Approved)	Caffeine; 1D-myo-inositol 1,4,5-trisphosphate; Glycerin	(M1315)SIG PIP3 SIGNALING IN B LYMPHOCYTES; (M5193)SIG CHEMOTAXIS; (M8626)SIG BCR SIGNALING PATHWAY		0.0	0.0	0.0	0.0	1.0	0.0	0.0	0.0	1.0	1.0	1.0	0.0	1.0	0.0	0.0	0.0	0.0	1.0	0.0	0.0
CFL1	1072	symbol	H. sapiens	1072	H. sapiens	CFL1	cofilin 1	GO:0030043 actin filament fragmentation;GO:0030042 actin filament depolymerization;GO:0044794 positive regulation by host of viral process		Predicted intracellular proteins	Cytosol (Supported)	Dodecyldimethylamine N-oxide; Copper; Artenimol	(M5060)SA FAS SIGNALING; (M1529)SA G1 AND S PHASES; (M16801)SIG REGULATION OF THE ACTIN CYTOSKELETON BY RHO GTPASES	(M5923)HALLMARK PI3K AKT MTOR SIGNALING	0.0	0.0	0.0	0.0	0.0	1.0	1.0	0.0	1.0	1.0	0.0	1.0	0.0	1.0	0.0	0.0	1.0	0.0	0.0	0.0
PCED1B	91523	symbol	H. sapiens	91523	H. sapiens	PCED1B	PC-esterase domain containing 1B			Predicted intracellular proteins	Golgi apparatus (Approved); Additional: Vesicles				0.0	0.0	0.0	0.0	0.0	0.0	0.0	0.0	0.0	0.0	0.0	0.0	0.0	0.0	0.0	0.0	0.0	0.0	0.0	0.0
ORAI2	80228	symbol	H. sapiens	80228	H. sapiens	ORAI2	ORAI calcium release-activated calcium modulator 2	GO:0002115 store-operated calcium entry;GO:0070588 calcium ion transmembrane transport;GO:0006816 calcium ion transport		Predicted intracellular proteins	Nucleoplasm (Approved)				0.0	0.0	0.0	0.0	1.0	0.0	0.0	0.0	0.0	1.0	0.0	0.0	0.0	0.0	0.0	0.0	0.0	0.0	0.0	0.0
CASK	8573	symbol	H. sapiens	8573	H. sapiens	CASK	calcium/calmodulin dependent serine protein kinase	GO:0046710 GDP metabolic process;GO:0010839 negative regulation of keratinocyte proliferation;GO:0090280 positive regulation of calcium ion import	CAMK Ser/Thr protein kinase family	Human disease related genes:Congenital malformations:Other congenital malformations; Predicted intracellular proteins; Human disease related genes:Congenital malformations:Congenital malformations of the nervous system; Kinases:CAMK Ser/Thr protein kinases; ENZYME proteins:Transferases; Disease related genes; Potential drug targets; Enzymes	Nucleoplasm (Approved); Additional: Cytosol	Formic acid; Fostamatinib	(M251)PID SYNDECAN 3 PATHWAY; (M240)PID SYNDECAN 2 PATHWAY; (M198)PID SYNDECAN 1 PATHWAY		0.0	1.0	0.0	0.0	0.0	0.0	0.0	0.0	1.0	1.0	0.0	0.0	1.0	0.0	1.0	0.0	0.0	1.0	0.0	0.0
CAMK1D	57118	symbol	H. sapiens	57118	H. sapiens	CAMK1D	calcium/calmodulin dependent protein kinase ID	GO:0060267 positive regulation of respiratory burst;GO:0060263 regulation of respiratory burst;GO:0032793 positive regulation of CREB transcription factor activity	CAMK Ser/Thr protein kinase family	ENZYME proteins:Transferases; Enzymes; Kinases:CAMK Ser/Thr protein kinases	Cytosol;Nucleoplasm (Approved)	N-(5-METHYL-1H-PYRAZOL-3-YL)-2-PHENYLQUINAZOLIN-4-AMINE; Fostamatinib		(M5956)HALLMARK KRAS SIGNALING DN	0.0	0.0	0.0	0.0	0.0	0.0	0.0	0.0	0.0	1.0	0.0	0.0	1.0	0.0	0.0	0.0	0.0	0.0	0.0	0.0
CD82	3732	symbol	H. sapiens	3732	H. sapiens	CD82	CD82 molecule			Predicted intracellular proteins; Cancer-related genes:Candidate cancer biomarkers; CD markers	Vesicles (Approved)		(M200)PID ERA GENOMIC PATHWAY; (M145)PID P53 DOWNSTREAM PATHWAY	(M5932)HALLMARK INFLAMMATORY RESPONSE; (M5939)HALLMARK P53 PATHWAY	0.0	0.0	1.0	0.0	0.0	0.0	0.0	0.0	0.0	0.0	0.0	0.0	0.0	0.0	0.0	0.0	0.0	0.0	0.0	0.0
SP140	11262	symbol	H. sapiens	11262	H. sapiens	SP140	SP140 nuclear body protein	GO:0006952 defense response;GO:0006357 regulation of transcription by RNA polymerase II;GO:0006950 response to stress		Transcription factors:alpha-Helices exposed by beta-structures; Predicted intracellular proteins	Nucleoli fibrillar center (Approved); Additional: Mitochondria				0.0	0.0	0.0	0.0	0.0	0.0	0.0	0.0	0.0	0.0	0.0	0.0	0.0	0.0	0.0	0.0	0.0	0.0	0.0	0.0
TMEM154	201799	symbol	H. sapiens	201799	H. sapiens	TMEM154	transmembrane protein 154				Nuclear membrane (Approved); Additional: Nucleoplasm				0.0	0.0	0.0	0.0	0.0	0.0	0.0	0.0	0.0	0.0	0.0	0.0	0.0	0.0	0.0	0.0	0.0	0.0	0.0	0.0
MEF2A	4205	symbol	H. sapiens	4205	H. sapiens	MEF2A	myocyte enhancer factor 2A	GO:0070375 ERK5 cascade;GO:0055005 ventricular cardiac myofibril assembly;GO:0055015 ventricular cardiac muscle cell development		Transcription factors:alpha-Helices exposed by beta-structures; Disease related genes; Human disease related genes:Cardiovascular diseases:Vascular diseases; Cancer-related genes:Mutational cancer driver genes; Predicted intracellular proteins	Nucleoplasm (Supported)		(M229)PID P38 ALPHA BETA DOWNSTREAM PATHWAY	(M5909)HALLMARK MYOGENESIS	0.0	0.0	0.0	0.0	0.0	1.0	0.0	0.0	1.0	0.0	0.0	0.0	0.0	0.0	0.0	0.0	1.0	1.0	0.0	0.0
ARPC3	10094	symbol	H. sapiens	10094	H. sapiens	ARPC3	actin related protein 2/3 complex subunit 3	GO:0070358 actin polymerization-dependent cell motility;GO:0034314 Arp2/3 complex-mediated actin nucleation;GO:0045010 actin nucleation		Predicted intracellular proteins	Nucleoplasm (Uncertain)	N-[2-(2-methyl-1H-indol-3-yl)ethyl]thiophene-2-carboxamide; (2S)-2-(3-bromophenyl)-3-(5-chloro-2-hydroxyphenyl)-1,3-thiazolidin-4-one	(M278)PID RAC1 PATHWAY; (M81)PID CDC42 PATHWAY; (M164)PID ERBB1 DOWNSTREAM PATHWAY	(M5923)HALLMARK PI3K AKT MTOR SIGNALING	0.0	0.0	0.0	0.0	0.0	0.0	1.0	0.0	1.0	1.0	0.0	1.0	0.0	0.0	0.0	0.0	1.0	0.0	0.0	0.0
NAP1L1	4673	symbol	H. sapiens	4673	H. sapiens	NAP1L1	nucleosome assembly protein 1 like 1	GO:2000179 positive regulation of neural precursor cell proliferation;GO:2000177 regulation of neural precursor cell proliferation;GO:0006334 nucleosome assembly		Predicted intracellular proteins	Microtubules (Uncertain)			(M5925)HALLMARK E2F TARGETS; (M5926)HALLMARK MYC TARGETS V1	0.0	0.0	0.0	0.0	0.0	0.0	1.0	0.0	0.0	0.0	0.0	0.0	0.0	1.0	0.0	0.0	0.0	0.0	0.0	0.0
GSAP	54103	symbol	H. sapiens	54103	H. sapiens	GSAP	gamma-secretase activating protein	GO:1902004 positive regulation of amyloid-beta formation;GO:1902993 positive regulation of amyloid precursor protein catabolic process;GO:1902003 regulation of amyloid-beta formation		Predicted intracellular proteins	Vesicles (Approved)				0.0	0.0	0.0	0.0	0.0	0.0	0.0	0.0	0.0	0.0	0.0	0.0	0.0	0.0	0.0	0.0	0.0	0.0	0.0	0.0
RPS27	6232	symbol	H. sapiens	6232	H. sapiens	RPS27	ribosomal protein S27	GO:0000028 ribosomal small subunit assembly;GO:0042255 ribosome assembly;GO:0042274 ribosomal small subunit biogenesis		Ribosomal proteins; Disease related genes; Human disease related genes:Cardiovascular diseases:Hematologic diseases; Predicted intracellular proteins; Human disease related genes:Other congenital disorders:Ribosomopathies	Cytosol;Endoplasmic reticulum (Approved); Additional: Nucleoli				0.0	0.0	0.0	0.0	0.0	0.0	1.0	0.0	1.0	0.0	0.0	0.0	0.0	0.0	0.0	0.0	0.0	0.0	0.0	0.0
MTRNR2L12	100463498	symbol	H. sapiens	100463498	H. sapiens	MTRNR2L12	MT-RNR2 like 12 (pseudogene)	GO:1900118 negative regulation of execution phase of apoptosis;GO:1900117 regulation of execution phase of apoptosis;GO:2000272 negative regulation of signaling receptor activity		Predicted intracellular proteins; Predicted secreted proteins					0.0	0.0	0.0	0.0	0.0	0.0	0.0	0.0	0.0	0.0	0.0	0.0	0.0	0.0	0.0	0.0	0.0	0.0	0.0	0.0
SKAP1	8631	symbol	H. sapiens	8631	H. sapiens	SKAP1	src kinase associated phosphoprotein 1	GO:0033634 positive regulation of cell-cell adhesion mediated by integrin;GO:0033632 regulation of cell-cell adhesion mediated by integrin;GO:0033625 positive regulation of integrin activation		Predicted intracellular proteins	Nucleoplasm;Plasma membrane (Approved); Additional: Cytosol				1.0	1.0	0.0	0.0	0.0	0.0	0.0	0.0	1.0	1.0	1.0	0.0	0.0	0.0	0.0	1.0	1.0	0.0	0.0	0.0
OAZ1	4946	symbol	H. sapiens	4946	H. sapiens	OAZ1	ornithine decarboxylase antizyme 1	GO:1902268 negative regulation of polyamine transmembrane transport;GO:1902267 regulation of polyamine transmembrane transport;GO:0006596 polyamine biosynthetic process		Predicted intracellular proteins	Vesicles (Approved); Additional: Centriolar satellite	Ornithine	(M242)PID AURORA A PATHWAY		0.0	0.0	0.0	0.0	0.0	0.0	1.0	0.0	0.0	0.0	0.0	0.0	1.0	0.0	0.0	0.0	0.0	1.0	0.0	0.0
CSNK1G3	1456	symbol	H. sapiens	1456	H. sapiens	CSNK1G3	casein kinase 1 gamma 3	GO:0090263 positive regulation of canonical Wnt signaling pathway;GO:0030177 positive regulation of Wnt signaling pathway;GO:0018105 peptidyl-serine phosphorylation	CK1 Ser/Thr protein kinase family	ENZYME proteins:Transferases; Predicted intracellular proteins; Kinases:CK1 Ser/Thr protein kinases; Enzymes		Purvalanol A; {4-Amino-2-[(4-methoxyphenyl)amino]-1,3-thiazol-5-yl}(4-methoxyphenyl)methanone; 4-Amino-2-[(3-chlorophenyl)amino]-5-(4-fluorobenzoyl)-1,3-thiazol-3-ium; K-00546	(M219)PID HEDGEHOG GLI PATHWAY; (M136)PID FOXO PATHWAY; (M261)PID P53 REGULATION PATHWAY		1.0	0.0	0.0	0.0	0.0	0.0	0.0	0.0	0.0	0.0	0.0	0.0	1.0	0.0	0.0	0.0	0.0	0.0	0.0	0.0
RHOH	399	symbol	H. sapiens	399	H. sapiens	RHOH	ras homolog family member H	GO:0043652 engulfment of apoptotic cell;GO:0016601 Rac protein signal transduction;GO:0045576 mast cell activation		Disease related genes; Cancer-related genes; Predicted intracellular proteins; Human disease related genes:Skin diseases:Skin and soft tissue diseases	Golgi apparatus;Vesicles (Approved)			(M5947)HALLMARK IL2 STAT5 SIGNALING	1.0	1.0	0.0	0.0	1.0	0.0	0.0	0.0	1.0	0.0	1.0	0.0	0.0	0.0	0.0	1.0	1.0	1.0	0.0	0.0
TPT1	7178	symbol	H. sapiens	7178	H. sapiens	TPT1	tumor protein, translationally-controlled 1	GO:2000383 regulation of ectoderm development;GO:2000384 negative regulation of ectoderm development;GO:1902230 negative regulation of intrinsic apoptotic signaling pathway in response to DNA damage		Predicted intracellular proteins	Cytosol (Supported)	Calcium citrate; Calcium Phosphate; Calcium phosphate dihydrate	(M129)PID PLK1 PATHWAY		0.0	0.0	0.0	0.0	0.0	0.0	0.0	0.0	0.0	0.0	0.0	0.0	0.0	0.0	0.0	0.0	0.0	1.0	0.0	0.0
RPS3A	6189	symbol	H. sapiens	6189	H. sapiens	RPS3A	ribosomal protein S3A	GO:0006413 translational initiation;GO:0002181 cytoplasmic translation;GO:0006412 translation		Ribosomal proteins; Predicted intracellular proteins	Cytosol;Endoplasmic reticulum;Nucleoli (Enhanced)			(M5950)HALLMARK ALLOGRAFT REJECTION	0.0	0.0	0.0	0.0	0.0	0.0	1.0	0.0	0.0	0.0	0.0	0.0	0.0	0.0	0.0	0.0	0.0	0.0	0.0	0.0
RPS4X	6191	symbol	H. sapiens	6191	H. sapiens	RPS4X	ribosomal protein S4 X-linked	GO:0002181 cytoplasmic translation;GO:0045727 positive regulation of translation;GO:0034250 positive regulation of cellular amide metabolic process		Ribosomal proteins; Predicted intracellular proteins			(M16801)SIG REGULATION OF THE ACTIN CYTOSKELETON BY RHO GTPASES; (M5193)SIG CHEMOTAXIS		0.0	0.0	0.0	0.0	0.0	0.0	1.0	0.0	0.0	0.0	0.0	0.0	0.0	0.0	0.0	0.0	0.0	0.0	0.0	0.0
FCMR	9214	symbol	H. sapiens	9214	H. sapiens	FCMR	Fc mu receptor	GO:0006968 cellular defense response;GO:0043066 negative regulation of apoptotic process;GO:0043069 negative regulation of programmed cell death		Predicted intracellular proteins; Predicted secreted proteins	Cytosol;Focal adhesion sites (Approved); Additional: Nucleoplasm			(M5906)HALLMARK ESTROGEN RESPONSE EARLY	0.0	0.0	0.0	0.0	0.0	0.0	0.0	0.0	0.0	0.0	0.0	0.0	0.0	0.0	0.0	0.0	0.0	0.0	0.0	0.0
CHD9	80205	symbol	H. sapiens	80205	H. sapiens	CHD9	chromodomain helicase DNA binding protein 9	GO:0032508 DNA duplex unwinding;GO:0032392 DNA geometric change;GO:0071103 DNA conformation change		Predicted intracellular proteins; Enzymes; ENZYME proteins:Hydrolases	Nucleoplasm (Supported); Additional: Cytosol				0.0	0.0	0.0	0.0	0.0	0.0	1.0	0.0	0.0	0.0	0.0	0.0	0.0	0.0	0.0	0.0	0.0	0.0	0.0	0.0
PTPN6	5777	symbol	H. sapiens	5777	H. sapiens	PTPN6	protein tyrosine phosphatase non-receptor type 6	GO:0033277 abortive mitotic cell cycle;GO:1905867 epididymis development;GO:0033007 negative regulation of mast cell activation involved in immune response		Predicted intracellular proteins; Enzymes; ENZYME proteins:Hydrolases	Nucleoplasm (Supported); Additional: Nucleoli	Tiludronic acid	(M233)PID EPO PATHWAY; (M127)PID ERBB1 RECEPTOR PROXIMAL PATHWAY; (M142)PID AJDISS 2PATHWAY	(M5907)HALLMARK ESTROGEN RESPONSE LATE; (M5913)HALLMARK INTERFERON GAMMA RESPONSE; (M5950)HALLMARK ALLOGRAFT REJECTION	1.0	1.0	0.0	1.0	1.0	1.0	1.0	0.0	1.0	1.0	1.0	0.0	1.0	1.0	1.0	1.0	0.0	1.0	0.0	0.0
VOPP1	81552	symbol	H. sapiens	81552	H. sapiens	VOPP1	VOPP1 WW domain binding protein			Predicted intracellular proteins					0.0	0.0	0.0	0.0	0.0	0.0	0.0	0.0	0.0	0.0	0.0	0.0	0.0	0.0	0.0	0.0	0.0	0.0	0.0	0.0
RPS23	6228	symbol	H. sapiens	6228	H. sapiens	RPS23	ribosomal protein S23	GO:1990145 maintenance of translational fidelity;GO:0034063 stress granule assembly;GO:0002181 cytoplasmic translation		Disease related genes; Ribosomal proteins; Predicted intracellular proteins	Cytosol;Endoplasmic reticulum (Enhanced)				0.0	0.0	0.0	0.0	0.0	0.0	1.0	0.0	0.0	0.0	0.0	0.0	0.0	0.0	0.0	0.0	0.0	0.0	0.0	0.0
LRMP	4033	gene_synonym	H. sapiens	4033	H. sapiens	IRAG2	inositol 1,4,5-triphosphate receptor associated 2	GO:0006903 vesicle targeting;GO:0006906 vesicle fusion;GO:0090174 organelle membrane fusion		Predicted intracellular proteins; Transporters:Accessory Factors Involved in Transport	Endoplasmic reticulum;Plasma membrane (Approved)			(M5939)HALLMARK P53 PATHWAY	0.0	0.0	0.0	0.0	0.0	0.0	0.0	0.0	0.0	0.0	0.0	0.0	0.0	0.0	0.0	0.0	0.0	0.0	0.0	0.0
IL4R	3566	symbol	H. sapiens	3566	H. sapiens	IL4R	interleukin 4 receptor	GO:0045626 negative regulation of T-helper 1 cell differentiation;GO:0035771 interleukin-4-mediated signaling pathway;GO:1990834 response to odorant		Predicted intracellular proteins; Human disease related genes:Immune system diseases:Allergies and autoimmune diseases; Transporters:Accessory Factors Involved in Transport; Predicted secreted proteins; CD markers; Human disease related genes:Skin diseases:Skin and soft tissue diseases; Cancer-related genes:Candidate cancer biomarkers; FDA approved drug targets:Biotech drugs	Nucleoplasm;Plasma membrane (Approved); Additional: Centriolar satellite	AER001; Dupilumab	(M1718)SIG IL4RECEPTOR IN B LYPHOCYTES; (M28)PID IL4 2PATHWAY; (M19)PID P73PATHWAY	(M5897)HALLMARK IL6 JAK STAT3 SIGNALING; (M5911)HALLMARK INTERFERON ALPHA RESPONSE; (M5947)HALLMARK IL2 STAT5 SIGNALING	1.0	1.0	0.0	1.0	0.0	1.0	0.0	0.0	0.0	1.0	1.0	0.0	1.0	0.0	1.0	0.0	0.0	0.0	0.0	0.0
RPS8	6202	symbol	H. sapiens	6202	H. sapiens	RPS8	ribosomal protein S8	GO:0000462 maturation of SSU-rRNA from tricistronic rRNA transcript (SSU-rRNA, 5.8S rRNA, LSU-rRNA);GO:0030490 maturation of SSU-rRNA;GO:0042274 ribosomal small subunit biogenesis		Ribosomal proteins; Predicted intracellular proteins	Cytosol;Endoplasmic reticulum (Enhanced)	Artenimol			0.0	0.0	0.0	0.0	0.0	0.0	1.0	0.0	0.0	0.0	0.0	0.0	0.0	0.0	0.0	0.0	0.0	0.0	0.0	0.0
UVRAG	7405	symbol	H. sapiens	7405	H. sapiens	UVRAG	UV radiation resistance associated	GO:0051684 maintenance of Golgi location;GO:1901098 positive regulation of autophagosome maturation;GO:0097680 double-strand break repair via classical nonhomologous end joining		Disease related genes; Predicted intracellular proteins					0.0	0.0	0.0	0.0	0.0	0.0	1.0	0.0	0.0	0.0	0.0	0.0	1.0	0.0	0.0	0.0	0.0	0.0	0.0	0.0
RPL10	6134	symbol	H. sapiens	6134	H. sapiens	RPL10	ribosomal protein L10	GO:1990403 embryonic brain development;GO:0000027 ribosomal large subunit assembly;GO:0042255 ribosome assembly		Cancer-related genes; Ribosomal proteins; Disease related genes; Predicted intracellular proteins; Human disease related genes:Other diseases:Mental and behavioural disorders	Cytosol;Endoplasmic reticulum (Enhanced)	Artenimol			0.0	0.0	0.0	0.0	0.0	0.0	1.0	0.0	0.0	0.0	0.0	0.0	0.0	0.0	0.0	0.0	0.0	0.0	0.0	0.0
ARHGAP17	55114	symbol	H. sapiens	55114	H. sapiens	ARHGAP17	Rho GTPase activating protein 17	GO:0035020 regulation of Rac protein signal transduction;GO:0017156 calcium-ion regulated exocytosis;GO:0045055 regulated exocytosis		Predicted intracellular proteins	Cytosol;Plasma membrane (Supported)		(M83)PID CDC42 REG PATHWAY; (M241)PID RAC1 REG PATHWAY		0.0	0.0	0.0	0.0	0.0	0.0	0.0	0.0	0.0	0.0	0.0	0.0	0.0	0.0	0.0	0.0	1.0	0.0	0.0	0.0
TANK	10010	symbol	H. sapiens	10010	H. sapiens	TANK	TRAF family member associated NFKB activator	GO:2000158 positive regulation of ubiquitin-specific protease activity;GO:2000152 regulation of ubiquitin-specific protease activity;GO:1903003 positive regulation of protein deubiquitination		Predicted intracellular proteins	Cytosol (Supported); Additional: Nucleoli			(M5890)HALLMARK TNFA SIGNALING VIA NFKB; (M5905)HALLMARK ADIPOGENESIS	0.0	0.0	0.0	0.0	0.0	0.0	0.0	0.0	1.0	0.0	0.0	0.0	0.0	0.0	0.0	0.0	0.0	1.0	0.0	0.0
STX7	8417	symbol	H. sapiens	8417	H. sapiens	STX7	syntaxin 7	GO:1902685 positive regulation of receptor localization to synapse;GO:1902683 regulation of receptor localization to synapse;GO:0001916 positive regulation of T cell mediated cytotoxicity		Predicted intracellular proteins	Lysosomes (Supported)			(M5910)HALLMARK PROTEIN SECRETION	1.0	1.0	0.0	0.0	0.0	0.0	0.0	0.0	0.0	0.0	1.0	0.0	1.0	0.0	0.0	0.0	0.0	0.0	0.0	0.0
RPL13A	23521	symbol	H. sapiens	23521	H. sapiens	RPL13A	ribosomal protein L13a	GO:1901193 regulation of formation of translation preinitiation complex;GO:1901194 negative regulation of formation of translation preinitiation complex;GO:1904689 negative regulation of cytoplasmic translational initiation		Ribosomal proteins; Predicted intracellular proteins	Cytosol;Nucleoli (Approved)	(S)-3-phenyllactic acid; Anisomycin; Puromycin	(M5493)WNT SIGNALING		0.0	0.0	0.0	0.0	0.0	0.0	1.0	0.0	0.0	0.0	0.0	0.0	0.0	1.0	0.0	0.0	1.0	0.0	0.0	0.0

## Sheet: Enrichment
GroupID	Category	Term	Description	LogP	Log(q-value)	InTerm_InList	Genes	Symbols
1_Summary	GO Biological Processes	GO:0002429	immune response-activating cell surface receptor signaling pathway	-21.4301	-17.4137	25/259	596,640,931,973,974,1378,3115,3119,3123,3495,3507,3514,3537,3538,4067,4208,5144,5581,5747,5777,6850,8631,10451,29760,55024,972,2208,3109,3122,3566,8417,26228,84433,118788,240,5079,5452,9308,399,1130,3394,2823,22806,51316,57162,71,157,1456,4643,9873,115123	BCL2,BLK,MS4A1,CD79A,CD79B,CR1,HLA-DPB1,HLA-DQB1,HLA-DRB1,IGHD,IGHM,IGKC,IGLC1,IGLC2,LYN,MEF2C,PDE4D,PRKCE,PTK2,PTPN6,SYK,SKAP1,VAV3,BLNK,BANK1,CD74,FCER2,HLA-DMB,HLA-DRA,IL4R,STX7,STAP1,CARD11,PIK3AP1,ALOX5,PAX5,POU2F2,CD83,RHOH,LYST,IRF8,GPM6A,IKZF3,PLAC8,PELI1,ACTG1,GRK3,CSNK1G3,MYO1E,FCHSD2,MARCHF3
1_Member	GO Biological Processes	GO:0002429	immune response-activating cell surface receptor signaling pathway	-21.4301	-17.4137	25/259	596,640,931,973,974,1378,3115,3119,3123,3495,3507,3514,3537,3538,4067,4208,5144,5581,5747,5777,6850,8631,10451,29760,55024	BCL2,BLK,MS4A1,CD79A,CD79B,CR1,HLA-DPB1,HLA-DQB1,HLA-DRB1,IGHD,IGHM,IGKC,IGLC1,IGLC2,LYN,MEF2C,PDE4D,PRKCE,PTK2,PTPN6,SYK,SKAP1,VAV3,BLNK,BANK1
1_Member	GO Biological Processes	GO:0002757	immune response-activating signal transduction	-21.4301	-17.4137	25/259	596,640,931,973,974,1378,3115,3119,3123,3495,3507,3514,3537,3538,4067,4208,5144,5581,5747,5777,6850,8631,10451,29760,55024	BCL2,BLK,MS4A1,CD79A,CD79B,CR1,HLA-DPB1,HLA-DQB1,HLA-DRB1,IGHD,IGHM,IGKC,IGLC1,IGLC2,LYN,MEF2C,PDE4D,PRKCE,PTK2,PTPN6,SYK,SKAP1,VAV3,BLNK,BANK1
1_Member	GO Biological Processes	GO:0050778	positive regulation of immune response	-21.2846	-17.4137	33/567	596,640,931,972,973,974,1378,2208,3109,3115,3119,3122,3123,3495,3507,3514,3537,3538,3566,4067,4208,5144,5581,5747,5777,6850,8417,8631,10451,26228,29760,55024,84433	BCL2,BLK,MS4A1,CD74,CD79A,CD79B,CR1,FCER2,HLA-DMB,HLA-DPB1,HLA-DQB1,HLA-DRA,HLA-DRB1,IGHD,IGHM,IGKC,IGLC1,IGLC2,IL4R,LYN,MEF2C,PDE4D,PRKCE,PTK2,PTPN6,SYK,STX7,SKAP1,VAV3,STAP1,BLNK,BANK1,CARD11
1_Member	GO Biological Processes	GO:0002768	immune response-regulating cell surface receptor signaling pathway	-20.2553	-16.6854	25/289	596,640,931,973,974,1378,3115,3119,3123,3495,3507,3514,3537,3538,4067,4208,5144,5581,5747,5777,6850,8631,10451,29760,55024	BCL2,BLK,MS4A1,CD79A,CD79B,CR1,HLA-DPB1,HLA-DQB1,HLA-DRB1,IGHD,IGHM,IGKC,IGLC1,IGLC2,LYN,MEF2C,PDE4D,PRKCE,PTK2,PTPN6,SYK,SKAP1,VAV3,BLNK,BANK1
1_Member	GO Biological Processes	GO:0050851	antigen receptor-mediated signaling pathway	-19.991	-16.546	22/203	596,640,931,973,974,3115,3119,3123,3495,3507,3514,3537,3538,4067,4208,5144,5777,6850,8631,10451,29760,55024	BCL2,BLK,MS4A1,CD79A,CD79B,HLA-DPB1,HLA-DQB1,HLA-DRB1,IGHD,IGHM,IGKC,IGLC1,IGLC2,LYN,MEF2C,PDE4D,PTPN6,SYK,SKAP1,VAV3,BLNK,BANK1
1_Member	GO Biological Processes	GO:0002253	activation of immune response	-18.7891	-15.485	25/332	596,640,931,973,974,1378,3115,3119,3123,3495,3507,3514,3537,3538,4067,4208,5144,5581,5747,5777,6850,8631,10451,29760,55024	BCL2,BLK,MS4A1,CD79A,CD79B,CR1,HLA-DPB1,HLA-DQB1,HLA-DRB1,IGHD,IGHM,IGKC,IGLC1,IGLC2,LYN,MEF2C,PDE4D,PRKCE,PTK2,PTPN6,SYK,SKAP1,VAV3,BLNK,BANK1
1_Member	GO Biological Processes	GO:0002764	immune response-regulating signaling pathway	-18.7539	-15.485	26/371	596,640,931,973,974,1378,3115,3119,3123,3495,3507,3514,3537,3538,4067,4208,5144,5581,5747,5777,6850,8631,10451,29760,55024,118788	BCL2,BLK,MS4A1,CD79A,CD79B,CR1,HLA-DPB1,HLA-DQB1,HLA-DRB1,IGHD,IGHM,IGKC,IGLC1,IGLC2,LYN,MEF2C,PDE4D,PRKCE,PTK2,PTPN6,SYK,SKAP1,VAV3,BLNK,BANK1,PIK3AP1
1_Member	GO Biological Processes	GO:0050853	B cell receptor signaling pathway	-18.0775	-14.9847	17/112	596,640,931,973,974,3495,3507,3514,3537,3538,4067,4208,5777,6850,10451,29760,55024	BCL2,BLK,MS4A1,CD79A,CD79B,IGHD,IGHM,IGKC,IGLC1,IGLC2,LYN,MEF2C,PTPN6,SYK,VAV3,BLNK,BANK1
1_Member	GO Biological Processes	GO:0006959	humoral immune response	-10.0956	-7.72068	16/291	240,596,931,1378,3119,3123,3495,3507,3514,3537,3538,4208,5079,5452,9308,29760	ALOX5,BCL2,MS4A1,CR1,HLA-DQB1,HLA-DRB1,IGHD,IGHM,IGKC,IGLC1,IGLC2,MEF2C,PAX5,POU2F2,CD83,BLNK
1_Member	GO Biological Processes	GO:0006909	phagocytosis	-8.35349	-6.08096	13/234	399,1130,3394,3495,3507,3514,3537,3538,4067,5581,5747,6850,10451	RHOH,LYST,IRF8,IGHD,IGHM,IGKC,IGLC1,IGLC2,LYN,PRKCE,PTK2,SYK,VAV3
1_Member	GO Biological Processes	GO:0009617	response to bacterium	-6.52627	-4.39568	19/732	931,1130,2823,3123,3394,3495,3507,3514,3537,3538,4067,4208,5581,6850,22806,26228,51316,55024,57162	MS4A1,LYST,GPM6A,HLA-DRB1,IRF8,IGHD,IGHM,IGKC,IGLC1,IGLC2,LYN,MEF2C,PRKCE,SYK,IKZF3,STAP1,PLAC8,BANK1,PELI1
1_Member	GO Biological Processes	GO:0006897	endocytosis	-4.65015	-2.65618	13/498	71,157,399,1456,3495,3507,3514,3537,3538,4643,6850,9873,115123	ACTG1,GRK3,RHOH,CSNK1G3,IGHD,IGHM,IGKC,IGLC1,IGLC2,MYO1E,SYK,FCHSD2,MARCHF3
1_Member	GO Biological Processes	GO:0006958	complement activation, classical pathway	-4.1862	-2.23953	6/106	1378,3495,3507,3514,3537,3538	CR1,IGHD,IGHM,IGKC,IGLC1,IGLC2
1_Member	GO Biological Processes	GO:0002455	humoral immune response mediated by circulating immunoglobulin	-4.09658	-2.16348	6/110	1378,3495,3507,3514,3537,3538	CR1,IGHD,IGHM,IGKC,IGLC1,IGLC2
1_Member	GO Biological Processes	GO:0006911	phagocytosis, engulfment	-4.01056	-2.08738	6/114	399,3495,3507,3514,3537,3538	RHOH,IGHD,IGHM,IGKC,IGLC1,IGLC2
1_Member	GO Biological Processes	GO:0006956	complement activation	-3.84837	-1.93327	6/122	1378,3495,3507,3514,3537,3538	CR1,IGHD,IGHM,IGKC,IGLC1,IGLC2
1_Member	GO Biological Processes	GO:0099024	plasma membrane invagination	-3.82895	-1.91545	6/123	399,3495,3507,3514,3537,3538	RHOH,IGHD,IGHM,IGKC,IGLC1,IGLC2
1_Member	GO Biological Processes	GO:0010324	membrane invagination	-3.69788	-1.8107	6/130	399,3495,3507,3514,3537,3538	RHOH,IGHD,IGHM,IGKC,IGLC1,IGLC2
1_Member	GO Biological Processes	GO:0006910	phagocytosis, recognition	-3.55497	-1.69823	5/89	3495,3507,3514,3537,3538	IGHD,IGHM,IGKC,IGLC1,IGLC2
1_Member	GO Biological Processes	GO:0042742	defense response to bacterium	-3.32463	-1.50804	9/351	1130,3394,3495,3507,3514,3537,3538,6850,51316	LYST,IRF8,IGHD,IGHM,IGKC,IGLC1,IGLC2,SYK,PLAC8
2_Summary	GO Biological Processes	GO:0051249	regulation of lymphocyte activation	-20.4644	-16.7926	32/557	399,596,640,933,972,1378,3108,3109,3112,3113,3115,3117,3119,3122,3123,3127,3495,3507,3514,3537,3538,3566,4067,4208,5777,6850,9308,10451,22806,55024,57162,84433,26228,55016,1130,3394,5581,5747,23075,60468,240,8631,1915,653361,8728,931,2208,71,8573,330,4261,10000,817,8672,57705,973,974,29760,8417,4050,29802,3669,8364,5452,9451	RHOH,BCL2,BLK,CD22,CD74,CR1,HLA-DMA,HLA-DMB,HLA-DOB,HLA-DPA1,HLA-DPB1,HLA-DQA1,HLA-DQB1,HLA-DRA,HLA-DRB1,HLA-DRB5,IGHD,IGHM,IGKC,IGLC1,IGLC2,IL4R,LYN,MEF2C,PTPN6,SYK,CD83,VAV3,IKZF3,BANK1,PELI1,CARD11,STAP1,MARCHF1,LYST,IRF8,PRKCE,PTK2,SWAP70,BACH2,ALOX5,SKAP1,EEF1A1,NCF1,ADAM19,MS4A1,FCER2,ACTG1,CASK,BIRC3,CIITA,AKT3,CAMK2D,EIF4G3,WDFY4,CD79A,CD79B,BLNK,STX7,LTB,VPREB3,ISG20,H4C3,POU2F2,EIF2AK3
2_Member	GO Biological Processes	GO:0051249	regulation of lymphocyte activation	-20.4644	-16.7926	32/557	399,596,640,933,972,1378,3108,3109,3112,3113,3115,3117,3119,3122,3123,3127,3495,3507,3514,3537,3538,3566,4067,4208,5777,6850,9308,10451,22806,55024,57162,84433	RHOH,BCL2,BLK,CD22,CD74,CR1,HLA-DMA,HLA-DMB,HLA-DOB,HLA-DPA1,HLA-DPB1,HLA-DQA1,HLA-DQB1,HLA-DRA,HLA-DRB1,HLA-DRB5,IGHD,IGHM,IGKC,IGLC1,IGLC2,IL4R,LYN,MEF2C,PTPN6,SYK,CD83,VAV3,IKZF3,BANK1,PELI1,CARD11
2_Member	GO Biological Processes	GO:0051251	positive regulation of lymphocyte activation	-20.4417	-16.7926	28/391	399,596,972,1378,3108,3109,3112,3113,3115,3117,3119,3122,3123,3127,3495,3507,3514,3537,3538,3566,4067,4208,5777,6850,9308,10451,57162,84433	RHOH,BCL2,CD74,CR1,HLA-DMA,HLA-DMB,HLA-DOB,HLA-DPA1,HLA-DPB1,HLA-DQA1,HLA-DQB1,HLA-DRA,HLA-DRB1,HLA-DRB5,IGHD,IGHM,IGKC,IGLC1,IGLC2,IL4R,LYN,MEF2C,PTPN6,SYK,CD83,VAV3,PELI1,CARD11
2_Member	GO Biological Processes	GO:0002696	positive regulation of leukocyte activation	-20.1444	-16.6414	29/441	399,596,972,1378,3108,3109,3112,3113,3115,3117,3119,3122,3123,3127,3495,3507,3514,3537,3538,3566,4067,4208,5777,6850,9308,10451,26228,57162,84433	RHOH,BCL2,CD74,CR1,HLA-DMA,HLA-DMB,HLA-DOB,HLA-DPA1,HLA-DPB1,HLA-DQA1,HLA-DQB1,HLA-DRA,HLA-DRB1,HLA-DRB5,IGHD,IGHM,IGKC,IGLC1,IGLC2,IL4R,LYN,MEF2C,PTPN6,SYK,CD83,VAV3,STAP1,PELI1,CARD11
2_Member	GO Biological Processes	GO:0050867	positive regulation of cell activation	-19.6921	-16.2982	29/458	399,596,972,1378,3108,3109,3112,3113,3115,3117,3119,3122,3123,3127,3495,3507,3514,3537,3538,3566,4067,4208,5777,6850,9308,10451,26228,57162,84433	RHOH,BCL2,CD74,CR1,HLA-DMA,HLA-DMB,HLA-DOB,HLA-DPA1,HLA-DPB1,HLA-DQA1,HLA-DQB1,HLA-DRA,HLA-DRB1,HLA-DRB5,IGHD,IGHM,IGKC,IGLC1,IGLC2,IL4R,LYN,MEF2C,PTPN6,SYK,CD83,VAV3,STAP1,PELI1,CARD11
2_Member	GO Biological Processes	GO:0002694	regulation of leukocyte activation	-19.3824	-16.0343	33/654	399,596,640,933,972,1378,3108,3109,3112,3113,3115,3117,3119,3122,3123,3127,3495,3507,3514,3537,3538,3566,4067,4208,5777,6850,9308,10451,22806,26228,55024,57162,84433	RHOH,BCL2,BLK,CD22,CD74,CR1,HLA-DMA,HLA-DMB,HLA-DOB,HLA-DPA1,HLA-DPB1,HLA-DQA1,HLA-DQB1,HLA-DRA,HLA-DRB1,HLA-DRB5,IGHD,IGHM,IGKC,IGLC1,IGLC2,IL4R,LYN,MEF2C,PTPN6,SYK,CD83,VAV3,IKZF3,STAP1,BANK1,PELI1,CARD11
2_Member	GO Biological Processes	GO:0050865	regulation of cell activation	-18.3233	-15.0892	33/709	399,596,640,933,972,1378,3108,3109,3112,3113,3115,3117,3119,3122,3123,3127,3495,3507,3514,3537,3538,3566,4067,4208,5777,6850,9308,10451,22806,26228,55024,57162,84433	RHOH,BCL2,BLK,CD22,CD74,CR1,HLA-DMA,HLA-DMB,HLA-DOB,HLA-DPA1,HLA-DPB1,HLA-DQA1,HLA-DQB1,HLA-DRA,HLA-DRB1,HLA-DRB5,IGHD,IGHM,IGKC,IGLC1,IGLC2,IL4R,LYN,MEF2C,PTPN6,SYK,CD83,VAV3,IKZF3,STAP1,BANK1,PELI1,CARD11
2_Member	GO Biological Processes	GO:0002495	antigen processing and presentation of peptide antigen via MHC class II	-18.1507	-15.0169	12/32	972,3108,3109,3112,3113,3115,3117,3119,3122,3123,3127,55016	CD74,HLA-DMA,HLA-DMB,HLA-DOB,HLA-DPA1,HLA-DPB1,HLA-DQA1,HLA-DQB1,HLA-DRA,HLA-DRB1,HLA-DRB5,MARCHF1
2_Member	GO Biological Processes	GO:0002252	immune effector process	-18.142	-15.0169	27/434	972,1130,1378,3108,3109,3112,3113,3115,3117,3119,3122,3123,3127,3394,3495,3507,3514,3537,3538,3566,4067,5581,5747,5777,6850,10451,23075	CD74,LYST,CR1,HLA-DMA,HLA-DMB,HLA-DOB,HLA-DPA1,HLA-DPB1,HLA-DQA1,HLA-DQB1,HLA-DRA,HLA-DRB1,HLA-DRB5,IRF8,IGHD,IGHM,IGKC,IGLC1,IGLC2,IL4R,LYN,PRKCE,PTK2,PTPN6,SYK,VAV3,SWAP70
2_Member	GO Biological Processes	GO:0002399	MHC class II protein complex assembly	-18.1345	-15.0169	10/16	3108,3109,3112,3113,3115,3117,3119,3122,3123,3127	HLA-DMA,HLA-DMB,HLA-DOB,HLA-DPA1,HLA-DPB1,HLA-DQA1,HLA-DQB1,HLA-DRA,HLA-DRB1,HLA-DRB5
2_Member	GO Biological Processes	GO:0002503	peptide antigen assembly with MHC class II protein complex	-18.1345	-15.0169	10/16	3108,3109,3112,3113,3115,3117,3119,3122,3123,3127	HLA-DMA,HLA-DMB,HLA-DOB,HLA-DPA1,HLA-DPB1,HLA-DQA1,HLA-DQB1,HLA-DRA,HLA-DRB1,HLA-DRB5
2_Member	GO Biological Processes	GO:0002504	antigen processing and presentation of peptide or polysaccharide antigen via MHC class II	-17.9568	-14.8875	12/33	972,3108,3109,3112,3113,3115,3117,3119,3122,3123,3127,55016	CD74,HLA-DMA,HLA-DMB,HLA-DOB,HLA-DPA1,HLA-DPB1,HLA-DQA1,HLA-DQB1,HLA-DRA,HLA-DRB1,HLA-DRB5,MARCHF1
2_Member	GO Biological Processes	GO:0002449	lymphocyte mediated immunity	-17.5013	-14.4543	21/231	972,1130,1378,3108,3109,3112,3113,3115,3117,3119,3122,3123,3127,3495,3507,3514,3537,3538,3566,5777,23075	CD74,LYST,CR1,HLA-DMA,HLA-DMB,HLA-DOB,HLA-DPA1,HLA-DPB1,HLA-DQA1,HLA-DQB1,HLA-DRA,HLA-DRB1,HLA-DRB5,IGHD,IGHM,IGKC,IGLC1,IGLC2,IL4R,PTPN6,SWAP70
2_Member	GO Biological Processes	GO:0016064	immunoglobulin mediated immune response	-17.4221	-14.3962	19/173	972,1378,3108,3109,3112,3113,3115,3117,3119,3122,3123,3127,3495,3507,3514,3537,3538,3566,23075	CD74,CR1,HLA-DMA,HLA-DMB,HLA-DOB,HLA-DPA1,HLA-DPB1,HLA-DQA1,HLA-DQB1,HLA-DRA,HLA-DRB1,HLA-DRB5,IGHD,IGHM,IGKC,IGLC1,IGLC2,IL4R,SWAP70
2_Member	GO Biological Processes	GO:0019724	B cell mediated immunity	-17.2327	-14.227	19/177	972,1378,3108,3109,3112,3113,3115,3117,3119,3122,3123,3127,3495,3507,3514,3537,3538,3566,23075	CD74,CR1,HLA-DMA,HLA-DMB,HLA-DOB,HLA-DPA1,HLA-DPB1,HLA-DQA1,HLA-DQB1,HLA-DRA,HLA-DRB1,HLA-DRB5,IGHD,IGHM,IGKC,IGLC1,IGLC2,IL4R,SWAP70
2_Member	GO Biological Processes	GO:0002460	adaptive immune response based on somatic recombination of immune receptors built from immunoglobulin superfamily domains	-17.1585	-14.1722	21/240	972,1378,3108,3109,3112,3113,3115,3117,3119,3122,3123,3127,3495,3507,3514,3537,3538,3566,4208,23075,60468	CD74,CR1,HLA-DMA,HLA-DMB,HLA-DOB,HLA-DPA1,HLA-DPB1,HLA-DQA1,HLA-DQB1,HLA-DRA,HLA-DRB1,HLA-DRB5,IGHD,IGHM,IGKC,IGLC1,IGLC2,IL4R,MEF2C,SWAP70,BACH2
2_Member	GO Biological Processes	GO:0002443	leukocyte mediated immunity	-17.0907	-14.1228	22/276	972,1130,1378,3108,3109,3112,3113,3115,3117,3119,3122,3123,3127,3495,3507,3514,3537,3538,3566,4067,5777,23075	CD74,LYST,CR1,HLA-DMA,HLA-DMB,HLA-DOB,HLA-DPA1,HLA-DPB1,HLA-DQA1,HLA-DQB1,HLA-DRA,HLA-DRB1,HLA-DRB5,IGHD,IGHM,IGKC,IGLC1,IGLC2,IL4R,LYN,PTPN6,SWAP70
2_Member	GO Biological Processes	GO:0002396	MHC protein complex assembly	-16.7811	-13.848	10/20	3108,3109,3112,3113,3115,3117,3119,3122,3123,3127	HLA-DMA,HLA-DMB,HLA-DOB,HLA-DPA1,HLA-DPB1,HLA-DQA1,HLA-DQB1,HLA-DRA,HLA-DRB1,HLA-DRB5
2_Member	GO Biological Processes	GO:0002501	peptide antigen assembly with MHC protein complex	-16.7811	-13.848	10/20	3108,3109,3112,3113,3115,3117,3119,3122,3123,3127	HLA-DMA,HLA-DMB,HLA-DOB,HLA-DPA1,HLA-DPB1,HLA-DQA1,HLA-DQB1,HLA-DRA,HLA-DRB1,HLA-DRB5
2_Member	GO Biological Processes	GO:0019886	antigen processing and presentation of exogenous peptide antigen via MHC class II	-16.5471	-13.6304	11/30	972,3108,3109,3112,3113,3115,3117,3119,3122,3123,3127	CD74,HLA-DMA,HLA-DMB,HLA-DOB,HLA-DPA1,HLA-DPB1,HLA-DQA1,HLA-DQB1,HLA-DRA,HLA-DRB1,HLA-DRB5
2_Member	GO Biological Processes	GO:1903039	positive regulation of leukocyte cell-cell adhesion	-16.2767	-13.3911	21/265	240,399,972,1378,3108,3109,3112,3113,3115,3117,3119,3122,3123,3127,3566,4067,5777,6850,8631,9308,84433	ALOX5,RHOH,CD74,CR1,HLA-DMA,HLA-DMB,HLA-DOB,HLA-DPA1,HLA-DPB1,HLA-DQA1,HLA-DQB1,HLA-DRA,HLA-DRB1,HLA-DRB5,IL4R,LYN,PTPN6,SYK,SKAP1,CD83,CARD11
2_Member	KEGG Pathway	hsa05140	Leishmaniasis	-16.1262	-13.2833	14/77	1378,1915,3108,3109,3112,3113,3115,3117,3119,3122,3123,3127,5777,653361	CR1,EEF1A1,HLA-DMA,HLA-DMB,HLA-DOB,HLA-DPA1,HLA-DPB1,HLA-DQA1,HLA-DQB1,HLA-DRA,HLA-DRB1,HLA-DRB5,PTPN6,NCF1
2_Member	GO Biological Processes	GO:0022407	regulation of cell-cell adhesion	-16.0779	-13.2483	26/477	240,399,640,972,1378,3108,3109,3112,3113,3115,3117,3119,3122,3123,3127,3566,4067,5747,5777,6850,8631,8728,9308,23075,57162,84433	ALOX5,RHOH,BLK,CD74,CR1,HLA-DMA,HLA-DMB,HLA-DOB,HLA-DPA1,HLA-DPB1,HLA-DQA1,HLA-DQB1,HLA-DRA,HLA-DRB1,HLA-DRB5,IL4R,LYN,PTK2,PTPN6,SYK,SKAP1,ADAM19,CD83,SWAP70,PELI1,CARD11
2_Member	KEGG Pathway	hsa04640	Hematopoietic cell lineage	-15.9926	-13.176	15/99	931,933,1378,2208,3108,3109,3112,3113,3115,3117,3119,3122,3123,3127,3566	MS4A1,CD22,CR1,FCER2,HLA-DMA,HLA-DMB,HLA-DOB,HLA-DPA1,HLA-DPB1,HLA-DQA1,HLA-DQB1,HLA-DRA,HLA-DRB1,HLA-DRB5,IL4R
2_Member	GO Biological Processes	GO:0022409	positive regulation of cell-cell adhesion	-15.9611	-13.1571	22/312	240,399,972,1378,3108,3109,3112,3113,3115,3117,3119,3122,3123,3127,3566,4067,5777,6850,8631,8728,9308,84433	ALOX5,RHOH,CD74,CR1,HLA-DMA,HLA-DMB,HLA-DOB,HLA-DPA1,HLA-DPB1,HLA-DQA1,HLA-DQB1,HLA-DRA,HLA-DRB1,HLA-DRB5,IL4R,LYN,PTPN6,SYK,SKAP1,ADAM19,CD83,CARD11
2_Member	GO Biological Processes	GO:0002478	antigen processing and presentation of exogenous peptide antigen	-15.2235	-12.4317	11/38	972,3108,3109,3112,3113,3115,3117,3119,3122,3123,3127	CD74,HLA-DMA,HLA-DMB,HLA-DOB,HLA-DPA1,HLA-DPB1,HLA-DQA1,HLA-DQB1,HLA-DRA,HLA-DRB1,HLA-DRB5
2_Member	GO Biological Processes	GO:0030155	regulation of cell adhesion	-15.2066	-12.4267	31/786	71,240,399,596,640,972,1378,3108,3109,3112,3113,3115,3117,3119,3122,3123,3127,3566,4067,5581,5747,5777,6850,8573,8631,8728,9308,10451,23075,57162,84433	ACTG1,ALOX5,RHOH,BCL2,BLK,CD74,CR1,HLA-DMA,HLA-DMB,HLA-DOB,HLA-DPA1,HLA-DPB1,HLA-DQA1,HLA-DQB1,HLA-DRA,HLA-DRB1,HLA-DRB5,IL4R,LYN,PRKCE,PTK2,PTPN6,SYK,CASK,SKAP1,ADAM19,CD83,VAV3,SWAP70,PELI1,CARD11
2_Member	KEGG Pathway	hsa05145	Toxoplasmosis	-15.1614	-12.3931	15/112	240,330,596,3108,3109,3112,3113,3115,3117,3119,3122,3123,3127,4261,10000	ALOX5,BIRC3,BCL2,HLA-DMA,HLA-DMB,HLA-DOB,HLA-DPA1,HLA-DPB1,HLA-DQA1,HLA-DQB1,HLA-DRA,HLA-DRB1,HLA-DRB5,CIITA,AKT3
2_Member	GO Biological Processes	GO:0002381	immunoglobulin production involved in immunoglobulin-mediated immune response	-14.6821	-11.9251	11/42	3108,3109,3112,3113,3115,3117,3119,3122,3123,3127,23075	HLA-DMA,HLA-DMB,HLA-DOB,HLA-DPA1,HLA-DPB1,HLA-DQA1,HLA-DQB1,HLA-DRA,HLA-DRB1,HLA-DRB5,SWAP70
2_Member	GO Biological Processes	GO:0050870	positive regulation of T cell activation	-14.6552	-11.9091	19/243	399,972,1378,3108,3109,3112,3113,3115,3117,3119,3122,3123,3127,3566,4067,5777,6850,9308,84433	RHOH,CD74,CR1,HLA-DMA,HLA-DMB,HLA-DOB,HLA-DPA1,HLA-DPB1,HLA-DQA1,HLA-DQB1,HLA-DRA,HLA-DRB1,HLA-DRB5,IL4R,LYN,PTPN6,SYK,CD83,CARD11
2_Member	GO Biological Processes	GO:1903037	regulation of leukocyte cell-cell adhesion	-14.5646	-11.8293	22/364	240,399,972,1378,3108,3109,3112,3113,3115,3117,3119,3122,3123,3127,3566,4067,5777,6850,8631,9308,57162,84433	ALOX5,RHOH,CD74,CR1,HLA-DMA,HLA-DMB,HLA-DOB,HLA-DPA1,HLA-DPB1,HLA-DQA1,HLA-DQB1,HLA-DRA,HLA-DRB1,HLA-DRB5,IL4R,LYN,PTPN6,SYK,SKAP1,CD83,PELI1,CARD11
2_Member	KEGG Pathway	hsa05152	Tuberculosis	-14.5222	-11.7974	17/180	596,817,972,1378,3108,3109,3112,3113,3115,3117,3119,3122,3123,3127,4261,6850,10000	BCL2,CAMK2D,CD74,CR1,HLA-DMA,HLA-DMB,HLA-DOB,HLA-DPA1,HLA-DPB1,HLA-DQA1,HLA-DQB1,HLA-DRA,HLA-DRB1,HLA-DRB5,CIITA,SYK,AKT3
2_Member	KEGG Pathway	hsa05310	Asthma	-14.4273	-11.7315	10/31	3108,3109,3112,3113,3115,3117,3119,3122,3123,3127	HLA-DMA,HLA-DMB,HLA-DOB,HLA-DPA1,HLA-DPB1,HLA-DQA1,HLA-DQB1,HLA-DRA,HLA-DRB1,HLA-DRB5
2_Member	GO Biological Processes	GO:0048002	antigen processing and presentation of peptide antigen	-14.4263	-11.7315	12/60	972,3108,3109,3112,3113,3115,3117,3119,3122,3123,3127,55016	CD74,HLA-DMA,HLA-DMB,HLA-DOB,HLA-DPA1,HLA-DPB1,HLA-DQA1,HLA-DQB1,HLA-DRA,HLA-DRB1,HLA-DRB5,MARCHF1
2_Member	KEGG Pathway	hsa05416	Viral myocarditis	-14.4263	-11.7315	12/60	71,3108,3109,3112,3113,3115,3117,3119,3122,3123,3127,8672	ACTG1,HLA-DMA,HLA-DMB,HLA-DOB,HLA-DPA1,HLA-DPB1,HLA-DQA1,HLA-DQB1,HLA-DRA,HLA-DRB1,HLA-DRB5,EIF4G3
2_Member	GO Biological Processes	GO:0045785	positive regulation of cell adhesion	-14.2099	-11.5246	24/471	240,399,972,1378,3108,3109,3112,3113,3115,3117,3119,3122,3123,3127,3566,4067,5581,5777,6850,8631,8728,9308,10451,84433	ALOX5,RHOH,CD74,CR1,HLA-DMA,HLA-DMB,HLA-DOB,HLA-DPA1,HLA-DPB1,HLA-DQA1,HLA-DQB1,HLA-DRA,HLA-DRB1,HLA-DRB5,IL4R,LYN,PRKCE,PTPN6,SYK,SKAP1,ADAM19,CD83,VAV3,CARD11
2_Member	GO Biological Processes	GO:0019884	antigen processing and presentation of exogenous antigen	-14.0847	-11.4087	11/47	972,3108,3109,3112,3113,3115,3117,3119,3122,3123,3127	CD74,HLA-DMA,HLA-DMB,HLA-DOB,HLA-DPA1,HLA-DPB1,HLA-DQA1,HLA-DQB1,HLA-DRA,HLA-DRB1,HLA-DRB5
2_Member	GO Biological Processes	GO:0019882	antigen processing and presentation	-13.4554	-10.7976	13/93	972,3108,3109,3112,3113,3115,3117,3119,3122,3123,3127,55016,57705	CD74,HLA-DMA,HLA-DMB,HLA-DOB,HLA-DPA1,HLA-DPB1,HLA-DQA1,HLA-DQB1,HLA-DRA,HLA-DRB1,HLA-DRB5,MARCHF1,WDFY4
2_Member	KEGG Pathway	hsa05330	Allograft rejection	-13.4165	-10.7674	10/38	3108,3109,3112,3113,3115,3117,3119,3122,3123,3127	HLA-DMA,HLA-DMB,HLA-DOB,HLA-DPA1,HLA-DPB1,HLA-DQA1,HLA-DQB1,HLA-DRA,HLA-DRB1,HLA-DRB5
2_Member	GO Biological Processes	GO:0002250	adaptive immune response	-13.24	-10.5995	26/629	972,973,974,1378,3108,3109,3112,3113,3115,3117,3119,3122,3123,3127,3495,3507,3514,3537,3538,3566,4067,4208,6850,8631,23075,60468	CD74,CD79A,CD79B,CR1,HLA-DMA,HLA-DMB,HLA-DOB,HLA-DPA1,HLA-DPB1,HLA-DQA1,HLA-DQB1,HLA-DRA,HLA-DRB1,HLA-DRB5,IGHD,IGHM,IGKC,IGLC1,IGLC2,IL4R,LYN,MEF2C,SYK,SKAP1,SWAP70,BACH2
2_Member	KEGG Pathway	hsa04612	Antigen processing and presentation	-12.9781	-10.3624	12/78	972,3108,3109,3112,3113,3115,3117,3119,3122,3123,3127,4261	CD74,HLA-DMA,HLA-DMB,HLA-DOB,HLA-DPA1,HLA-DPB1,HLA-DQA1,HLA-DQB1,HLA-DRA,HLA-DRB1,HLA-DRB5,CIITA
2_Member	KEGG Pathway	hsa05332	Graft-versus-host disease	-12.933	-10.3253	10/42	3108,3109,3112,3113,3115,3117,3119,3122,3123,3127	HLA-DMA,HLA-DMB,HLA-DOB,HLA-DPA1,HLA-DPB1,HLA-DQA1,HLA-DQB1,HLA-DRA,HLA-DRB1,HLA-DRB5
2_Member	KEGG Pathway	hsa04940	Type I diabetes mellitus	-12.8205	-10.2206	10/43	3108,3109,3112,3113,3115,3117,3119,3122,3123,3127	HLA-DMA,HLA-DMB,HLA-DOB,HLA-DPA1,HLA-DPB1,HLA-DQA1,HLA-DQB1,HLA-DRA,HLA-DRB1,HLA-DRB5
2_Member	GO Biological Processes	GO:0050863	regulation of T cell activation	-12.5013	-9.93639	20/364	399,972,1378,3108,3109,3112,3113,3115,3117,3119,3122,3123,3127,3566,4067,5777,6850,9308,57162,84433	RHOH,CD74,CR1,HLA-DMA,HLA-DMB,HLA-DOB,HLA-DPA1,HLA-DPB1,HLA-DQA1,HLA-DQB1,HLA-DRA,HLA-DRB1,HLA-DRB5,IL4R,LYN,PTPN6,SYK,CD83,PELI1,CARD11
2_Member	KEGG Pathway	hsa05169	Epstein-Barr virus infection	-12.4991	-9.93639	16/202	596,2208,3108,3109,3112,3113,3115,3117,3119,3122,3123,3127,4067,6850,10000,29760	BCL2,FCER2,HLA-DMA,HLA-DMB,HLA-DOB,HLA-DPA1,HLA-DPB1,HLA-DQA1,HLA-DQB1,HLA-DRA,HLA-DRB1,HLA-DRB5,LYN,SYK,AKT3,BLNK
2_Member	KEGG Pathway	hsa05321	Inflammatory bowel disease	-12.4174	-9.86863	11/65	3108,3109,3112,3113,3115,3117,3119,3122,3123,3127,3566	HLA-DMA,HLA-DMB,HLA-DOB,HLA-DPA1,HLA-DPB1,HLA-DQA1,HLA-DQB1,HLA-DRA,HLA-DRB1,HLA-DRB5,IL4R
2_Member	KEGG Pathway	hsa04672	Intestinal immune network for IgA production	-12.2029	-9.67434	10/49	3108,3109,3112,3113,3115,3117,3119,3122,3123,3127	HLA-DMA,HLA-DMB,HLA-DOB,HLA-DPA1,HLA-DPB1,HLA-DQA1,HLA-DQB1,HLA-DRA,HLA-DRB1,HLA-DRB5
2_Member	Reactome Gene Sets	R-HSA-389948	PD-1 signaling	-11.9458	-9.43024	8/23	3113,3115,3117,3119,3122,3123,3127,5777	HLA-DPA1,HLA-DPB1,HLA-DQA1,HLA-DQB1,HLA-DRA,HLA-DRB1,HLA-DRB5,PTPN6
2_Member	KEGG Pathway	hsa05320	Autoimmune thyroid disease	-11.8373	-9.32803	10/53	3108,3109,3112,3113,3115,3117,3119,3122,3123,3127	HLA-DMA,HLA-DMB,HLA-DOB,HLA-DPA1,HLA-DPB1,HLA-DQA1,HLA-DQB1,HLA-DRA,HLA-DRB1,HLA-DRB5
2_Member	Reactome Gene Sets	R-HSA-877300	Interferon gamma signaling	-10.757	-8.29542	11/91	817,3113,3115,3117,3119,3122,3123,3127,3394,4261,5777	CAMK2D,HLA-DPA1,HLA-DPB1,HLA-DQA1,HLA-DQB1,HLA-DRA,HLA-DRB1,HLA-DRB5,IRF8,CIITA,PTPN6
2_Member	Reactome Gene Sets	R-HSA-202430	Translocation of ZAP-70 to Immunological synapse	-10.7185	-8.26249	7/19	3113,3115,3117,3119,3122,3123,3127	HLA-DPA1,HLA-DPB1,HLA-DQA1,HLA-DQB1,HLA-DRA,HLA-DRB1,HLA-DRB5
2_Member	KEGG Pathway	hsa04658	Th1 and Th2 cell differentiation	-10.7041	-8.25367	11/92	3108,3109,3112,3113,3115,3117,3119,3122,3123,3127,3566	HLA-DMA,HLA-DMB,HLA-DOB,HLA-DPA1,HLA-DPB1,HLA-DQA1,HLA-DQB1,HLA-DRA,HLA-DRB1,HLA-DRB5,IL4R
2_Member	KEGG Pathway	hsa04145	Phagosome	-10.6723	-8.22732	13/152	71,3108,3109,3112,3113,3115,3117,3119,3122,3123,3127,8417,653361	ACTG1,HLA-DMA,HLA-DMB,HLA-DOB,HLA-DPA1,HLA-DPB1,HLA-DQA1,HLA-DQB1,HLA-DRA,HLA-DRB1,HLA-DRB5,STX7,NCF1
2_Member	KEGG Pathway	hsa05323	Rheumatoid arthritis	-10.6519	-8.22287	11/93	3108,3109,3112,3113,3115,3117,3119,3122,3123,3127,4050	HLA-DMA,HLA-DMB,HLA-DOB,HLA-DPA1,HLA-DPB1,HLA-DQA1,HLA-DQB1,HLA-DRA,HLA-DRB1,HLA-DRB5,LTB
2_Member	Reactome Gene Sets	R-HSA-388841	Costimulation by the CD28 family	-10.6343	-8.21053	10/69	3113,3115,3117,3119,3122,3123,3127,4067,5777,10000	HLA-DPA1,HLA-DPB1,HLA-DQA1,HLA-DQB1,HLA-DRA,HLA-DRB1,HLA-DRB5,LYN,PTPN6,AKT3
2_Member	GO Biological Processes	GO:0002377	immunoglobulin production	-10.6003	-8.18163	13/154	3108,3109,3112,3113,3115,3117,3119,3122,3123,3127,3514,23075,29802	HLA-DMA,HLA-DMB,HLA-DOB,HLA-DPA1,HLA-DPB1,HLA-DQA1,HLA-DQB1,HLA-DRA,HLA-DRB1,HLA-DRB5,IGKC,SWAP70,VPREB3
2_Member	GO Biological Processes	GO:0002440	production of molecular mediator of immune response	-10.4942	-8.08564	13/157	3108,3109,3112,3113,3115,3117,3119,3122,3123,3127,3514,23075,29802	HLA-DMA,HLA-DMB,HLA-DOB,HLA-DPA1,HLA-DPB1,HLA-DQA1,HLA-DQB1,HLA-DRA,HLA-DRB1,HLA-DRB5,IGKC,SWAP70,VPREB3
2_Member	Reactome Gene Sets	R-HSA-202427	Phosphorylation of CD3 and TCR zeta chains	-10.196	-7.81175	7/22	3113,3115,3117,3119,3122,3123,3127	HLA-DPA1,HLA-DPB1,HLA-DQA1,HLA-DQB1,HLA-DRA,HLA-DRB1,HLA-DRB5
2_Member	KEGG Pathway	hsa05164	Influenza A	-10.0273	-7.65692	13/171	71,3108,3109,3112,3113,3115,3117,3119,3122,3123,3127,4261,10000	ACTG1,HLA-DMA,HLA-DMB,HLA-DOB,HLA-DPA1,HLA-DPB1,HLA-DQA1,HLA-DQB1,HLA-DRA,HLA-DRB1,HLA-DRB5,CIITA,AKT3
2_Member	KEGG Pathway	hsa04659	Th17 cell differentiation	-9.9354	-7.5696	11/108	3108,3109,3112,3113,3115,3117,3119,3122,3123,3127,3566	HLA-DMA,HLA-DMB,HLA-DOB,HLA-DPA1,HLA-DPB1,HLA-DQA1,HLA-DQB1,HLA-DRA,HLA-DRB1,HLA-DRB5,IL4R
2_Member	WikiPathways	WP2328	Allograft rejection	-9.50776	-7.17672	10/89	3108,3109,3112,3113,3115,3117,3119,3122,3123,3127	HLA-DMA,HLA-DMB,HLA-DOB,HLA-DPA1,HLA-DPB1,HLA-DQA1,HLA-DQB1,HLA-DRA,HLA-DRB1,HLA-DRB5
2_Member	Reactome Gene Sets	R-HSA-913531	Interferon Signaling	-9.20983	-6.90315	13/199	817,3113,3115,3117,3119,3122,3123,3127,3394,3669,4261,5777,8672	CAMK2D,HLA-DPA1,HLA-DPB1,HLA-DQA1,HLA-DQB1,HLA-DRA,HLA-DRB1,HLA-DRB5,IRF8,ISG20,CIITA,PTPN6,EIF4G3
2_Member	KEGG Pathway	hsa05150	Staphylococcus aureus infection	-9.17861	-6.87586	10/96	3108,3109,3112,3113,3115,3117,3119,3122,3123,3127	HLA-DMA,HLA-DMB,HLA-DOB,HLA-DPA1,HLA-DPB1,HLA-DQA1,HLA-DQB1,HLA-DRA,HLA-DRB1,HLA-DRB5
2_Member	WikiPathways	WP4217	Ebola virus infection in host	-9.02739	-6.72853	11/131	71,3108,3109,3112,3113,3115,3117,3119,3122,3123,3127	ACTG1,HLA-DMA,HLA-DMB,HLA-DOB,HLA-DPA1,HLA-DPB1,HLA-DQA1,HLA-DQB1,HLA-DRA,HLA-DRB1,HLA-DRB5
2_Member	KEGG Pathway	hsa05322	Systemic lupus erythematosus	-8.85345	-6.56228	11/136	3108,3109,3112,3113,3115,3117,3119,3122,3123,3127,8364	HLA-DMA,HLA-DMB,HLA-DOB,HLA-DPA1,HLA-DPB1,HLA-DQA1,HLA-DQB1,HLA-DRA,HLA-DRB1,HLA-DRB5,H4C3
2_Member	Reactome Gene Sets	R-HSA-202433	Generation of second messenger molecules	-8.7254	-6.44179	7/34	3113,3115,3117,3119,3122,3123,3127	HLA-DPA1,HLA-DPB1,HLA-DQA1,HLA-DQB1,HLA-DRA,HLA-DRB1,HLA-DRB5
2_Member	KEGG Pathway	hsa04514	Cell adhesion molecules	-8.43262	-6.15643	11/149	933,3108,3109,3112,3113,3115,3117,3119,3122,3123,3127	CD22,HLA-DMA,HLA-DMB,HLA-DOB,HLA-DPA1,HLA-DPB1,HLA-DQA1,HLA-DQB1,HLA-DRA,HLA-DRB1,HLA-DRB5
2_Member	Reactome Gene Sets	R-HSA-2132295	MHC class II antigen presentation	-8.11981	-5.86865	10/123	972,3109,3112,3113,3115,3117,3119,3122,3123,3127	CD74,HLA-DMB,HLA-DOB,HLA-DPA1,HLA-DPB1,HLA-DQA1,HLA-DQB1,HLA-DRA,HLA-DRB1,HLA-DRB5
2_Member	KEGG Pathway	hsa05168	Herpes simplex virus 1 infection	-7.59838	-5.38702	17/495	330,596,972,3108,3109,3112,3113,3115,3117,3119,3122,3123,3127,5452,6850,9451,10000	BIRC3,BCL2,CD74,HLA-DMA,HLA-DMB,HLA-DOB,HLA-DPA1,HLA-DPB1,HLA-DQA1,HLA-DQB1,HLA-DRA,HLA-DRB1,HLA-DRB5,POU2F2,SYK,EIF2AK3,AKT3
2_Member	KEGG Pathway	hsa05166	Human T-cell leukemia virus 1 infection	-6.64922	-4.51066	11/222	3108,3109,3112,3113,3115,3117,3119,3122,3123,3127,10000	HLA-DMA,HLA-DMB,HLA-DOB,HLA-DPA1,HLA-DPB1,HLA-DQA1,HLA-DQB1,HLA-DRA,HLA-DRB1,HLA-DRB5,AKT3
2_Member	Reactome Gene Sets	R-HSA-202424	Downstream TCR signaling	-6.61785	-4.48197	8/98	3113,3115,3117,3119,3122,3123,3127,84433	HLA-DPA1,HLA-DPB1,HLA-DQA1,HLA-DQB1,HLA-DRA,HLA-DRB1,HLA-DRB5,CARD11
2_Member	Reactome Gene Sets	R-HSA-202403	TCR signaling	-5.94259	-3.84494	8/120	3113,3115,3117,3119,3122,3123,3127,84433	HLA-DPA1,HLA-DPB1,HLA-DQA1,HLA-DQB1,HLA-DRA,HLA-DRB1,HLA-DRB5,CARD11
3_Summary	WikiPathways	WP5218	Extrafollicular B cell activation by SARS-CoV-2	-16.3843	-13.4834	14/74	931,933,969,973,1378,3394,3732,5079,6850,9168,9839,29760,60468,100885789	MS4A1,CD22,CD69,CD79A,CR1,IRF8,CD82,PAX5,SYK,TMSB10,ZEB2,BLNK,BACH2,IFNG-AS1
3_Member	WikiPathways	WP5218	Extrafollicular B cell activation by SARS-CoV-2	-16.3843	-13.4834	14/74	931,933,969,973,1378,3394,3732,5079,6850,9168,9839,29760,60468,100885789	MS4A1,CD22,CD69,CD79A,CR1,IRF8,CD82,PAX5,SYK,TMSB10,ZEB2,BLNK,BACH2,IFNG-AS1
4_Summary	GO Biological Processes	GO:0050864	regulation of B cell activation	-16.2282	-13.3573	19/200	596,640,933,972,1378,3495,3507,3514,3537,3538,4067,4208,5777,6850,10451,22806,55024,57162,84433,3109,3113,3115,3123,5747,3394,3566,4050,5144,5452,9308,9451	BCL2,BLK,CD22,CD74,CR1,IGHD,IGHM,IGKC,IGLC1,IGLC2,LYN,MEF2C,PTPN6,SYK,VAV3,IKZF3,BANK1,PELI1,CARD11,HLA-DMB,HLA-DPA1,HLA-DPB1,HLA-DRB1,PTK2,IRF8,IL4R,LTB,PDE4D,POU2F2,CD83,EIF2AK3
4_Member	GO Biological Processes	GO:0050864	regulation of B cell activation	-16.2282	-13.3573	19/200	596,640,933,972,1378,3495,3507,3514,3537,3538,4067,4208,5777,6850,10451,22806,55024,57162,84433	BCL2,BLK,CD22,CD74,CR1,IGHD,IGHM,IGKC,IGLC1,IGLC2,LYN,MEF2C,PTPN6,SYK,VAV3,IKZF3,BANK1,PELI1,CARD11
4_Member	GO Biological Processes	GO:0070663	regulation of leukocyte proliferation	-13.1369	-10.5131	18/255	596,640,933,972,1378,3109,3113,3115,3123,4067,4208,5747,5777,6850,10451,22806,57162,84433	BCL2,BLK,CD22,CD74,CR1,HLA-DMB,HLA-DPA1,HLA-DPB1,HLA-DRB1,LYN,MEF2C,PTK2,PTPN6,SYK,VAV3,IKZF3,PELI1,CARD11
4_Member	GO Biological Processes	GO:0050670	regulation of lymphocyte proliferation	-12.7271	-10.1349	17/231	596,640,933,972,1378,3109,3113,3115,3123,4067,4208,5777,6850,10451,22806,57162,84433	BCL2,BLK,CD22,CD74,CR1,HLA-DMB,HLA-DPA1,HLA-DPB1,HLA-DRB1,LYN,MEF2C,PTPN6,SYK,VAV3,IKZF3,PELI1,CARD11
4_Member	GO Biological Processes	GO:0032944	regulation of mononuclear cell proliferation	-12.6357	-10.0585	17/234	596,640,933,972,1378,3109,3113,3115,3123,4067,4208,5777,6850,10451,22806,57162,84433	BCL2,BLK,CD22,CD74,CR1,HLA-DMB,HLA-DPA1,HLA-DPB1,HLA-DRB1,LYN,MEF2C,PTPN6,SYK,VAV3,IKZF3,PELI1,CARD11
4_Member	GO Biological Processes	GO:0030888	regulation of B cell proliferation	-10.9735	-8.49462	10/64	596,640,933,972,4067,4208,10451,22806,57162,84433	BCL2,BLK,CD22,CD74,LYN,MEF2C,VAV3,IKZF3,PELI1,CARD11
4_Member	GO Biological Processes	GO:0050871	positive regulation of B cell activation	-9.4869	-7.16002	12/152	596,972,3495,3507,3514,3537,3538,4208,6850,10451,57162,84433	BCL2,CD74,IGHD,IGHM,IGKC,IGLC1,IGLC2,MEF2C,SYK,VAV3,PELI1,CARD11
4_Member	GO Biological Processes	GO:0070665	positive regulation of leukocyte proliferation	-9.26048	-6.94984	12/159	596,972,3109,3113,3115,4067,4208,5747,6850,10451,57162,84433	BCL2,CD74,HLA-DMB,HLA-DPA1,HLA-DPB1,LYN,MEF2C,PTK2,SYK,VAV3,PELI1,CARD11
4_Member	GO Biological Processes	GO:0050671	positive regulation of lymphocyte proliferation	-7.51938	-5.31119	10/142	596,972,3109,3113,3115,4208,6850,10451,57162,84433	BCL2,CD74,HLA-DMB,HLA-DPA1,HLA-DPB1,MEF2C,SYK,VAV3,PELI1,CARD11
4_Member	GO Biological Processes	GO:0032946	positive regulation of mononuclear cell proliferation	-7.46146	-5.2626	10/144	596,972,3109,3113,3115,4208,6850,10451,57162,84433	BCL2,CD74,HLA-DMB,HLA-DPA1,HLA-DPB1,MEF2C,SYK,VAV3,PELI1,CARD11
4_Member	GO Biological Processes	GO:0030890	positive regulation of B cell proliferation	-6.55048	-4.41725	6/42	596,972,4208,10451,57162,84433	BCL2,CD74,MEF2C,VAV3,PELI1,CARD11
4_Member	GO Biological Processes	GO:0042129	regulation of T cell proliferation	-5.67186	-3.59486	9/175	1378,3109,3113,3115,3123,5777,6850,57162,84433	CR1,HLA-DMB,HLA-DPA1,HLA-DPB1,HLA-DRB1,PTPN6,SYK,PELI1,CARD11
4_Member	GO Biological Processes	GO:0001819	positive regulation of cytokine production	-5.50387	-3.4436	14/481	972,3113,3115,3394,3495,3566,4050,5144,5452,6850,9308,9451,57162,84433	CD74,HLA-DPA1,HLA-DPB1,IRF8,IGHD,IL4R,LTB,PDE4D,POU2F2,SYK,CD83,EIF2AK3,PELI1,CARD11
4_Member	GO Biological Processes	GO:0042102	positive regulation of T cell proliferation	-3.24315	-1.44775	5/104	3109,3113,3115,6850,84433	HLA-DMB,HLA-DPA1,HLA-DPB1,SYK,CARD11
5_Summary	Reactome Gene Sets	R-HSA-983695	Antigen activates B Cell Receptor (BCR) leading to generation of second messengers	-16.1787	-13.322	11/32	640,933,973,974,3708,4067,5777,6850,29760,80228,118788,4208,8395,25780,84433,10000,10451,596,931,3394,7163,9734,22806,23075,55024,115350,972,3109,3112,3113,3115,3117,3119,3122,3123,3127,7325,653361,71,399,5581,57705,5452,4050,4643,23094	BLK,CD22,CD79A,CD79B,ITPR1,LYN,PTPN6,SYK,BLNK,ORAI2,PIK3AP1,MEF2C,PIP5K1B,RASGRP3,CARD11,AKT3,VAV3,BCL2,MS4A1,IRF8,TPD52,HDAC9,IKZF3,SWAP70,BANK1,FCRL1,CD74,HLA-DMB,HLA-DOB,HLA-DPA1,HLA-DPB1,HLA-DQA1,HLA-DQB1,HLA-DRA,HLA-DRB1,HLA-DRB5,UBE2E2,NCF1,ACTG1,RHOH,PRKCE,WDFY4,POU2F2,LTB,MYO1E,SIPA1L3
5_Member	Reactome Gene Sets	R-HSA-983695	Antigen activates B Cell Receptor (BCR) leading to generation of second messengers	-16.1787	-13.322	11/32	640,933,973,974,3708,4067,5777,6850,29760,80228,118788	BLK,CD22,CD79A,CD79B,ITPR1,LYN,PTPN6,SYK,BLNK,ORAI2,PIK3AP1
5_Member	WikiPathways	WP23	B cell receptor signaling pathway	-13.1515	-10.5194	13/98	640,933,973,974,4067,4208,5777,6850,8395,25780,29760,84433,118788	BLK,CD22,CD79A,CD79B,LYN,MEF2C,PTPN6,SYK,PIP5K1B,RASGRP3,BLNK,CARD11,PIK3AP1
5_Member	KEGG Pathway	hsa04662	B cell receptor signaling pathway	-12.7073	-10.1226	12/82	933,973,974,4067,5777,6850,10000,10451,25780,29760,84433,118788	CD22,CD79A,CD79B,LYN,PTPN6,SYK,AKT3,VAV3,RASGRP3,BLNK,CARD11,PIK3AP1
5_Member	GO Biological Processes	GO:0042113	B cell activation	-12.4338	-9.87813	15/170	596,931,933,973,974,3394,4208,7163,9734,22806,23075,29760,55024,84433,115350	BCL2,MS4A1,CD22,CD79A,CD79B,IRF8,MEF2C,TPD52,HDAC9,IKZF3,SWAP70,BLNK,BANK1,CARD11,FCRL1
5_Member	Reactome Gene Sets	R-HSA-983705	Signaling by the B Cell Receptor (BCR)	-12.3846	-9.84268	13/112	640,933,973,974,3708,4067,5777,6850,25780,29760,80228,84433,118788	BLK,CD22,CD79A,CD79B,ITPR1,LYN,PTPN6,SYK,RASGRP3,BLNK,ORAI2,CARD11,PIK3AP1
5_Member	Reactome Gene Sets	R-HSA-1280218	Adaptive Immune System	-11.261	-8.76422	26/769	640,933,972,973,974,3109,3112,3113,3115,3117,3119,3122,3123,3127,3708,4067,5777,6850,7325,10000,25780,29760,80228,84433,118788,653361	BLK,CD22,CD74,CD79A,CD79B,HLA-DMB,HLA-DOB,HLA-DPA1,HLA-DPB1,HLA-DQA1,HLA-DQB1,HLA-DRA,HLA-DRB1,HLA-DRB5,ITPR1,LYN,PTPN6,SYK,UBE2E2,AKT3,RASGRP3,BLNK,ORAI2,CARD11,PIK3AP1,NCF1
5_Member	GO Biological Processes	GO:0001775	cell activation	-11.2489	-8.75814	24/647	71,399,596,931,933,972,973,974,3394,4067,4208,5581,5777,6850,7163,9734,10451,22806,23075,29760,55024,57705,84433,115350	ACTG1,RHOH,BCL2,MS4A1,CD22,CD74,CD79A,CD79B,IRF8,LYN,MEF2C,PRKCE,PTPN6,SYK,TPD52,HDAC9,VAV3,IKZF3,SWAP70,BLNK,BANK1,WDFY4,CARD11,FCRL1
5_Member	Reactome Gene Sets	R-HSA-5690714	CD22 mediated BCR regulation	-10.9833	-8.49855	5/5	933,973,974,4067,5777	CD22,CD79A,CD79B,LYN,PTPN6
5_Member	GO Biological Processes	GO:0046649	lymphocyte activation	-10.4858	-8.08217	19/417	399,596,931,933,972,973,974,3394,4208,6850,7163,9734,22806,23075,29760,55024,57705,84433,115350	RHOH,BCL2,MS4A1,CD22,CD74,CD79A,CD79B,IRF8,MEF2C,SYK,TPD52,HDAC9,IKZF3,SWAP70,BLNK,BANK1,WDFY4,CARD11,FCRL1
5_Member	GO Biological Processes	GO:0045321	leukocyte activation	-10.473	-8.07428	21/526	399,596,931,933,972,973,974,3394,4067,4208,5581,6850,7163,9734,22806,23075,29760,55024,57705,84433,115350	RHOH,BCL2,MS4A1,CD22,CD74,CD79A,CD79B,IRF8,LYN,MEF2C,PRKCE,SYK,TPD52,HDAC9,IKZF3,SWAP70,BLNK,BANK1,WDFY4,CARD11,FCRL1
5_Member	Canonical Pathways	M10	PID BCR 5PATHWAY	-9.56632	-7.22685	9/63	933,973,974,4067,5452,5777,6850,29760,84433	CD22,CD79A,CD79B,LYN,POU2F2,PTPN6,SYK,BLNK,CARD11
5_Member	GO Biological Processes	GO:0002520	immune system development	-8.25252	-5.98723	21/699	399,596,640,931,972,973,974,3123,3394,4050,4067,4208,4643,5777,6850,7163,9734,23075,23094,29760,84433	RHOH,BCL2,BLK,MS4A1,CD74,CD79A,CD79B,HLA-DRB1,IRF8,LTB,LYN,MEF2C,MYO1E,PTPN6,SYK,TPD52,HDAC9,SWAP70,SIPA1L3,BLNK,CARD11
5_Member	GO Biological Processes	GO:1903131	mononuclear cell differentiation	-8.07828	-5.83401	14/295	399,596,640,931,972,973,974,3394,4067,6850,7163,9734,29760,84433	RHOH,BCL2,BLK,MS4A1,CD74,CD79A,CD79B,IRF8,LYN,SYK,TPD52,HDAC9,BLNK,CARD11
5_Member	GO Biological Processes	GO:0048534	hematopoietic or lymphoid organ development	-7.99671	-5.75923	20/655	399,596,640,931,972,973,974,3123,3394,4050,4067,4208,4643,5777,6850,7163,9734,23094,29760,84433	RHOH,BCL2,BLK,MS4A1,CD74,CD79A,CD79B,HLA-DRB1,IRF8,LTB,LYN,MEF2C,MYO1E,PTPN6,SYK,TPD52,HDAC9,SIPA1L3,BLNK,CARD11
5_Member	GO Biological Processes	GO:0002521	leukocyte differentiation	-7.89124	-5.66044	15/358	399,596,640,931,972,973,974,3123,3394,4067,6850,7163,9734,29760,84433	RHOH,BCL2,BLK,MS4A1,CD74,CD79A,CD79B,HLA-DRB1,IRF8,LYN,SYK,TPD52,HDAC9,BLNK,CARD11
5_Member	GO Biological Processes	GO:0030097	hemopoiesis	-7.8013	-5.58033	19/606	399,596,640,931,972,973,974,3123,3394,4067,4208,4643,5777,6850,7163,9734,23094,29760,84433	RHOH,BCL2,BLK,MS4A1,CD74,CD79A,CD79B,HLA-DRB1,IRF8,LYN,MEF2C,MYO1E,PTPN6,SYK,TPD52,HDAC9,SIPA1L3,BLNK,CARD11
5_Member	GO Biological Processes	GO:0030183	B cell differentiation	-7.05767	-4.88569	9/120	596,931,973,974,3394,7163,9734,29760,84433	BCL2,MS4A1,CD79A,CD79B,IRF8,TPD52,HDAC9,BLNK,CARD11
5_Member	GO Biological Processes	GO:0030098	lymphocyte differentiation	-6.92378	-4.76604	12/257	399,596,931,972,973,974,3394,6850,7163,9734,29760,84433	RHOH,BCL2,MS4A1,CD74,CD79A,CD79B,IRF8,SYK,TPD52,HDAC9,BLNK,CARD11
6_Summary	Reactome Gene Sets	R-HSA-1280215	Cytokine Signaling in Immune system	-13.664	-10.9972	28/715	240,330,596,817,1072,2208,3113,3115,3117,3119,3122,3123,3127,3394,3566,3669,4050,4067,4205,4208,4261,5777,6175,6850,8672,10000,29760,57162	ALOX5,BIRC3,BCL2,CAMK2D,CFL1,FCER2,HLA-DPA1,HLA-DPB1,HLA-DQA1,HLA-DQB1,HLA-DRA,HLA-DRB1,HLA-DRB5,IRF8,IL4R,ISG20,LTB,LYN,MEF2A,MEF2C,CIITA,PTPN6,RPLP0,SYK,EIF4G3,AKT3,BLNK,PELI1
6_Member	Reactome Gene Sets	R-HSA-1280215	Cytokine Signaling in Immune system	-13.664	-10.9972	28/715	240,330,596,817,1072,2208,3113,3115,3117,3119,3122,3123,3127,3394,3566,3669,4050,4067,4205,4208,4261,5777,6175,6850,8672,10000,29760,57162	ALOX5,BIRC3,BCL2,CAMK2D,CFL1,FCER2,HLA-DPA1,HLA-DPB1,HLA-DQA1,HLA-DQB1,HLA-DRA,HLA-DRB1,HLA-DRB5,IRF8,IL4R,ISG20,LTB,LYN,MEF2A,MEF2C,CIITA,PTPN6,RPLP0,SYK,EIF4G3,AKT3,BLNK,PELI1
6_Member	Reactome Gene Sets	R-HSA-449147	Signaling by Interleukins	-4.99203	-2.96202	13/462	240,596,1072,2208,3566,4067,4205,4208,5777,6175,6850,29760,57162	ALOX5,BCL2,CFL1,FCER2,IL4R,LYN,MEF2A,MEF2C,PTPN6,RPLP0,SYK,BLNK,PELI1
7_Summary	Reactome Gene Sets	R-HSA-156902	Peptide chain elongation	-12.2671	-9.73194	12/89	1915,6134,6175,6176,6189,6191,6202,6206,6222,6228,6232,23521,4673,71,1072,4067,5747,7204,10094,10451,6850,817,4208,4512,4513,8364,9451,10000,80205,653361,2530,5777,7405,54625,8672,9215,10090,22906,55790,4946,83943	EEF1A1,RPL10,RPLP0,RPLP1,RPS3A,RPS4X,RPS8,RPS12,RPS18,RPS23,RPS27,RPL13A,NAP1L1,ACTG1,CFL1,LYN,PTK2,TRIO,ARPC3,VAV3,SYK,CAMK2D,MEF2C,COX1,COX2,H4C3,EIF2AK3,AKT3,CHD9,NCF1,FUT8,PTPN6,UVRAG,PARP14,EIF4G3,LARGE1,UST,TRAK1,CSGALNACT1,OAZ1,IMMP2L
7_Member	Reactome Gene Sets	R-HSA-156902	Peptide chain elongation	-12.2671	-9.73194	12/89	1915,6134,6175,6176,6189,6191,6202,6206,6222,6228,6232,23521	EEF1A1,RPL10,RPLP0,RPLP1,RPS3A,RPS4X,RPS8,RPS12,RPS18,RPS23,RPS27,RPL13A
7_Member	Reactome Gene Sets	R-HSA-156842	Eukaryotic Translation Elongation	-12.0325	-9.51054	12/93	1915,6134,6175,6176,6189,6191,6202,6206,6222,6228,6232,23521	EEF1A1,RPL10,RPLP0,RPLP1,RPS3A,RPS4X,RPS8,RPS12,RPS18,RPS23,RPS27,RPL13A
7_Member	CORUM	CORUM:306	Ribosome, cytoplasmic	-11.3852	-8.88226	11/80	6134,6175,6176,6189,6191,6202,6206,6222,6228,6232,23521	RPL10,RPLP0,RPLP1,RPS3A,RPS4X,RPS8,RPS12,RPS18,RPS23,RPS27,RPL13A
7_Member	Reactome Gene Sets	R-HSA-192823	Viral mRNA Translation	-10.8647	-8.39172	11/89	6134,6175,6176,6189,6191,6202,6206,6222,6228,6232,23521	RPL10,RPLP0,RPLP1,RPS3A,RPS4X,RPS8,RPS12,RPS18,RPS23,RPS27,RPL13A
7_Member	WikiPathways	WP477	Cytoplasmic ribosomal proteins	-10.8105	-8.34328	11/90	6134,6175,6176,6189,6191,6202,6206,6222,6228,6232,23521	RPL10,RPLP0,RPLP1,RPS3A,RPS4X,RPS8,RPS12,RPS18,RPS23,RPS27,RPL13A
7_Member	Reactome Gene Sets	R-HSA-2408557	Selenocysteine synthesis	-10.6519	-8.22287	11/93	6134,6175,6176,6189,6191,6202,6206,6222,6228,6232,23521	RPL10,RPLP0,RPLP1,RPS3A,RPS4X,RPS8,RPS12,RPS18,RPS23,RPS27,RPL13A
7_Member	Reactome Gene Sets	R-HSA-72764	Eukaryotic Translation Termination	-10.6519	-8.22287	11/93	6134,6175,6176,6189,6191,6202,6206,6222,6228,6232,23521	RPL10,RPLP0,RPLP1,RPS3A,RPS4X,RPS8,RPS12,RPS18,RPS23,RPS27,RPL13A
7_Member	Reactome Gene Sets	R-HSA-975956	Nonsense Mediated Decay (NMD) independent of the Exon Junction Complex (EJC)	-10.5492	-8.13564	11/95	6134,6175,6176,6189,6191,6202,6206,6222,6228,6232,23521	RPL10,RPLP0,RPLP1,RPS3A,RPS4X,RPS8,RPS12,RPS18,RPS23,RPS27,RPL13A
7_Member	Reactome Gene Sets	R-HSA-72689	Formation of a pool of free 40S subunits	-10.255	-7.86601	11/101	6134,6175,6176,6189,6191,6202,6206,6222,6228,6232,23521	RPL10,RPLP0,RPLP1,RPS3A,RPS4X,RPS8,RPS12,RPS18,RPS23,RPS27,RPL13A
7_Member	Reactome Gene Sets	R-HSA-9633012	Response of EIF2AK4 (GCN2) to amino acid deficiency	-10.255	-7.86601	11/101	6134,6175,6176,6189,6191,6202,6206,6222,6228,6232,23521	RPL10,RPLP0,RPLP1,RPS3A,RPS4X,RPS8,RPS12,RPS18,RPS23,RPS27,RPL13A
7_Member	CORUM	CORUM:3055	Nop56p-associated pre-rRNA complex	-10.1151	-7.73555	11/104	1915,4673,6134,6175,6176,6189,6202,6206,6222,6228,23521	EEF1A1,NAP1L1,RPL10,RPLP0,RPLP1,RPS3A,RPS8,RPS12,RPS18,RPS23,RPL13A
7_Member	Reactome Gene Sets	R-HSA-156827	L13a-mediated translational silencing of Ceruloplasmin expression	-9.80537	-7.44407	11/111	6134,6175,6176,6189,6191,6202,6206,6222,6228,6232,23521	RPL10,RPLP0,RPLP1,RPS3A,RPS4X,RPS8,RPS12,RPS18,RPS23,RPS27,RPL13A
7_Member	Reactome Gene Sets	R-HSA-1799339	SRP-dependent cotranslational protein targeting to membrane	-9.76289	-7.41046	11/112	6134,6175,6176,6189,6191,6202,6206,6222,6228,6232,23521	RPL10,RPLP0,RPLP1,RPS3A,RPS4X,RPS8,RPS12,RPS18,RPS23,RPS27,RPL13A
7_Member	Reactome Gene Sets	R-HSA-72706	GTP hydrolysis and joining of the 60S ribosomal subunit	-9.76289	-7.41046	11/112	6134,6175,6176,6189,6191,6202,6206,6222,6228,6232,23521	RPL10,RPLP0,RPLP1,RPS3A,RPS4X,RPS8,RPS12,RPS18,RPS23,RPS27,RPL13A
7_Member	Reactome Gene Sets	R-HSA-927802	Nonsense-Mediated Decay (NMD)	-9.63794	-7.29419	11/115	6134,6175,6176,6189,6191,6202,6206,6222,6228,6232,23521	RPL10,RPLP0,RPLP1,RPS3A,RPS4X,RPS8,RPS12,RPS18,RPS23,RPS27,RPL13A
7_Member	Reactome Gene Sets	R-HSA-975957	Nonsense Mediated Decay (NMD) enhanced by the Exon Junction Complex (EJC)	-9.63794	-7.29419	11/115	6134,6175,6176,6189,6191,6202,6206,6222,6228,6232,23521	RPL10,RPLP0,RPLP1,RPS3A,RPS4X,RPS8,RPS12,RPS18,RPS23,RPS27,RPL13A
7_Member	Reactome Gene Sets	R-HSA-2408522	Selenoamino acid metabolism	-9.51654	-7.18131	11/118	6134,6175,6176,6189,6191,6202,6206,6222,6228,6232,23521	RPL10,RPLP0,RPLP1,RPS3A,RPS4X,RPS8,RPS12,RPS18,RPS23,RPS27,RPL13A
7_Member	Reactome Gene Sets	R-HSA-72613	Eukaryotic Translation Initiation	-9.47684	-7.15815	11/119	6134,6175,6176,6189,6191,6202,6206,6222,6228,6232,23521	RPL10,RPLP0,RPLP1,RPS3A,RPS4X,RPS8,RPS12,RPS18,RPS23,RPS27,RPL13A
7_Member	Reactome Gene Sets	R-HSA-72737	Cap-dependent Translation Initiation	-9.47684	-7.15815	11/119	6134,6175,6176,6189,6191,6202,6206,6222,6228,6232,23521	RPL10,RPLP0,RPLP1,RPS3A,RPS4X,RPS8,RPS12,RPS18,RPS23,RPS27,RPL13A
7_Member	GO Biological Processes	GO:0002181	cytoplasmic translation	-9.3599	-7.04526	11/122	6134,6175,6176,6189,6191,6202,6206,6222,6228,6232,23521	RPL10,RPLP0,RPLP1,RPS3A,RPS4X,RPS8,RPS12,RPS18,RPS23,RPS27,RPL13A
7_Member	Reactome Gene Sets	R-HSA-168273	Influenza Viral RNA Transcription and Replication	-8.88766	-6.59267	11/135	6134,6175,6176,6189,6191,6202,6206,6222,6228,6232,23521	RPL10,RPLP0,RPLP1,RPS3A,RPS4X,RPS8,RPS12,RPS18,RPS23,RPS27,RPL13A
7_Member	CORUM	CORUM:305	40S ribosomal subunit, cytoplasmic	-8.82316	-6.53579	7/33	6189,6191,6202,6206,6222,6228,6232	RPS3A,RPS4X,RPS8,RPS12,RPS18,RPS23,RPS27
7_Member	Reactome Gene Sets	R-HSA-168255	Influenza Infection	-8.22267	-5.96451	11/156	6134,6175,6176,6189,6191,6202,6206,6222,6228,6232,23521	RPL10,RPLP0,RPLP1,RPS3A,RPS4X,RPS8,RPS12,RPS18,RPS23,RPS27,RPL13A
7_Member	Reactome Gene Sets	R-HSA-9711097	Cellular response to starvation	-8.22267	-5.96451	11/156	6134,6175,6176,6189,6191,6202,6206,6222,6228,6232,23521	RPL10,RPLP0,RPLP1,RPS3A,RPS4X,RPS8,RPS12,RPS18,RPS23,RPS27,RPL13A
7_Member	KEGG Pathway	hsa03010	Ribosome	-8.16462	-5.90997	11/158	6134,6175,6176,6189,6191,6202,6206,6222,6228,6232,23521	RPL10,RPLP0,RPLP1,RPS3A,RPS4X,RPS8,RPS12,RPS18,RPS23,RPS27,RPL13A
7_Member	Reactome Gene Sets	R-HSA-9010553	Regulation of expression of SLITs and ROBOs	-7.80629	-5.58207	11/171	6134,6175,6176,6189,6191,6202,6206,6222,6228,6232,23521	RPL10,RPLP0,RPLP1,RPS3A,RPS4X,RPS8,RPS12,RPS18,RPS23,RPS27,RPL13A
7_Member	Reactome Gene Sets	R-HSA-422475	Axon guidance	-7.67311	-5.45858	18/552	71,1072,4067,5747,6134,6175,6176,6189,6191,6202,6206,6222,6228,6232,7204,10094,10451,23521	ACTG1,CFL1,LYN,PTK2,RPL10,RPLP0,RPLP1,RPS3A,RPS4X,RPS8,RPS12,RPS18,RPS23,RPS27,TRIO,ARPC3,VAV3,RPL13A
7_Member	Reactome Gene Sets	R-HSA-9754678	SARS-CoV-2 modulates host translation machinery	-7.49434	-5.28929	7/50	6189,6191,6202,6206,6222,6228,6232	RPS3A,RPS4X,RPS8,RPS12,RPS18,RPS23,RPS27
7_Member	Reactome Gene Sets	R-HSA-6791226	Major pathway of rRNA processing in the nucleolus and cytosol	-7.47738	-5.27543	11/184	6134,6175,6176,6189,6191,6202,6206,6222,6228,6232,23521	RPL10,RPLP0,RPLP1,RPS3A,RPS4X,RPS8,RPS12,RPS18,RPS23,RPS27,RPL13A
7_Member	Reactome Gene Sets	R-HSA-72695	Formation of the ternary complex, and subsequently, the 43S complex	-7.43258	-5.2368	7/51	6189,6191,6202,6206,6222,6228,6232	RPS3A,RPS4X,RPS8,RPS12,RPS18,RPS23,RPS27
7_Member	KEGG Pathway	hsa05171	Coronavirus disease - COVID-19	-7.40902	-5.21628	12/232	6134,6175,6176,6189,6191,6202,6206,6222,6228,6232,6850,23521	RPL10,RPLP0,RPLP1,RPS3A,RPS4X,RPS8,RPS12,RPS18,RPS23,RPS27,SYK,RPL13A
7_Member	Reactome Gene Sets	R-HSA-2262752	Cellular responses to stress	-7.39668	-5.20697	21/784	817,1915,4208,4512,4513,6134,6175,6176,6189,6191,6202,6206,6222,6228,6232,8364,9451,10000,23521,80205,653361	CAMK2D,EEF1A1,MEF2C,COX1,COX2,RPL10,RPLP0,RPLP1,RPS3A,RPS4X,RPS8,RPS12,RPS18,RPS23,RPS27,H4C3,EIF2AK3,AKT3,RPL13A,CHD9,NCF1
7_Member	Reactome Gene Sets	R-HSA-9675108	Nervous system development	-7.38211	-5.19541	18/577	71,1072,4067,5747,6134,6175,6176,6189,6191,6202,6206,6222,6228,6232,7204,10094,10451,23521	ACTG1,CFL1,LYN,PTK2,RPL10,RPLP0,RPLP1,RPS3A,RPS4X,RPS8,RPS12,RPS18,RPS23,RPS27,TRIO,ARPC3,VAV3,RPL13A
7_Member	CORUM	CORUM:338	40S ribosomal subunit, cytoplasmic	-7.37775	-5.19403	6/31	6189,6191,6202,6206,6222,6228	RPS3A,RPS4X,RPS8,RPS12,RPS18,RPS23
7_Member	Reactome Gene Sets	R-HSA-8953897	Cellular responses to stimuli	-7.267	-5.08625	21/798	817,1915,4208,4512,4513,6134,6175,6176,6189,6191,6202,6206,6222,6228,6232,8364,9451,10000,23521,80205,653361	CAMK2D,EEF1A1,MEF2C,COX1,COX2,RPL10,RPLP0,RPLP1,RPS3A,RPS4X,RPS8,RPS12,RPS18,RPS23,RPS27,H4C3,EIF2AK3,AKT3,RPL13A,CHD9,NCF1
7_Member	Reactome Gene Sets	R-HSA-8868773	rRNA processing in the nucleus and cytosol	-7.24176	-5.06395	11/194	6134,6175,6176,6189,6191,6202,6206,6222,6228,6232,23521	RPL10,RPLP0,RPLP1,RPS3A,RPS4X,RPS8,RPS12,RPS18,RPS23,RPS27,RPL13A
7_Member	Reactome Gene Sets	R-HSA-72649	Translation initiation complex formation	-7.03457	-4.86834	7/58	6189,6191,6202,6206,6222,6228,6232	RPS3A,RPS4X,RPS8,RPS12,RPS18,RPS23,RPS27
7_Member	Reactome Gene Sets	R-HSA-72702	Ribosomal scanning and start codon recognition	-7.03457	-4.86834	7/58	6189,6191,6202,6206,6222,6228,6232	RPS3A,RPS4X,RPS8,RPS12,RPS18,RPS23,RPS27
7_Member	Reactome Gene Sets	R-HSA-72312	rRNA processing	-7.01953	-4.85615	11/204	6134,6175,6176,6189,6191,6202,6206,6222,6228,6232,23521	RPL10,RPLP0,RPLP1,RPS3A,RPS4X,RPS8,RPS12,RPS18,RPS23,RPS27,RPL13A
7_Member	Reactome Gene Sets	R-HSA-72662	Activation of the mRNA upon binding of the cap-binding complex and eIFs, and subsequent binding to 43S	-6.98208	-4.82153	7/59	6189,6191,6202,6206,6222,6228,6232	RPS3A,RPS4X,RPS8,RPS12,RPS18,RPS23,RPS27
7_Member	Reactome Gene Sets	R-HSA-376176	Signaling by ROBO receptors	-6.72846	-4.58179	11/218	6134,6175,6176,6189,6191,6202,6206,6222,6228,6232,23521	RPL10,RPLP0,RPLP1,RPS3A,RPS4X,RPS8,RPS12,RPS18,RPS23,RPS27,RPL13A
7_Member	Reactome Gene Sets	R-HSA-9694516	SARS-CoV-2 Infection	-6.44132	-4.31596	12/285	2530,5777,6189,6191,6202,6206,6222,6228,6232,7405,10000,54625	FUT8,PTPN6,RPS3A,RPS4X,RPS8,RPS12,RPS18,RPS23,RPS27,UVRAG,AKT3,PARP14
7_Member	Reactome Gene Sets	R-HSA-72766	Translation	-6.34512	-4.22494	12/291	1915,6134,6175,6176,6189,6191,6202,6206,6222,6228,6232,23521	EEF1A1,RPL10,RPLP0,RPLP1,RPS3A,RPS4X,RPS8,RPS12,RPS18,RPS23,RPS27,RPL13A
7_Member	Reactome Gene Sets	R-HSA-9705683	SARS-CoV-2-host interactions	-6.09058	-3.98055	10/202	5777,6189,6191,6202,6206,6222,6228,6232,7405,10000	PTPN6,RPS3A,RPS4X,RPS8,RPS12,RPS18,RPS23,RPS27,UVRAG,AKT3
7_Member	GO Biological Processes	GO:0006412	translation	-6.05464	-3.9496	13/369	1915,6134,6175,6176,6189,6191,6202,6206,6222,6228,6232,8672,23521	EEF1A1,RPL10,RPLP0,RPLP1,RPS3A,RPS4X,RPS8,RPS12,RPS18,RPS23,RPS27,EIF4G3,RPL13A
7_Member	GO Biological Processes	GO:0034645	cellular macromolecule biosynthetic process	-5.73288	-3.64488	18/749	1915,2530,6134,6175,6176,6189,6191,6202,6206,6222,6228,6232,8672,9215,10090,22906,23521,55790	EEF1A1,FUT8,RPL10,RPLP0,RPLP1,RPS3A,RPS4X,RPS8,RPS12,RPS18,RPS23,RPS27,EIF4G3,LARGE1,UST,TRAK1,RPL13A,CSGALNACT1
7_Member	GO Biological Processes	GO:0043043	peptide biosynthetic process	-5.71496	-3.62996	13/396	1915,6134,6175,6176,6189,6191,6202,6206,6222,6228,6232,8672,23521	EEF1A1,RPL10,RPLP0,RPLP1,RPS3A,RPS4X,RPS8,RPS12,RPS18,RPS23,RPS27,EIF4G3,RPL13A
7_Member	Reactome Gene Sets	R-HSA-9679506	SARS-CoV Infections	-5.35924	-3.30564	12/362	2530,5777,6189,6191,6202,6206,6222,6228,6232,7405,10000,54625	FUT8,PTPN6,RPS3A,RPS4X,RPS8,RPS12,RPS18,RPS23,RPS27,UVRAG,AKT3,PARP14
7_Member	Reactome Gene Sets	R-HSA-71291	Metabolism of amino acids and derivatives	-5.2157	-3.17298	12/374	4946,6134,6175,6176,6189,6191,6202,6206,6222,6228,6232,23521	OAZ1,RPL10,RPLP0,RPLP1,RPS3A,RPS4X,RPS8,RPS12,RPS18,RPS23,RPS27,RPL13A
7_Member	GO Biological Processes	GO:0006518	peptide metabolic process	-5.03434	-3.00013	14/529	1915,6134,6175,6176,6189,6191,6202,6206,6222,6228,6232,8672,23521,83943	EEF1A1,RPL10,RPLP0,RPLP1,RPS3A,RPS4X,RPS8,RPS12,RPS18,RPS23,RPS27,EIF4G3,RPL13A,IMMP2L
7_Member	GO Biological Processes	GO:0043604	amide biosynthetic process	-4.53436	-2.55017	13/511	1915,6134,6175,6176,6189,6191,6202,6206,6222,6228,6232,8672,23521	EEF1A1,RPL10,RPLP0,RPLP1,RPS3A,RPS4X,RPS8,RPS12,RPS18,RPS23,RPS27,EIF4G3,RPL13A
7_Member	CORUM	CORUM:308	60S ribosomal subunit, cytoplasmic	-3.6247	-1.74792	4/47	6134,6175,6176,23521	RPL10,RPLP0,RPLP1,RPL13A
7_Member	GO Biological Processes	GO:0043603	cellular amide metabolic process	-3.19238	-1.40422	14/792	1915,6134,6175,6176,6189,6191,6202,6206,6222,6228,6232,8672,23521,83943	EEF1A1,RPL10,RPLP0,RPLP1,RPS3A,RPS4X,RPS8,RPS12,RPS18,RPS23,RPS27,EIF4G3,RPL13A,IMMP2L
7_Member	Reactome Gene Sets	R-HSA-8953854	Metabolism of RNA	-2.35541	-0.729969	11/674	6134,6175,6176,6189,6191,6202,6206,6222,6228,6232,23521	RPL10,RPLP0,RPLP1,RPS3A,RPS4X,RPS8,RPS12,RPS18,RPS23,RPS27,RPL13A
7_Member	GO Biological Processes	GO:0042255	ribosome assembly	-2.1263	-0.549819	3/62	6134,6175,6232	RPL10,RPLP0,RPS27
8_Summary	WikiPathways	WP3995	Prion disease pathway	-8.45058	-6.17069	7/37	596,1879,4208,5079,5452,5747,53335,330,490	BCL2,EBF1,MEF2C,PAX5,POU2F2,PTK2,BCL11A,BIRC3,ATP2B1
8_Member	WikiPathways	WP3995	Prion disease pathway	-8.45058	-6.17069	7/37	596,1879,4208,5079,5452,5747,53335	BCL2,EBF1,MEF2C,PAX5,POU2F2,PTK2,BCL11A
8_Member	Canonical Pathways	M195	PID CMYB PATHWAY	-2.67071	-0.973466	4/84	330,490,596,5079	BIRC3,ATP2B1,BCL2,PAX5
9_Summary	Reactome Gene Sets	R-HSA-2029480	Fcgamma receptor (FCGR) dependent phagocytosis	-8.33299	-6.0641	9/86	71,1072,3708,4067,5581,5747,6850,10094,10451,596,817,5452,9451,10000,10010,653361,4205,4208,5777,22800,7114,8395,51741,2788,157,330,640,399,8573,8631,240,6232,8364,4643,83478,83943	ACTG1,CFL1,ITPR1,LYN,PRKCE,PTK2,SYK,ARPC3,VAV3,BCL2,CAMK2D,POU2F2,EIF2AK3,AKT3,TANK,NCF1,MEF2A,MEF2C,PTPN6,RRAS2,TMSB4X,PIP5K1B,WWOX,GNG7,GRK3,BIRC3,BLK,RHOH,CASK,SKAP1,ALOX5,RPS27,H4C3,MYO1E,ARHGAP24,IMMP2L
9_Member	Reactome Gene Sets	R-HSA-2029480	Fcgamma receptor (FCGR) dependent phagocytosis	-8.33299	-6.0641	9/86	71,1072,3708,4067,5581,5747,6850,10094,10451	ACTG1,CFL1,ITPR1,LYN,PRKCE,PTK2,SYK,ARPC3,VAV3
9_Member	KEGG Pathway	hsa05417	Lipid and atherosclerosis	-6.789	-4.63405	11/215	596,817,3708,4067,5452,5747,9451,10000,10010,10451,653361	BCL2,CAMK2D,ITPR1,LYN,POU2F2,PTK2,EIF2AK3,AKT3,TANK,VAV3,NCF1
9_Member	Reactome Gene Sets	R-HSA-9664407	Parasite infection	-5.65588	-3.58657	6/59	71,4067,5747,6850,10094,10451	ACTG1,LYN,PTK2,SYK,ARPC3,VAV3
9_Member	Reactome Gene Sets	R-HSA-9664417	Leishmania phagocytosis	-5.65588	-3.58657	6/59	71,4067,5747,6850,10094,10451	ACTG1,LYN,PTK2,SYK,ARPC3,VAV3
9_Member	Reactome Gene Sets	R-HSA-9664422	FCGR3A-mediated phagocytosis	-5.65588	-3.58657	6/59	71,4067,5747,6850,10094,10451	ACTG1,LYN,PTK2,SYK,ARPC3,VAV3
9_Member	Reactome Gene Sets	R-HSA-2029482	Regulation of actin dynamics for phagocytic cup formation	-5.56979	-3.50727	6/61	71,1072,5747,6850,10094,10451	ACTG1,CFL1,PTK2,SYK,ARPC3,VAV3
9_Member	Reactome Gene Sets	R-HSA-3928662	EPHB-mediated forward signaling	-5.13739	-3.09682	5/42	71,1072,4067,5747,10094	ACTG1,CFL1,LYN,PTK2,ARPC3
9_Member	Reactome Gene Sets	R-HSA-2682334	EPH-Ephrin signaling	-4.53275	-2.55017	6/92	71,1072,4067,5747,10094,10451	ACTG1,CFL1,LYN,PTK2,ARPC3,VAV3
9_Member	KEGG Pathway	hsa05418	Fluid shear stress and atherosclerosis	-4.47075	-2.49375	7/139	71,596,4205,4208,5747,10000,653361	ACTG1,BCL2,MEF2A,MEF2C,PTK2,AKT3,NCF1
9_Member	Reactome Gene Sets	R-HSA-4420097	VEGFA-VEGFR2 Pathway	-4.3526	-2.38474	6/99	71,3708,5747,10000,10451,653361	ACTG1,ITPR1,PTK2,AKT3,VAV3,NCF1
9_Member	KEGG Pathway	hsa05205	Proteoglycans in cancer	-4.23986	-2.28625	8/205	71,817,3708,5747,5777,10000,10451,22800	ACTG1,CAMK2D,ITPR1,PTK2,PTPN6,AKT3,VAV3,RRAS2
9_Member	Reactome Gene Sets	R-HSA-194138	Signaling by VEGF	-4.14092	-2.19768	6/108	71,3708,5747,10000,10451,653361	ACTG1,ITPR1,PTK2,AKT3,VAV3,NCF1
9_Member	KEGG Pathway	hsa04810	Regulation of actin cytoskeleton	-4.05333	-2.12521	8/218	71,1072,5747,7114,8395,10094,10451,22800	ACTG1,CFL1,PTK2,TMSB4X,PIP5K1B,ARPC3,VAV3,RRAS2
9_Member	Reactome Gene Sets	R-HSA-9006934	Signaling by Receptor Tyrosine Kinases	-3.82093	-1.90902	12/521	71,3708,4067,4205,4208,5581,5747,5777,10000,10451,51741,653361	ACTG1,ITPR1,LYN,MEF2A,MEF2C,PRKCE,PTK2,PTPN6,AKT3,VAV3,WWOX,NCF1
9_Member	Reactome Gene Sets	R-HSA-9658195	Leishmania infection	-3.59916	-1.72821	8/254	71,2788,3708,4067,5747,6850,10094,10451	ACTG1,GNG7,ITPR1,LYN,PTK2,SYK,ARPC3,VAV3
9_Member	KEGG Pathway	hsa04062	Chemokine signaling pathway	-3.59393	-1.72443	7/192	157,2788,4067,5747,10000,10451,653361	GRK3,GNG7,LYN,PTK2,AKT3,VAV3,NCF1
9_Member	KEGG Pathway	hsa05135	Yersinia infection	-3.57466	-1.71514	6/137	71,5747,8395,10000,10094,10451	ACTG1,PTK2,PIP5K1B,AKT3,ARPC3,VAV3
9_Member	KEGG Pathway	hsa04510	Focal adhesion	-3.47347	-1.62919	7/201	71,330,596,5747,8395,10000,10451	ACTG1,BIRC3,BCL2,PTK2,PIP5K1B,AKT3,VAV3
9_Member	WikiPathways	WP306	Focal adhesion	-3.46048	-1.61756	7/202	71,330,596,640,5747,10000,10451	ACTG1,BIRC3,BCL2,BLK,PTK2,AKT3,VAV3
9_Member	WikiPathways	WP51	Regulation of actin cytoskeleton	-3.36404	-1.53674	6/150	71,1072,5747,7114,8395,22800	ACTG1,CFL1,PTK2,TMSB4X,PIP5K1B,RRAS2
9_Member	WikiPathways	WP3929	Chemokine signaling pathway	-3.14601	-1.36849	6/165	2788,4067,5747,10000,10451,653361	GNG7,LYN,PTK2,AKT3,VAV3,NCF1
9_Member	KEGG Pathway	hsa04670	Leukocyte transendothelial migration	-3.06243	-1.29642	5/114	71,399,5747,10451,653361	ACTG1,RHOH,PTK2,VAV3,NCF1
9_Member	GO Biological Processes	GO:0001952	regulation of cell-matrix adhesion	-2.89907	-1.15952	5/124	71,596,5747,8573,8631	ACTG1,BCL2,PTK2,CASK,SKAP1
9_Member	Reactome Gene Sets	R-HSA-5663213	RHO GTPases Activate WASPs and WAVEs	-2.79736	-1.0787	3/36	71,5747,10094	ACTG1,PTK2,ARPC3
9_Member	GO Biological Processes	GO:0061041	regulation of wound healing	-2.70821	-1.00062	5/137	71,240,5581,5747,8573	ACTG1,ALOX5,PRKCE,PTK2,CASK
9_Member	GO Biological Processes	GO:0010810	regulation of cell-substrate adhesion	-2.53139	-0.865463	6/218	71,596,5581,5747,8573,8631	ACTG1,BCL2,PRKCE,PTK2,CASK,SKAP1
9_Member	GO Biological Processes	GO:1903034	regulation of response to wounding	-2.30674	-0.695066	5/170	71,240,5581,5747,8573	ACTG1,ALOX5,PRKCE,PTK2,CASK
9_Member	Reactome Gene Sets	R-HSA-195258	RHO GTPase Effectors	-2.2682	-0.665204	7/327	71,1072,5747,6232,8364,10094,653361	ACTG1,CFL1,PTK2,RPS27,H4C3,ARPC3,NCF1
9_Member	GO Biological Processes	GO:0001944	vasculature development	-2.14167	-0.561492	9/526	71,4208,4643,5747,6850,9451,10451,83478,83943	ACTG1,MEF2C,MYO1E,PTK2,SYK,EIF2AK3,VAV3,ARHGAP24,IMMP2L
9_Member	GO Biological Processes	GO:0090303	positive regulation of wound healing	-2.10714	-0.533588	3/63	71,5581,5747	ACTG1,PRKCE,PTK2
9_Member	Reactome Gene Sets	R-HSA-1500931	Cell-Cell communication	-2.01104	-0.457459	4/129	71,5747,5777,8573	ACTG1,PTK2,PTPN6,CASK
10_Summary	GO Biological Processes	GO:0002431	Fc receptor mediated stimulatory signaling pathway	-8.09952	-5.85182	6/24	640,4067,5581,5747,6850,10451,596,933,3708,10000,29760,5777,8631,23075,240,3566,26228,84433,653361,1072,2788,7114,490,972,5026,29802,80228,157,3122,1378,55024,118788,4208,3394,9451,71,9712,10094,8573,2530,26037,22800,817,55589,57118	BLK,LYN,PRKCE,PTK2,SYK,VAV3,BCL2,CD22,ITPR1,AKT3,BLNK,PTPN6,SKAP1,SWAP70,ALOX5,IL4R,STAP1,CARD11,NCF1,CFL1,GNG7,TMSB4X,ATP2B1,CD74,P2RX5,VPREB3,ORAI2,GRK3,HLA-DRA,CR1,BANK1,PIK3AP1,MEF2C,IRF8,EIF2AK3,ACTG1,USP6NL,ARPC3,CASK,FUT8,SIPA1L1,RRAS2,CAMK2D,BMP2K,CAMK1D
10_Member	GO Biological Processes	GO:0002431	Fc receptor mediated stimulatory signaling pathway	-8.09952	-5.85182	6/24	640,4067,5581,5747,6850,10451	BLK,LYN,PRKCE,PTK2,SYK,VAV3
10_Member	Canonical Pathways	M8626	SIG BCR SIGNALING PATHWAY	-7.75587	-5.53813	7/46	596,933,3708,4067,6850,10000,29760	BCL2,CD22,ITPR1,LYN,SYK,AKT3,BLNK
10_Member	GO Biological Processes	GO:0002433	immune response-regulating cell surface receptor signaling pathway involved in phagocytosis	-6.71107	-4.56982	5/21	4067,5581,5747,6850,10451	LYN,PRKCE,PTK2,SYK,VAV3
10_Member	GO Biological Processes	GO:0038096	Fc-gamma receptor signaling pathway involved in phagocytosis	-6.71107	-4.56982	5/21	4067,5581,5747,6850,10451	LYN,PRKCE,PTK2,SYK,VAV3
10_Member	GO Biological Processes	GO:0033628	regulation of cell adhesion mediated by integrin	-6.19529	-4.07767	6/48	4067,5747,5777,6850,8631,23075	LYN,PTK2,PTPN6,SYK,SKAP1,SWAP70
10_Member	GO Biological Processes	GO:0038094	Fc-gamma receptor signaling pathway	-6.04301	-3.94045	5/28	4067,5581,5747,6850,10451	LYN,PRKCE,PTK2,SYK,VAV3
10_Member	GO Biological Processes	GO:0002532	production of molecular mediator involved in inflammatory response	-5.67109	-3.59486	4/15	240,3566,4067,6850	ALOX5,IL4R,LYN,SYK
10_Member	GO Biological Processes	GO:0033006	regulation of mast cell activation involved in immune response	-5.60461	-3.53984	5/34	640,3566,4067,5777,6850	BLK,IL4R,LYN,PTPN6,SYK
10_Member	GO Biological Processes	GO:0050854	regulation of antigen receptor-mediated signaling pathway	-5.36747	-3.31166	6/66	640,933,4067,5777,26228,84433	BLK,CD22,LYN,PTPN6,STAP1,CARD11
10_Member	WikiPathways	WP3937	Microglia pathogen phagocytosis pathway	-5.2444	-3.19953	5/40	4067,5777,6850,10451,653361	LYN,PTPN6,SYK,VAV3,NCF1
10_Member	Reactome Gene Sets	R-HSA-76002	Platelet activation, signaling and aggregation	-5.06796	-3.03164	10/263	1072,2788,3708,4067,5581,5747,5777,6850,7114,10451	CFL1,GNG7,ITPR1,LYN,PRKCE,PTK2,PTPN6,SYK,TMSB4X,VAV3
10_Member	GO Biological Processes	GO:0033003	regulation of mast cell activation	-4.98695	-2.95903	5/45	640,3566,4067,5777,6850	BLK,IL4R,LYN,PTPN6,SYK
10_Member	Reactome Gene Sets	R-HSA-109582	Hemostasis	-4.88633	-2.86254	15/621	490,972,1072,2788,3708,4067,5026,5581,5747,5777,6850,7114,10451,29802,80228	ATP2B1,CD74,CFL1,GNG7,ITPR1,LYN,P2RX5,PRKCE,PTK2,PTPN6,SYK,TMSB4X,VAV3,VPREB3,ORAI2
10_Member	GO Biological Processes	GO:0050855	regulation of B cell receptor signaling pathway	-4.79952	-2.78389	4/24	640,933,4067,26228	BLK,CD22,LYN,STAP1
10_Member	Canonical Pathways	M17200	SA B CELL RECEPTOR COMPLEXES	-4.79952	-2.78389	4/24	4067,6850,10451,29760	LYN,SYK,VAV3,BLNK
10_Member	GO Biological Processes	GO:0038093	Fc receptor signaling pathway	-4.75915	-2.74877	5/50	4067,5581,5747,6850,10451	LYN,PRKCE,PTK2,SYK,VAV3
10_Member	GO Biological Processes	GO:0002576	platelet degranulation	-4.67133	-2.67351	3/9	640,4067,6850	BLK,LYN,SYK
10_Member	Canonical Pathways	M99	PID TXA2PATHWAY	-4.51674	-2.53602	5/56	157,640,4067,5581,6850	GRK3,BLK,LYN,PRKCE,SYK
10_Member	GO Biological Processes	GO:0002886	regulation of myeloid leukocyte mediated immunity	-4.40603	-2.4327	5/59	640,3566,4067,6850,26228	BLK,IL4R,LYN,SYK,STAP1
10_Member	Canonical Pathways	M124	PID CXCR4 PATHWAY	-4.32804	-2.36557	6/100	640,1072,3122,4067,5747,5777	BLK,CFL1,HLA-DRA,LYN,PTK2,PTPN6
10_Member	GO Biological Processes	GO:0043304	regulation of mast cell degranulation	-4.28753	-2.33039	4/32	640,3566,4067,6850	BLK,IL4R,LYN,SYK
10_Member	Reactome Gene Sets	R-HSA-2871809	FCERI mediated Ca+2 mobilization	-4.23359	-2.28172	4/33	3708,4067,6850,10451	ITPR1,LYN,SYK,VAV3
10_Member	GO Biological Processes	GO:0050869	negative regulation of B cell activation	-4.13089	-2.19106	4/35	640,1378,4067,55024	BLK,CR1,LYN,BANK1
10_Member	Reactome Gene Sets	R-HSA-114604	GPVI-mediated activation cascade	-4.13089	-2.19106	4/35	4067,5777,6850,10451	LYN,PTPN6,SYK,VAV3
10_Member	KEGG Pathway	hsa04664	Fc epsilon RI signaling pathway	-4.1078	-2.17135	5/68	240,4067,6850,10000,10451	ALOX5,LYN,SYK,AKT3,VAV3
10_Member	Canonical Pathways	M1315	SIG PIP3 SIGNALING IN B LYMPHOCYTES	-4.08192	-2.15049	4/36	3708,4067,6850,10000	ITPR1,LYN,SYK,AKT3
10_Member	GO Biological Processes	GO:0034142	toll-like receptor 4 signaling pathway	-3.62988	-1.75163	3/19	4067,5581,118788	LYN,PRKCE,PIK3AP1
10_Member	Canonical Pathways	M141	PID PI3KCI PATHWAY	-3.58909	-1.7239	4/48	640,4067,6850,29760	BLK,LYN,SYK,BLNK
10_Member	Reactome Gene Sets	R-HSA-512988	Interleukin-3, Interleukin-5 and GM-CSF signaling	-3.58909	-1.7239	4/48	4067,5777,6850,29760	LYN,PTPN6,SYK,BLNK
10_Member	GO Biological Processes	GO:0043300	regulation of leukocyte degranulation	-3.55428	-1.69823	4/49	640,3566,4067,6850	BLK,IL4R,LYN,SYK
10_Member	GO Biological Processes	GO:0002902	regulation of B cell apoptotic process	-3.49646	-1.65082	3/21	640,972,4067	BLK,CD74,LYN
10_Member	Reactome Gene Sets	R-HSA-912631	Regulation of signaling by CBL	-3.43485	-1.59866	3/22	4067,6850,29760	LYN,SYK,BLNK
10_Member	GO Biological Processes	GO:0038095	Fc-epsilon receptor signaling pathway	-3.32026	-1.50749	3/24	4067,6850,10451	LYN,SYK,VAV3
10_Member	GO Biological Processes	GO:2000108	positive regulation of leukocyte apoptotic process	-3.1665	-1.38663	3/27	640,4067,4208	BLK,LYN,MEF2C
10_Member	GO Biological Processes	GO:0090330	regulation of platelet aggregation	-3.07396	-1.30338	3/29	640,4067,6850	BLK,LYN,SYK
10_Member	GO Biological Processes	GO:0071216	cellular response to biotic stimulus	-3.02808	-1.26884	7/239	3394,4067,4208,5581,6850,9451,26228	IRF8,LYN,MEF2C,PRKCE,SYK,EIF2AK3,STAP1
10_Member	GO Biological Processes	GO:0002366	leukocyte activation involved in immune response	-2.95024	-1.19766	6/180	972,3394,4067,5581,6850,23075	CD74,IRF8,LYN,PRKCE,SYK,SWAP70
10_Member	Canonical Pathways	M275	PID ALPHA SYNUCLEIN PATHWAY	-2.94739	-1.19715	3/32	640,4067,6850	BLK,LYN,SYK
10_Member	Reactome Gene Sets	R-HSA-2871796	FCERI mediated MAPK activation	-2.94739	-1.19715	3/32	4067,6850,10451	LYN,SYK,VAV3
10_Member	GO Biological Processes	GO:0043552	positive regulation of phosphatidylinositol 3-kinase activity	-2.90805	-1.16528	3/33	4067,5747,10451	LYN,PTK2,VAV3
10_Member	GO Biological Processes	GO:0002263	cell activation involved in immune response	-2.90131	-1.15962	6/184	972,3394,4067,5581,6850,23075	CD74,IRF8,LYN,PRKCE,SYK,SWAP70
10_Member	KEGG Pathway	hsa04611	Platelet activation	-2.89907	-1.15952	5/124	71,3708,4067,6850,10000	ACTG1,ITPR1,LYN,SYK,AKT3
10_Member	Canonical Pathways	M177	PID EPHA FWDPATHWAY	-2.86998	-1.13575	3/34	640,4067,10451	BLK,LYN,VAV3
10_Member	GO Biological Processes	GO:0097028	dendritic cell differentiation	-2.83311	-1.10517	3/35	640,3394,4067	BLK,IRF8,LYN
10_Member	Canonical Pathways	M186	PID PDGFRB PATHWAY	-2.82301	-1.09716	5/129	640,4067,5581,9712,10094	BLK,LYN,PRKCE,USP6NL,ARPC3
10_Member	GO Biological Processes	GO:0034110	regulation of homotypic cell-cell adhesion	-2.79736	-1.0787	3/36	640,4067,6850	BLK,LYN,SYK
10_Member	Canonical Pathways	M22	PID GMCSF PATHWAY	-2.79736	-1.0787	3/36	3394,4067,6850	IRF8,LYN,SYK
10_Member	GO Biological Processes	GO:0090218	positive regulation of lipid kinase activity	-2.76269	-1.04707	3/37	4067,5747,10451	LYN,PTK2,VAV3
10_Member	Reactome Gene Sets	R-HSA-2454202	Fc epsilon receptor (FCERI) signaling	-2.75032	-1.03571	5/134	3708,4067,6850,10451,84433	ITPR1,LYN,SYK,VAV3,CARD11
10_Member	GO Biological Processes	GO:0050848	regulation of calcium-mediated signaling	-2.7286	-1.02001	4/81	933,3708,5026,6850	CD22,ITPR1,P2RX5,SYK
10_Member	GO Biological Processes	GO:1903305	regulation of regulated secretory pathway	-2.66717	-0.973466	5/140	640,3566,4067,6850,8573	BLK,IL4R,LYN,SYK,CASK
10_Member	Reactome Gene Sets	R-HSA-9664323	FCGR3A-mediated IL10 synthesis	-2.66448	-0.973466	3/40	3708,4067,6850	ITPR1,LYN,SYK
10_Member	GO Biological Processes	GO:2000106	regulation of leukocyte apoptotic process	-2.65194	-0.962831	4/85	640,972,4067,4208	BLK,CD74,LYN,MEF2C
10_Member	GO Biological Processes	GO:0018108	peptidyl-tyrosine phosphorylation	-2.58812	-0.911221	5/146	640,4067,5747,5777,6850	BLK,LYN,PTK2,PTPN6,SYK
10_Member	GO Biological Processes	GO:0018212	peptidyl-tyrosine modification	-2.55002	-0.878647	5/149	640,4067,5747,5777,6850	BLK,LYN,PTK2,PTPN6,SYK
10_Member	GO Biological Processes	GO:0007229	integrin-mediated signaling pathway	-2.51022	-0.854994	4/93	2530,5747,6850,10451	FUT8,PTK2,SYK,VAV3
10_Member	GO Biological Processes	GO:0045834	positive regulation of lipid metabolic process	-2.46458	-0.821398	5/156	972,4067,5581,5747,10451	CD74,LYN,PRKCE,PTK2,VAV3
10_Member	GO Biological Processes	GO:0010543	regulation of platelet activation	-2.38738	-0.75531	3/50	640,4067,6850	BLK,LYN,SYK
10_Member	GO Biological Processes	GO:0048013	ephrin receptor signaling pathway	-2.38738	-0.75531	3/50	4067,5747,26037	LYN,PTK2,SIPA1L1
10_Member	Reactome Gene Sets	R-HSA-3928665	EPH-ephrin mediated repulsion of cells	-2.36309	-0.736825	3/51	71,4067,10451	ACTG1,LYN,VAV3
10_Member	KEGG Pathway	hsa04625	C-type lectin receptor signaling pathway	-2.33665	-0.716929	4/104	3708,6850,10000,22800	ITPR1,SYK,AKT3,RRAS2
10_Member	WikiPathways	WP2018	RANKL/RANK signaling pathway	-2.27093	-0.667149	3/55	4067,5747,6850	LYN,PTK2,SYK
10_Member	GO Biological Processes	GO:0002275	myeloid cell activation involved in immune response	-2.24905	-0.652256	3/56	4067,5581,6850	LYN,PRKCE,SYK
10_Member	GO Biological Processes	GO:0043551	regulation of phosphatidylinositol 3-kinase activity	-2.2276	-0.633111	3/57	4067,5747,10451	LYN,PTK2,VAV3
10_Member	GO Biological Processes	GO:0070228	regulation of lymphocyte apoptotic process	-2.2276	-0.633111	3/57	640,972,4067	BLK,CD74,LYN
10_Member	GO Biological Processes	GO:0002224	toll-like receptor signaling pathway	-2.20657	-0.61513	3/58	4067,5581,118788	LYN,PRKCE,PIK3AP1
10_Member	Canonical Pathways	M7	PID FCER1 PATHWAY	-2.16569	-0.581791	3/60	4067,5747,6850	LYN,PTK2,SYK
10_Member	GO Biological Processes	GO:0046777	protein autophosphorylation	-2.13511	-0.555674	5/187	817,4067,5747,6850,9451	CAMK2D,LYN,PTK2,SYK,EIF2AK3
10_Member	GO Biological Processes	GO:0060627	regulation of vesicle-mediated transport	-2.09598	-0.524611	9/535	640,933,3566,4067,6850,8573,26228,55589,57118	BLK,CD22,IL4R,LYN,SYK,CASK,STAP1,BMP2K,CAMK1D
10_Member	KEGG Pathway	hsa05167	Kaposi sarcoma-associated herpesvirus infection	-2.06995	-0.504943	5/194	2788,3708,4067,6850,10000	GNG7,ITPR1,LYN,SYK,AKT3
10_Member	Canonical Pathways	M15	PID LYSOPHOSPHOLIPID PATHWAY	-2.06983	-0.504943	3/65	4067,5581,5747	LYN,PRKCE,PTK2
10_Member	GO Biological Processes	GO:0071222	cellular response to lipopolysaccharide	-2.01639	-0.461406	5/200	3394,4067,4208,5581,26228	IRF8,LYN,MEF2C,PRKCE,STAP1
11_Summary	GO Biological Processes	GO:0002699	positive regulation of immune effector process	-8.03004	-5.78918	13/249	640,972,1378,2208,3109,3122,3123,3566,4067,5777,6850,8417,26228,933,653361,399,9308,22806,84433,4208,8364,8631,3127,3708	BLK,CD74,CR1,FCER2,HLA-DMB,HLA-DRA,HLA-DRB1,IL4R,LYN,PTPN6,SYK,STX7,STAP1,CD22,NCF1,RHOH,CD83,IKZF3,CARD11,MEF2C,H4C3,SKAP1,HLA-DRB5,ITPR1
11_Member	GO Biological Processes	GO:0002699	positive regulation of immune effector process	-8.03004	-5.78918	13/249	640,972,1378,2208,3109,3122,3123,3566,4067,5777,6850,8417,26228	BLK,CD74,CR1,FCER2,HLA-DMB,HLA-DRA,HLA-DRB1,IL4R,LYN,PTPN6,SYK,STX7,STAP1
11_Member	GO Biological Processes	GO:0002697	regulation of immune effector process	-7.92362	-5.68949	15/356	640,933,972,1378,2208,3109,3122,3123,3566,4067,5777,6850,8417,26228,653361	BLK,CD22,CD74,CR1,FCER2,HLA-DMB,HLA-DRA,HLA-DRB1,IL4R,LYN,PTPN6,SYK,STX7,STAP1,NCF1
11_Member	GO Biological Processes	GO:0045619	regulation of lymphocyte differentiation	-7.06297	-4.88809	11/202	399,972,1378,3122,3123,3566,5777,6850,9308,22806,84433	RHOH,CD74,CR1,HLA-DRA,HLA-DRB1,IL4R,PTPN6,SYK,CD83,IKZF3,CARD11
11_Member	GO Biological Processes	GO:1903706	regulation of hemopoiesis	-6.44557	-4.31761	14/400	399,972,1378,3122,3123,3566,4067,4208,5777,6850,8364,9308,22806,84433	RHOH,CD74,CR1,HLA-DRA,HLA-DRB1,IL4R,LYN,MEF2C,PTPN6,SYK,H4C3,CD83,IKZF3,CARD11
11_Member	GO Biological Processes	GO:0002703	regulation of leukocyte mediated immunity	-6.38428	-4.26151	11/236	640,1378,2208,3122,3123,3566,4067,5777,6850,8417,26228	BLK,CR1,FCER2,HLA-DRA,HLA-DRB1,IL4R,LYN,PTPN6,SYK,STX7,STAP1
11_Member	GO Biological Processes	GO:0045582	positive regulation of T cell differentiation	-6.14136	-4.02628	8/113	399,972,1378,3122,3123,3566,6850,9308	RHOH,CD74,CR1,HLA-DRA,HLA-DRB1,IL4R,SYK,CD83
11_Member	GO Biological Processes	GO:1902105	regulation of leukocyte differentiation	-6.11451	-4.00197	12/306	399,972,1378,3122,3123,3566,4067,5777,6850,9308,22806,84433	RHOH,CD74,CR1,HLA-DRA,HLA-DRB1,IL4R,LYN,PTPN6,SYK,CD83,IKZF3,CARD11
11_Member	GO Biological Processes	GO:0045621	positive regulation of lymphocyte differentiation	-5.78228	-3.68949	8/126	399,972,1378,3122,3123,3566,6850,9308	RHOH,CD74,CR1,HLA-DRA,HLA-DRB1,IL4R,SYK,CD83
11_Member	GO Biological Processes	GO:0045580	regulation of T cell differentiation	-5.73389	-3.64488	9/172	399,972,1378,3122,3123,3566,6850,9308,84433	RHOH,CD74,CR1,HLA-DRA,HLA-DRB1,IL4R,SYK,CD83,CARD11
11_Member	GO Biological Processes	GO:0031343	positive regulation of cell killing	-5.40656	-3.34852	6/65	2208,3122,3123,6850,8417,26228	FCER2,HLA-DRA,HLA-DRB1,SYK,STX7,STAP1
11_Member	GO Biological Processes	GO:0002819	regulation of adaptive immune response	-5.34194	-3.29054	9/192	1378,2208,3122,3123,3566,4208,5777,8417,8631	CR1,FCER2,HLA-DRA,HLA-DRB1,IL4R,MEF2C,PTPN6,STX7,SKAP1
11_Member	GO Biological Processes	GO:0046638	positive regulation of alpha-beta T cell differentiation	-4.75915	-2.74877	5/50	3122,3123,3566,6850,9308	HLA-DRA,HLA-DRB1,IL4R,SYK,CD83
11_Member	GO Biological Processes	GO:0002822	regulation of adaptive immune response based on somatic recombination of immune receptors built from immunoglobulin superfamily domains	-4.69353	-2.69376	8/177	1378,2208,3122,3123,3566,4208,5777,8417	CR1,FCER2,HLA-DRA,HLA-DRB1,IL4R,MEF2C,PTPN6,STX7
11_Member	GO Biological Processes	GO:1902107	positive regulation of leukocyte differentiation	-4.69353	-2.69376	8/177	399,972,1378,3122,3123,3566,6850,9308	RHOH,CD74,CR1,HLA-DRA,HLA-DRB1,IL4R,SYK,CD83
11_Member	GO Biological Processes	GO:1903708	positive regulation of hemopoiesis	-4.69353	-2.69376	8/177	399,972,1378,3122,3123,3566,6850,9308	RHOH,CD74,CR1,HLA-DRA,HLA-DRB1,IL4R,SYK,CD83
11_Member	GO Biological Processes	GO:0031341	regulation of cell killing	-4.32804	-2.36557	6/100	2208,3122,3123,6850,8417,26228	FCER2,HLA-DRA,HLA-DRB1,SYK,STX7,STAP1
11_Member	GO Biological Processes	GO:0043372	positive regulation of CD4-positive, alpha-beta T cell differentiation	-4.28753	-2.33039	4/32	3122,3123,3566,9308	HLA-DRA,HLA-DRB1,IL4R,CD83
11_Member	GO Biological Processes	GO:0046635	positive regulation of alpha-beta T cell activation	-4.1078	-2.17135	5/68	3122,3123,3566,6850,9308	HLA-DRA,HLA-DRB1,IL4R,SYK,CD83
11_Member	GO Biological Processes	GO:0046637	regulation of alpha-beta T cell differentiation	-4.07739	-2.14762	5/69	3122,3123,3566,6850,9308	HLA-DRA,HLA-DRB1,IL4R,SYK,CD83
11_Member	GO Biological Processes	GO:2000516	positive regulation of CD4-positive, alpha-beta T cell activation	-3.98828	-2.06834	4/38	3122,3123,3566,9308	HLA-DRA,HLA-DRB1,IL4R,CD83
11_Member	GO Biological Processes	GO:0045591	positive regulation of regulatory T cell differentiation	-3.49646	-1.65082	3/21	1378,3122,3123	CR1,HLA-DRA,HLA-DRB1
11_Member	WikiPathways	WP4884	Pathogenesis of SARS-CoV-2 mediated by nsp9-nsp10 complex	-3.49646	-1.65082	3/21	3122,3123,3127	HLA-DRA,HLA-DRB1,HLA-DRB5
11_Member	GO Biological Processes	GO:0043370	regulation of CD4-positive, alpha-beta T cell differentiation	-3.45435	-1.61682	4/52	3122,3123,3566,9308	HLA-DRA,HLA-DRB1,IL4R,CD83
11_Member	GO Biological Processes	GO:0001912	positive regulation of leukocyte mediated cytotoxicity	-3.27226	-1.46452	4/58	3122,3123,8417,26228	HLA-DRA,HLA-DRB1,STX7,STAP1
11_Member	GO Biological Processes	GO:0019883	antigen processing and presentation of endogenous antigen	-3.2668	-1.4628	3/25	972,3122,3123	CD74,HLA-DRA,HLA-DRB1
11_Member	GO Biological Processes	GO:0046634	regulation of alpha-beta T cell activation	-3.18692	-1.39995	5/107	3122,3123,3566,6850,9308	HLA-DRA,HLA-DRB1,IL4R,SYK,CD83
11_Member	GO Biological Processes	GO:0001916	positive regulation of T cell mediated cytotoxicity	-3.03025	-1.26989	3/30	3122,3123,8417	HLA-DRA,HLA-DRB1,STX7
11_Member	GO Biological Processes	GO:0002706	regulation of lymphocyte mediated immunity	-3.01327	-1.25596	6/175	1378,2208,3122,3123,5777,8417	CR1,FCER2,HLA-DRA,HLA-DRB1,PTPN6,STX7
11_Member	GO Biological Processes	GO:0002821	positive regulation of adaptive immune response	-3.01174	-1.25596	5/117	2208,3122,3123,8417,8631	FCER2,HLA-DRA,HLA-DRB1,STX7,SKAP1
11_Member	GO Biological Processes	GO:2000514	regulation of CD4-positive, alpha-beta T cell activation	-3.01074	-1.25596	4/68	3122,3123,3566,9308	HLA-DRA,HLA-DRB1,IL4R,CD83
11_Member	GO Biological Processes	GO:0002862	negative regulation of inflammatory response to antigenic stimulus	-2.9881	-1.23442	3/31	3123,4067,6850	HLA-DRB1,LYN,SYK
11_Member	GO Biological Processes	GO:0032673	regulation of interleukin-4 production	-2.90805	-1.16528	3/33	3123,6850,9308	HLA-DRB1,SYK,CD83
11_Member	GO Biological Processes	GO:0045589	regulation of regulatory T cell differentiation	-2.86998	-1.13575	3/34	1378,3122,3123	CR1,HLA-DRA,HLA-DRB1
11_Member	GO Biological Processes	GO:0002705	positive regulation of leukocyte mediated immunity	-2.69441	-0.988805	5/138	2208,3122,3123,8417,26228	FCER2,HLA-DRA,HLA-DRB1,STX7,STAP1
11_Member	GO Biological Processes	GO:0001914	regulation of T cell mediated cytotoxicity	-2.66448	-0.973466	3/40	3122,3123,8417	HLA-DRA,HLA-DRB1,STX7
11_Member	GO Biological Processes	GO:0045622	regulation of T-helper cell differentiation	-2.66448	-0.973466	3/40	3122,3123,3566	HLA-DRA,HLA-DRB1,IL4R
11_Member	GO Biological Processes	GO:0001910	regulation of leukocyte mediated cytotoxicity	-2.65194	-0.962831	4/85	3122,3123,8417,26228	HLA-DRA,HLA-DRB1,STX7,STAP1
11_Member	WikiPathways	WP5098	T-cell activation SARS-CoV-2	-2.61513	-0.932635	4/87	3122,3123,3708,84433	HLA-DRA,HLA-DRB1,ITPR1,CARD11
11_Member	GO Biological Processes	GO:0002861	regulation of inflammatory response to antigenic stimulus	-2.51746	-0.85781	3/45	3123,4067,6850	HLA-DRB1,LYN,SYK
11_Member	GO Biological Processes	GO:0002824	positive regulation of adaptive immune response based on somatic recombination of immune receptors built from immunoglobulin superfamily domains	-2.22326	-0.631059	4/112	2208,3122,3123,8417	FCER2,HLA-DRA,HLA-DRB1,STX7
11_Member	GO Biological Processes	GO:0002711	positive regulation of T cell mediated immunity	-2.18593	-0.597529	3/59	3122,3123,8417	HLA-DRA,HLA-DRB1,STX7
11_Member	GO Biological Processes	GO:0002708	positive regulation of lymphocyte mediated immunity	-2.15709	-0.574687	4/117	2208,3122,3123,8417	FCER2,HLA-DRA,HLA-DRB1,STX7
11_Member	GO Biological Processes	GO:0032653	regulation of interleukin-10 production	-2.10714	-0.533588	3/63	3123,6850,9308	HLA-DRB1,SYK,CD83
12_Summary	KEGG Pathway	hsa04666	Fc gamma R-mediated phagocytosis	-7.8669	-5.6394	9/97	1072,4067,5581,6850,8395,10000,10094,10451,653361	CFL1,LYN,PRKCE,SYK,PIP5K1B,AKT3,ARPC3,VAV3,NCF1
12_Member	KEGG Pathway	hsa04666	Fc gamma R-mediated phagocytosis	-7.8669	-5.6394	9/97	1072,4067,5581,6850,8395,10000,10094,10451,653361	CFL1,LYN,PRKCE,SYK,PIP5K1B,AKT3,ARPC3,VAV3,NCF1
12_Member	Canonical Pathways	M278	PID RAC1 PATHWAY	-3.39119	-1.55899	4/54	1072,8395,10094,653361	CFL1,PIP5K1B,ARPC3,NCF1
13_Summary	GO Biological Processes	GO:0006468	protein phosphorylation	-6.78434	-4.63217	19/704	157,596,640,817,1456,4067,4261,5218,5581,5747,5777,6850,7204,7405,8573,9451,10000,55589,57118,22806,3708,3123,3566,4946,5026,8417	GRK3,BCL2,BLK,CAMK2D,CSNK1G3,LYN,CIITA,CDK14,PRKCE,PTK2,PTPN6,SYK,TRIO,UVRAG,CASK,EIF2AK3,AKT3,BMP2K,CAMK1D,IKZF3,ITPR1,HLA-DRB1,IL4R,OAZ1,P2RX5,STX7
13_Member	GO Biological Processes	GO:0006468	protein phosphorylation	-6.78434	-4.63217	19/704	157,596,640,817,1456,4067,4261,5218,5581,5747,5777,6850,7204,7405,8573,9451,10000,55589,57118	GRK3,BCL2,BLK,CAMK2D,CSNK1G3,LYN,CIITA,CDK14,PRKCE,PTK2,PTPN6,SYK,TRIO,UVRAG,CASK,EIF2AK3,AKT3,BMP2K,CAMK1D
13_Member	GO Biological Processes	GO:0018105	peptidyl-serine phosphorylation	-4.58959	-2.59976	8/183	596,817,1456,5581,6850,9451,10000,57118	BCL2,CAMK2D,CSNK1G3,PRKCE,SYK,EIF2AK3,AKT3,CAMK1D
13_Member	GO Biological Processes	GO:0018209	peptidyl-serine modification	-4.22503	-2.27489	8/206	596,817,1456,5581,6850,9451,10000,57118	BCL2,CAMK2D,CSNK1G3,PRKCE,SYK,EIF2AK3,AKT3,CAMK1D
13_Member	Canonical Pathways	M122	PID IL2 1PATHWAY	-3.36057	-1.53674	4/55	596,5581,6850,22806	BCL2,PRKCE,SYK,IKZF3
13_Member	Reactome Gene Sets	R-HSA-2029485	Role of phospholipids in phagocytosis	-3.2668	-1.4628	3/25	3708,5581,6850	ITPR1,PRKCE,SYK
13_Member	GO Biological Processes	GO:0060341	regulation of cellular localization	-2.53537	-0.868543	12/733	596,640,817,3123,3566,4067,4946,5026,5581,6850,8417,9451	BCL2,BLK,CAMK2D,HLA-DRB1,IL4R,LYN,OAZ1,P2RX5,PRKCE,SYK,STX7,EIF2AK3
14_Summary	WikiPathways	WP3888	VEGFA-VEGFR2 signaling pathway	-6.73501	-4.5856	15/439	71,596,1072,4208,4673,5581,5747,5777,7114,9168,9451,9734,23521,445815,653361	ACTG1,BCL2,CFL1,MEF2C,NAP1L1,PRKCE,PTK2,PTPN6,TMSB4X,TMSB10,EIF2AK3,HDAC9,RPL13A,PALM2AKAP2,NCF1
14_Member	WikiPathways	WP3888	VEGFA-VEGFR2 signaling pathway	-6.73501	-4.5856	15/439	71,596,1072,4208,4673,5581,5747,5777,7114,9168,9451,9734,23521,445815,653361	ACTG1,BCL2,CFL1,MEF2C,NAP1L1,PRKCE,PTK2,PTPN6,TMSB4X,TMSB10,EIF2AK3,HDAC9,RPL13A,PALM2AKAP2,NCF1
15_Summary	GO Biological Processes	GO:0002683	negative regulation of immune system process	-6.07158	-3.96406	14/430	640,933,972,1378,3112,3123,3566,4067,5777,6850,26228,54625,55024,57162,5747,23075,8573,2208,490,7114,9308,9734	BLK,CD22,CD74,CR1,HLA-DOB,HLA-DRB1,IL4R,LYN,PTPN6,SYK,STAP1,PARP14,BANK1,PELI1,PTK2,SWAP70,CASK,FCER2,ATP2B1,TMSB4X,CD83,HDAC9
15_Member	GO Biological Processes	GO:0002683	negative regulation of immune system process	-6.07158	-3.96406	14/430	640,933,972,1378,3112,3123,3566,4067,5777,6850,26228,54625,55024,57162	BLK,CD22,CD74,CR1,HLA-DOB,HLA-DRB1,IL4R,LYN,PTPN6,SYK,STAP1,PARP14,BANK1,PELI1
15_Member	GO Biological Processes	GO:0051250	negative regulation of lymphocyte activation	-5.97235	-3.87225	9/161	640,972,1378,3123,3566,4067,5777,55024,57162	BLK,CD74,CR1,HLA-DRB1,IL4R,LYN,PTPN6,BANK1,PELI1
15_Member	GO Biological Processes	GO:0002695	negative regulation of leukocyte activation	-5.32359	-3.27437	9/193	640,972,1378,3123,3566,4067,5777,55024,57162	BLK,CD74,CR1,HLA-DRB1,IL4R,LYN,PTPN6,BANK1,PELI1
15_Member	GO Biological Processes	GO:0050866	negative regulation of cell activation	-4.92955	-2.9037	9/216	640,972,1378,3123,3566,4067,5777,55024,57162	BLK,CD74,CR1,HLA-DRB1,IL4R,LYN,PTPN6,BANK1,PELI1
15_Member	GO Biological Processes	GO:0050672	negative regulation of lymphocyte proliferation	-4.75838	-2.74877	6/84	640,1378,3123,4067,5777,57162	BLK,CR1,HLA-DRB1,LYN,PTPN6,PELI1
15_Member	GO Biological Processes	GO:0032945	negative regulation of mononuclear cell proliferation	-4.7289	-2.72127	6/85	640,1378,3123,4067,5777,57162	BLK,CR1,HLA-DRB1,LYN,PTPN6,PELI1
15_Member	GO Biological Processes	GO:0070664	negative regulation of leukocyte proliferation	-4.55974	-2.57339	6/91	640,1378,3123,4067,5777,57162	BLK,CR1,HLA-DRB1,LYN,PTPN6,PELI1
15_Member	GO Biological Processes	GO:0022408	negative regulation of cell-cell adhesion	-4.33072	-2.36557	8/199	972,1378,3123,3566,5747,5777,23075,57162	CD74,CR1,HLA-DRB1,IL4R,PTK2,PTPN6,SWAP70,PELI1
15_Member	GO Biological Processes	GO:0050868	negative regulation of T cell activation	-3.79065	-1.88818	6/125	972,1378,3123,3566,5777,57162	CD74,CR1,HLA-DRB1,IL4R,PTPN6,PELI1
15_Member	GO Biological Processes	GO:0007162	negative regulation of cell adhesion	-3.7713	-1.87348	9/305	972,1378,3123,3566,5747,5777,8573,23075,57162	CD74,CR1,HLA-DRB1,IL4R,PTK2,PTPN6,CASK,SWAP70,PELI1
15_Member	GO Biological Processes	GO:0002923	regulation of humoral immune response mediated by circulating immunoglobulin	-3.70246	-1.81227	3/18	1378,2208,5777	CR1,FCER2,PTPN6
15_Member	GO Biological Processes	GO:1903038	negative regulation of leukocyte cell-cell adhesion	-3.45851	-1.61694	6/144	972,1378,3123,3566,5777,57162	CD74,CR1,HLA-DRB1,IL4R,PTPN6,PELI1
15_Member	Canonical Pathways	M28	PID IL4 2PATHWAY	-3.10988	-1.33815	4/64	2208,3566,5777,54625	FCER2,IL4R,PTPN6,PARP14
15_Member	GO Biological Processes	GO:0042130	negative regulation of T cell proliferation	-3.01074	-1.25596	4/68	1378,3123,5777,57162	CR1,HLA-DRB1,PTPN6,PELI1
15_Member	GO Biological Processes	GO:0001818	negative regulation of cytokine production	-2.57084	-0.898551	8/367	490,1378,3123,5777,7114,9308,9734,55024	ATP2B1,CR1,HLA-DRB1,PTPN6,TMSB4X,CD83,HDAC9,BANK1
15_Member	GO Biological Processes	GO:0002920	regulation of humoral immune response	-2.51746	-0.85781	3/45	1378,2208,5777	CR1,FCER2,PTPN6
15_Member	GO Biological Processes	GO:1902106	negative regulation of leukocyte differentiation	-2.35153	-0.726916	4/103	972,1378,3566,4067	CD74,CR1,IL4R,LYN
15_Member	GO Biological Processes	GO:0002823	negative regulation of adaptive immune response based on somatic recombination of immune receptors built from immunoglobulin superfamily domains	-2.29325	-0.684473	3/54	1378,3566,5777	CR1,IL4R,PTPN6
15_Member	GO Biological Processes	GO:1903707	negative regulation of hemopoiesis	-2.29297	-0.684473	4/107	972,1378,3566,4067	CD74,CR1,IL4R,LYN
15_Member	GO Biological Processes	GO:0045620	negative regulation of lymphocyte differentiation	-2.27093	-0.667149	3/55	972,1378,3566	CD74,CR1,IL4R
15_Member	GO Biological Processes	GO:0002698	negative regulation of immune effector process	-2.22326	-0.631059	4/112	933,1378,3566,5777	CD22,CR1,IL4R,PTPN6
15_Member	GO Biological Processes	GO:0002820	negative regulation of adaptive immune response	-2.18593	-0.597529	3/59	1378,3566,5777	CR1,IL4R,PTPN6
15_Member	GO Biological Processes	GO:0002712	regulation of B cell mediated immunity	-2.1263	-0.549819	3/62	1378,2208,5777	CR1,FCER2,PTPN6
15_Member	GO Biological Processes	GO:0002889	regulation of immunoglobulin mediated immune response	-2.1263	-0.549819	3/62	1378,2208,5777	CR1,FCER2,PTPN6
15_Member	GO Biological Processes	GO:0043030	regulation of macrophage activation	-2.1263	-0.549819	3/62	972,3566,26228	CD74,IL4R,STAP1
16_Summary	GO Biological Processes	GO:0045577	regulation of B cell differentiation	-5.81204	-3.71683	5/31	1378,5777,6850,22806,84433,71,3122,3123,3127,8631,5581,4067,10000,10451,399	CR1,PTPN6,SYK,IKZF3,CARD11,ACTG1,HLA-DRA,HLA-DRB1,HLA-DRB5,SKAP1,PRKCE,LYN,AKT3,VAV3,RHOH
16_Member	GO Biological Processes	GO:0045577	regulation of B cell differentiation	-5.81204	-3.71683	5/31	1378,5777,6850,22806,84433	CR1,PTPN6,SYK,IKZF3,CARD11
16_Member	WikiPathways	WP5115	Network map of SARS-CoV-2 signaling pathway	-3.22746	-1.43448	7/221	71,3122,3123,3127,5777,8631,84433	ACTG1,HLA-DRA,HLA-DRB1,HLA-DRB5,PTPN6,SKAP1,CARD11
16_Member	Canonical Pathways	M34	PID TCR PATHWAY	-3.10988	-1.33815	4/64	3122,5581,5777,84433	HLA-DRA,PRKCE,PTPN6,CARD11
16_Member	GO Biological Processes	GO:0031295	T cell costimulation	-2.63352	-0.94821	3/41	4067,5777,84433	LYN,PTPN6,CARD11
16_Member	GO Biological Processes	GO:0031294	lymphocyte costimulation	-2.57401	-0.900803	3/43	4067,5777,84433	LYN,PTPN6,CARD11
16_Member	KEGG Pathway	hsa04660	T cell receptor signaling pathway	-2.33665	-0.716929	4/104	5777,10000,10451,84433	PTPN6,AKT3,VAV3,CARD11
16_Member	Canonical Pathways	M88	PID CD8 TCR PATHWAY	-2.31604	-0.70197	3/53	5581,5777,84433	PRKCE,PTPN6,CARD11
16_Member	WikiPathways	WP5072	Modulators of TCR signaling and T cell activation	-2.14581	-0.564898	3/61	399,5777,84433	RHOH,PTPN6,CARD11
17_Summary	GO Biological Processes	GO:0030029	actin filament-based process	-5.71321	-3.62996	16/601	71,399,596,817,1072,4205,4643,7114,9168,9788,10094,23075,26037,26053,55114,57553,5144,5581,9873,26228,5747,6850,8115,8631,23521,10000,10451,2823,490	ACTG1,RHOH,BCL2,CAMK2D,CFL1,MEF2A,MYO1E,TMSB4X,TMSB10,MTSS1,ARPC3,SWAP70,SIPA1L1,AUTS2,ARHGAP17,MICAL3,PDE4D,PRKCE,FCHSD2,STAP1,PTK2,SYK,TCL1A,SKAP1,RPL13A,AKT3,VAV3,GPM6A,ATP2B1
17_Member	GO Biological Processes	GO:0030029	actin filament-based process	-5.71321	-3.62996	16/601	71,399,596,817,1072,4205,4643,7114,9168,9788,10094,23075,26037,26053,55114,57553	ACTG1,RHOH,BCL2,CAMK2D,CFL1,MEF2A,MYO1E,TMSB4X,TMSB10,MTSS1,ARPC3,SWAP70,SIPA1L1,AUTS2,ARHGAP17,MICAL3
17_Member	GO Biological Processes	GO:0032970	regulation of actin filament-based process	-5.67896	-3.59806	13/399	71,399,817,5144,5581,7114,9168,9788,9873,10094,23075,26228,55114	ACTG1,RHOH,CAMK2D,PDE4D,PRKCE,TMSB4X,TMSB10,MTSS1,FCHSD2,ARPC3,SWAP70,STAP1,ARHGAP17
17_Member	GO Biological Processes	GO:0030036	actin cytoskeleton organization	-5.63104	-3.564	15/538	71,399,596,1072,4205,4643,7114,9168,9788,10094,23075,26037,26053,55114,57553	ACTG1,RHOH,BCL2,CFL1,MEF2A,MYO1E,TMSB4X,TMSB10,MTSS1,ARPC3,SWAP70,SIPA1L1,AUTS2,ARHGAP17,MICAL3
17_Member	GO Biological Processes	GO:0007015	actin filament organization	-5.01086	-2.97876	10/267	399,596,1072,4643,7114,9168,10094,23075,55114,57553	RHOH,BCL2,CFL1,MYO1E,TMSB4X,TMSB10,ARPC3,SWAP70,ARHGAP17,MICAL3
17_Member	GO Biological Processes	GO:0032956	regulation of actin cytoskeleton organization	-4.65231	-2.65643	11/358	71,399,5581,7114,9168,9788,9873,10094,23075,26228,55114	ACTG1,RHOH,PRKCE,TMSB4X,TMSB10,MTSS1,FCHSD2,ARPC3,SWAP70,STAP1,ARHGAP17
17_Member	GO Biological Processes	GO:0051493	regulation of cytoskeleton organization	-3.7449	-1.85015	12/531	71,399,5581,5747,7114,9168,9788,9873,10094,23075,26228,55114	ACTG1,RHOH,PRKCE,PTK2,TMSB4X,TMSB10,MTSS1,FCHSD2,ARPC3,SWAP70,STAP1,ARHGAP17
17_Member	GO Biological Processes	GO:0097435	supramolecular fiber organization	-3.61274	-1.73889	12/549	71,399,596,1072,4205,4643,7114,9168,10094,23075,55114,57553	ACTG1,RHOH,BCL2,CFL1,MEF2A,MYO1E,TMSB4X,TMSB10,ARPC3,SWAP70,ARHGAP17,MICAL3
17_Member	GO Biological Processes	GO:0110053	regulation of actin filament organization	-3.35847	-1.53674	8/276	71,5581,7114,9168,9788,9873,10094,23075	ACTG1,PRKCE,TMSB4X,TMSB10,MTSS1,FCHSD2,ARPC3,SWAP70
17_Member	GO Biological Processes	GO:0008064	regulation of actin polymerization or depolymerization	-3.24473	-1.44775	6/158	5581,7114,9168,9873,10094,23075	PRKCE,TMSB4X,TMSB10,FCHSD2,ARPC3,SWAP70
17_Member	GO Biological Processes	GO:0030832	regulation of actin filament length	-3.23032	-1.43613	6/159	5581,7114,9168,9873,10094,23075	PRKCE,TMSB4X,TMSB10,FCHSD2,ARPC3,SWAP70
17_Member	GO Biological Processes	GO:0043254	regulation of protein-containing complex assembly	-2.87247	-1.13575	9/407	5581,6850,7114,8115,8631,9168,9873,10094,23521	PRKCE,SYK,TMSB4X,TCL1A,SKAP1,TMSB10,FCHSD2,ARPC3,RPL13A
17_Member	GO Biological Processes	GO:0030833	regulation of actin filament polymerization	-2.68073	-0.979066	5/139	5581,7114,9168,9873,10094	PRKCE,TMSB4X,TMSB10,FCHSD2,ARPC3
17_Member	GO Biological Processes	GO:0032535	regulation of cellular component size	-2.62945	-0.945076	8/359	5581,7114,9168,9873,10000,10094,10451,23075	PRKCE,TMSB4X,TMSB10,FCHSD2,AKT3,ARPC3,VAV3,SWAP70
17_Member	GO Biological Processes	GO:1902903	regulation of supramolecular fiber organization	-2.47227	-0.825768	8/381	71,5581,7114,9168,9788,9873,10094,23075	ACTG1,PRKCE,TMSB4X,TMSB10,MTSS1,FCHSD2,ARPC3,SWAP70
17_Member	GO Biological Processes	GO:0044089	positive regulation of cellular component biogenesis	-2.32498	-0.707695	9/492	2823,5581,6850,8115,8631,9788,9873,23075,26053	GPM6A,PRKCE,SYK,TCL1A,SKAP1,MTSS1,FCHSD2,SWAP70,AUTS2
17_Member	GO Biological Processes	GO:0090066	regulation of anatomical structure size	-2.30809	-0.695066	9/495	490,5581,7114,9168,9873,10000,10094,10451,23075	ATP2B1,PRKCE,TMSB4X,TMSB10,FCHSD2,AKT3,ARPC3,VAV3,SWAP70
17_Member	GO Biological Processes	GO:0031334	positive regulation of protein-containing complex assembly	-2.08826	-0.519786	5/192	5581,6850,8115,8631,9873	PRKCE,SYK,TCL1A,SKAP1,FCHSD2
17_Member	GO Biological Processes	GO:0051495	positive regulation of cytoskeleton organization	-2.06995	-0.504943	5/194	5581,9788,9873,23075,26228	PRKCE,MTSS1,FCHSD2,SWAP70,STAP1
17_Member	GO Biological Processes	GO:0032271	regulation of protein polymerization	-2.01639	-0.461406	5/200	5581,7114,9168,9873,10094	PRKCE,TMSB4X,TMSB10,FCHSD2,ARPC3
18_Summary	KEGG Pathway	hsa04064	NF-kappa B signaling pathway	-5.29353	-3.24648	7/104	330,596,4050,4067,6850,29760,84433,969,5777,490,817,5026,5144,5581,8573,399,933,972,3708,7114,7178,10010,55024,83478,4205,4208,4946,56479,84329,26228,5079,23075,26051,54625,64754	BIRC3,BCL2,LTB,LYN,SYK,BLNK,CARD11,CD69,PTPN6,ATP2B1,CAMK2D,P2RX5,PDE4D,PRKCE,CASK,RHOH,CD22,CD74,ITPR1,TMSB4X,TPT1,TANK,BANK1,ARHGAP24,MEF2A,MEF2C,OAZ1,KCNQ5,HVCN1,STAP1,PAX5,SWAP70,PPP1R16B,PARP14,SMYD3
18_Member	KEGG Pathway	hsa04064	NF-kappa B signaling pathway	-5.29353	-3.24648	7/104	330,596,4050,4067,6850,29760,84433	BIRC3,BCL2,LTB,LYN,SYK,BLNK,CARD11
18_Member	WikiPathways	WP286	IL-3 signaling pathway	-4.80265	-2.78389	5/49	596,969,4067,5777,6850	BCL2,CD69,LYN,PTPN6,SYK
18_Member	GO Biological Processes	GO:0051924	regulation of calcium ion transport	-4.32311	-2.36243	9/258	490,596,817,4067,5026,5144,5581,5777,8573	ATP2B1,BCL2,CAMK2D,LYN,P2RX5,PDE4D,PRKCE,PTPN6,CASK
18_Member	GO Biological Processes	GO:1902532	negative regulation of intracellular signal transduction	-4.21666	-2.26826	13/549	399,596,933,972,3708,4067,5144,5777,7114,7178,10010,55024,83478	RHOH,BCL2,CD22,CD74,ITPR1,LYN,PDE4D,PTPN6,TMSB4X,TPT1,TANK,BANK1,ARHGAP24
18_Member	GO Biological Processes	GO:0034762	regulation of transmembrane transport	-3.81897	-1.90865	13/602	596,817,4067,4205,4208,4946,5026,5144,5581,5777,7114,56479,84329	BCL2,CAMK2D,LYN,MEF2A,MEF2C,OAZ1,P2RX5,PDE4D,PRKCE,PTPN6,TMSB4X,KCNQ5,HVCN1
18_Member	GO Biological Processes	GO:1903169	regulation of calcium ion transmembrane transport	-3.81036	-1.90412	7/177	596,817,4067,5026,5144,5581,5777	BCL2,CAMK2D,LYN,P2RX5,PDE4D,PRKCE,PTPN6
18_Member	GO Biological Processes	GO:0051282	regulation of sequestering of calcium ion	-3.79065	-1.88818	6/125	817,3708,4067,5144,5581,5777	CAMK2D,ITPR1,LYN,PDE4D,PRKCE,PTPN6
18_Member	GO Biological Processes	GO:0051279	regulation of release of sequestered calcium ion into cytosol	-3.77192	-1.87348	5/80	817,4067,5144,5581,5777	CAMK2D,LYN,PDE4D,PRKCE,PTPN6
18_Member	GO Biological Processes	GO:0043269	regulation of ion transport	-3.75267	-1.85638	14/696	490,596,817,4067,4208,5026,5144,5581,5777,6850,7114,8573,56479,84329	ATP2B1,BCL2,CAMK2D,LYN,MEF2C,P2RX5,PDE4D,PRKCE,PTPN6,SYK,TMSB4X,CASK,KCNQ5,HVCN1
18_Member	Canonical Pathways	M231	PID KIT PATHWAY	-3.45435	-1.61682	4/52	596,4067,5777,26228	BCL2,LYN,PTPN6,STAP1
18_Member	GO Biological Processes	GO:0034765	regulation of ion transmembrane transport	-3.34949	-1.52905	11/504	596,817,4067,4208,5026,5144,5581,5777,7114,56479,84329	BCL2,CAMK2D,LYN,MEF2C,P2RX5,PDE4D,PRKCE,PTPN6,TMSB4X,KCNQ5,HVCN1
18_Member	GO Biological Processes	GO:1904062	regulation of cation transmembrane transport	-3.07162	-1.30219	9/381	596,817,4067,4208,5026,5144,5581,5777,7114	BCL2,CAMK2D,LYN,MEF2C,P2RX5,PDE4D,PRKCE,PTPN6,TMSB4X
18_Member	Canonical Pathways	M233	PID EPO PATHWAY	-2.90805	-1.16528	3/33	596,4067,5777	BCL2,LYN,PTPN6
18_Member	GO Biological Processes	GO:0010959	regulation of metal ion transport	-2.84333	-1.11226	9/411	490,596,817,4067,5026,5144,5581,5777,8573	ATP2B1,BCL2,CAMK2D,LYN,P2RX5,PDE4D,PRKCE,PTPN6,CASK
18_Member	WikiPathways	WP127	IL-5 signaling pathway	-2.66448	-0.973466	3/40	596,4067,6850	BCL2,LYN,SYK
18_Member	GO Biological Processes	GO:0031400	negative regulation of protein modification process	-2.17276	-0.586615	9/520	4067,5079,5144,5581,5777,23075,26051,54625,64754	LYN,PAX5,PDE4D,PRKCE,PTPN6,SWAP70,PPP1R16B,PARP14,SMYD3
18_Member	WikiPathways	WP304	Kit receptor signaling pathway	-2.16569	-0.581791	3/60	596,4067,5777	BCL2,LYN,PTPN6
18_Member	GO Biological Processes	GO:0045936	negative regulation of phosphate metabolic process	-2.10529	-0.532462	8/440	4067,5144,5777,23075,26051,26228,54625,64754	LYN,PDE4D,PTPN6,SWAP70,PPP1R16B,STAP1,PARP14,SMYD3
18_Member	GO Biological Processes	GO:0010563	negative regulation of phosphorus metabolic process	-2.09966	-0.527566	8/441	4067,5144,5777,23075,26051,26228,54625,64754	LYN,PDE4D,PTPN6,SWAP70,PPP1R16B,STAP1,PARP14,SMYD3
19_Summary	GO Biological Processes	GO:0042100	B cell proliferation	-5.08597	-3.04753	5/43	596,931,973,4208,84433,4643,9788,4067,9839,1130	BCL2,MS4A1,CD79A,MEF2C,CARD11,MYO1E,MTSS1,LYN,ZEB2,LYST
19_Member	GO Biological Processes	GO:0042100	B cell proliferation	-5.08597	-3.04753	5/43	596,931,973,4208,84433	BCL2,MS4A1,CD79A,MEF2C,CARD11
19_Member	GO Biological Processes	GO:0046651	lymphocyte proliferation	-3.67229	-1.78811	5/84	596,931,973,4208,84433	BCL2,MS4A1,CD79A,MEF2C,CARD11
19_Member	GO Biological Processes	GO:0032943	mononuclear cell proliferation	-3.64821	-1.76552	5/85	596,931,973,4208,84433	BCL2,MS4A1,CD79A,MEF2C,CARD11
19_Member	GO Biological Processes	GO:0070661	leukocyte proliferation	-3.38186	-1.55099	5/97	596,931,973,4208,84433	BCL2,MS4A1,CD79A,MEF2C,CARD11
19_Member	GO Biological Processes	GO:0032835	glomerulus development	-3.36057	-1.53674	4/55	596,4208,4643,9788	BCL2,MEF2C,MYO1E,MTSS1
19_Member	GO Biological Processes	GO:0001782	B cell homeostasis	-3.1665	-1.38663	3/27	596,4067,4208	BCL2,LYN,MEF2C
19_Member	GO Biological Processes	GO:0035850	epithelial cell differentiation involved in kidney development	-2.79736	-1.0787	3/36	4208,4643,9788	MEF2C,MYO1E,MTSS1
19_Member	GO Biological Processes	GO:0048066	developmental pigmentation	-2.66448	-0.973466	3/40	596,4208,9839	BCL2,MEF2C,ZEB2
19_Member	GO Biological Processes	GO:0061005	cell differentiation involved in kidney development	-2.46361	-0.821398	3/47	4208,4643,9788	MEF2C,MYO1E,MTSS1
19_Member	GO Biological Processes	GO:0072009	nephron epithelium development	-2.41278	-0.777363	4/99	596,4208,4643,9788	BCL2,MEF2C,MYO1E,MTSS1
19_Member	GO Biological Processes	GO:0043473	pigmentation	-2.36658	-0.737844	4/102	596,1130,4208,9839	BCL2,LYST,MEF2C,ZEB2
19_Member	GO Biological Processes	GO:0002260	lymphocyte homeostasis	-2.24905	-0.652256	3/56	596,4067,4208	BCL2,LYN,MEF2C
19_Member	GO Biological Processes	GO:0061333	renal tubule morphogenesis	-2.03378	-0.474583	3/67	596,4208,9788	BCL2,MEF2C,MTSS1
19_Member	GO Biological Processes	GO:0072006	nephron development	-2.02258	-0.465502	4/128	596,4208,4643,9788	BCL2,MEF2C,MYO1E,MTSS1
19_Member	GO Biological Processes	GO:0072073	kidney epithelium development	-2.02258	-0.465502	4/128	596,4208,4643,9788	BCL2,MEF2C,MYO1E,MTSS1
20_Summary	GO Biological Processes	GO:0007169	transmembrane receptor protein tyrosine kinase signaling pathway	-4.86961	-2.84788	12/405	640,4067,4643,5747,6850,9068,9451,9788,26037,26228,29760,84159,2530,7204	BLK,LYN,MYO1E,PTK2,SYK,ANGPTL1,EIF2AK3,MTSS1,SIPA1L1,STAP1,BLNK,ARID5B,FUT8,TRIO
20_Member	GO Biological Processes	GO:0007169	transmembrane receptor protein tyrosine kinase signaling pathway	-4.86961	-2.84788	12/405	640,4067,4643,5747,6850,9068,9451,9788,26037,26228,29760,84159	BLK,LYN,MYO1E,PTK2,SYK,ANGPTL1,EIF2AK3,MTSS1,SIPA1L1,STAP1,BLNK,ARID5B
20_Member	GO Biological Processes	GO:0007167	enzyme-linked receptor protein signaling pathway	-4.38511	-2.41544	14/606	640,2530,4067,4643,5747,6850,7204,9068,9451,9788,26037,26228,29760,84159	BLK,FUT8,LYN,MYO1E,PTK2,SYK,TRIO,ANGPTL1,EIF2AK3,MTSS1,SIPA1L1,STAP1,BLNK,ARID5B
